# Supplementary material for: Kinetic studies on strand displacement in de novo designed parallel heterodimeric coiled coils
Source: PubMed Central journal article supplement (PMC5944379; doi:10.1039/c7sc05342h), 2018-04-17
Supplement: SC-009-C7SC05342H-s001.pdf [file SC-009-C7SC05342H-s001.pdf]

## **Supporting Information**

### ***Kinetic studies on strand displacement in de novo designed parallel heterodimeric coiled coils***

Mike C. Groth,<sup>a</sup> W. Mathis Rink,<sup>a</sup> Nils F. Meyer,<sup>a</sup> and Franziska Thomas<sup>\*a, b</sup>

<sup>a</sup>Institute of Organic and Biomolecular Chemistry, Georg-August-Universität Göttingen, Tammannstr. 2, 37077 Göttingen, Germany

<sup>b</sup>Center for Biostructural Imaging of Neurodegeneration, von-Siebold-Straße 3a, 37075 Göttingen, Germany

\*To correspondence should be addressed: [ftomas@gwdg.de](mailto:ftomas@gwdg.de)

### **Table of Content**

|                                                                                             |     |
|---------------------------------------------------------------------------------------------|-----|
| 1. Peptide sequences.....                                                                   | S2  |
| 2. Determination of unfolding constants .....                                               | S4  |
| 3. CD-titration experiments.....                                                            | S10 |
| 4. FRET-based strand-displacement assay .....                                               | S22 |
| 5. MALDI-TOF mass spectrometry and HPLC .....                                               | S52 |
| 6. CD spectroscopy and thermal denaturation of C-truncated heterodimeric coiled coils ..... | S59 |
| 7. References.....                                                                          | S64 |

## 1. Peptide sequences

**Table S1.** Sequences of the *N*-terminally truncated set of *de novo* designed heterodimeric coiled coils. K<sup>+</sup>-Dansyl-labelled lysine residue.

|           | <b>N-A<sub>x</sub>B<sub>y</sub></b>                | <b>Sequence and heptad register<sup>b</sup></b> |                              |         |            |
|-----------|----------------------------------------------------|-------------------------------------------------|------------------------------|---------|------------|
|           |                                                    | <i>gabcdef gabcdef gabcdef gabcdef</i>          |                              |         |            |
| <b>1</b>  | N-A <sub>3</sub>                                   | G                                               | EIAALEK                      | ENAALEW | EIAALEQ GG |
| <b>2</b>  | N-A <sub>3.5</sub>                                 | G                                               | LEQ EIAALEK                  | ENAALEW | EIAALEQ GG |
| <b>3</b>  | A <sub>4</sub>                                     | G                                               | EIAALEQ EIAALEK              | ENAALEW | EIAALEQ GG |
| <b>4</b>  | N-B <sub>3</sub>                                   | G                                               | KIAALKY                      | KNAALKK | KIAALKQ GG |
| <b>5</b>  | N-B <sub>3.5</sub>                                 | G                                               | LKQ KIAALKY                  | KNAALKK | KIAALKQ GG |
| <b>6</b>  | B <sub>4</sub>                                     | G                                               | KIAALKQ KIAALKY              | KNAALKK | KIAALKQ GG |
| <b>7</b>  | N-A <sub>3</sub> <sup>*</sup>                      | G                                               | EIAALEW                      | ENAALEK | EIAALEQ GG |
| <b>8</b>  | N-A <sub>3.5</sub> <sup>*</sup>                    | G                                               | LEQ EIAALEW                  | ENAALEK | EIAALEQ GG |
| <b>9</b>  | A <sub>4</sub> <sup>*</sup>                        | G                                               | EIAALEQ EIAALEW              | ENAALEK | EIAALEQ GG |
| <b>10</b> | N-B <sub>3</sub> <sup>*</sup>                      | G                                               | KIAALKK <sup>*</sup>         | KNAALKK | KIAALKQ GG |
| <b>11</b> | N-B <sub>3.5</sub> <sup>*</sup>                    | G                                               | LKQ KIAALKK <sup>*</sup>     | KNAALKK | KIAALKQ GG |
| <b>12</b> | B <sub>4</sub> <sup>*</sup>                        | G                                               | KIAALKQ KIAALKK <sup>*</sup> | KNAALKK | KIAALKQ GG |
| <b>13</b> | N-A <sub>3</sub> _W15K (N-A <sub>3</sub> comp)     | G                                               | EIAALEK                      | ENAALEK | EIAALEQ GG |
| <b>14</b> | N-A <sub>3.5</sub> _W18K (N-A <sub>3.5</sub> comp) | G                                               | LEQ EIAALEK                  | ENAALEK | EIAALEQ GG |
| <b>15</b> | A <sub>4</sub> _W22K (A <sub>4</sub> comp)         | G                                               | EIAALEQ EIAALEK              | ENAALEK | EIAALEQ GG |

**Table S2.** Sequences of the C-terminally truncated set of *de novo* designed heterodimeric coiled coils. K<sup>\*</sup>-Dansyl-labelled lysine residue.

|           | <b>C-A<sub>x</sub>B<sub>y</sub></b>                | <b>Sequence and heptad register<sup>b</sup></b> |                      |                 |                |
|-----------|----------------------------------------------------|-------------------------------------------------|----------------------|-----------------|----------------|
|           |                                                    | <i>gabcdef</i>                                  | <i>gabcdef</i>       | <i>gabcdef</i>  | <i>gabcdef</i> |
| <b>1</b>  | C-A <sub>3</sub>                                   | G EIAALEQ                                       | EIAALEK              | ENAALEW         | GG             |
| <b>2</b>  | C-A <sub>3.5</sub>                                 | G EIAALEQ                                       | EIAALEK              | ENAALEW EIAA    | GG             |
| <b>3</b>  | A <sub>4</sub>                                     | G EIAALEQ                                       | EIAALEK              | ENAALEW EIAALEQ | GG             |
| <b>4</b>  | C-B <sub>3</sub>                                   | G KIAALKQ                                       | KIAALKY              | KNAALKK         | GG             |
| <b>5</b>  | C-B <sub>3.5</sub>                                 | G KIAALKQ                                       | KIAALKY              | KNAALKK KIAA    | GG             |
| <b>6</b>  | B <sub>4</sub>                                     | G KIAALKQ                                       | KIAALKY              | KNAALKK KIAALKQ | GG             |
| <b>7</b>  | C-A <sub>3</sub> <sup>*</sup>                      | G EIAALEQ                                       | EIAALEW              | ENAALEK         | GG             |
| <b>8</b>  | C-A <sub>3.5</sub> <sup>*</sup>                    | G EIAALEQ                                       | EIAALEW              | ENAALEK EIAA    | GG             |
| <b>9</b>  | A <sub>4</sub> <sup>*</sup>                        | G EIAALEQ                                       | EIAALEW              | ENAALEK EIAALEQ | GG             |
| <b>10</b> | C-B <sub>3</sub> <sup>*</sup>                      | G KIAALKQ                                       | KIAALKK <sup>*</sup> | KNAALKK         | GG             |
| <b>11</b> | C-B <sub>3.5</sub> <sup>*</sup>                    | G KIAALKQ                                       | KIAALKK <sup>*</sup> | KNAALKK KIAA    | GG             |
| <b>12</b> | B <sub>4</sub> <sup>*</sup>                        | G KIAALKQ                                       | KIAALKK <sup>*</sup> | KNAALKK KIAALKQ | GG             |
| <b>13</b> | C-A <sub>3</sub> _W22K (C-A <sub>3</sub> comp)     | G EIAALEQ                                       | EIAALEK              | ENAALEK         | GG             |
| <b>14</b> | C-A <sub>3.5</sub> _W22K (C-A <sub>3.5</sub> comp) | G EIAALEQ                                       | EIAALEK              | ENAALEK EIAA    | GG             |
| <b>15</b> | A <sub>4</sub> _W22K (A <sub>4</sub> comp)         | G EIAALEQ                                       | EIAALEK              | ENAALEK EIAALEQ | GG             |

A<sub>4</sub> and B<sub>4</sub> are the same in both sets of heterodimeric coiled coils.

## 2. Determination of unfolding constants

**Table S3.** Equilibrium constants of dissociation  $K_D$  of the N- $A_xB_y$  peptides obtained from the thermal denaturation curves at 50  $\mu$ M coiled-coil concentration (N- $A_3B_3$  – N- $A_4B_{3.5}$ ) and 25  $\mu$ M ( $A_4B_4$ ) using FitDis! analysis software.<sup>1</sup>

| $K_D$ (M)    | N- $A_3$                      | N- $A_{3.5}$                  | $A_4$                          |
|--------------|-------------------------------|-------------------------------|--------------------------------|
| N- $B_3$     | $(4.5 \pm 2.2) \cdot 10^{-6}$ | $(8.0 \pm 7.2) \cdot 10^{-7}$ | $(2.5 \pm 1.9) \cdot 10^{-7}$  |
| N- $B_{3.5}$ | $(1.9 \pm 1.1) \cdot 10^{-6}$ | $(6.4 \pm 3.7) \cdot 10^{-9}$ | $(9.2 \pm 5.9) \cdot 10^{-10}$ |
| $B_4$        | $(8.8 \pm 3.5) \cdot 10^{-7}$ | $(1.0 \pm 1.1) \cdot 10^{-9}$ | $(5.7 \pm 1.1) \cdot 10^{-10}$ |

**Table S4.** Equilibrium constants of dissociation  $K_D$  of the C- $A_xB_y$  peptides obtained from the thermal denaturation curves at 50  $\mu$ M coiled-coil concentration (C- $A_3B_3$  – C- $A_4B_{3.5}$ ) and 25  $\mu$ M ( $A_4B_4$ ) using FitDis! analysis software.<sup>1</sup>

| $K_D$ (M)    | C- $A_3$                      | C- $A_{3.5}$                  | $A_4$                           |
|--------------|-------------------------------|-------------------------------|---------------------------------|
| C- $B_3$     | $(4.9 \pm 3.5) \cdot 10^{-6}$ | $(2.8 \pm 0.5) \cdot 10^{-6}$ | $(3.1 \pm 1.5) \cdot 10^{-6}$   |
| C- $B_{3.5}$ | $(1.5 \pm 3.0) \cdot 10^{-6}$ | $(8.9 \pm 5.8) \cdot 10^{-8}$ | $(5.5 \pm 2.4) \cdot 10^{-8}$   |
| $B_4$        | $(8.6 \pm 2.1) \cdot 10^{-7}$ | $(7.3 \pm 1.1) \cdot 10^{-9}$ | $(5.7 \pm 1.06) \cdot 10^{-10}$ |

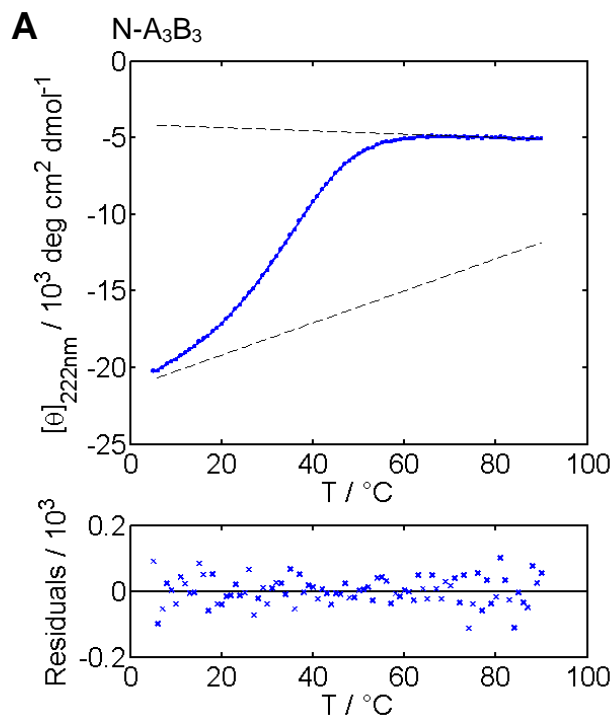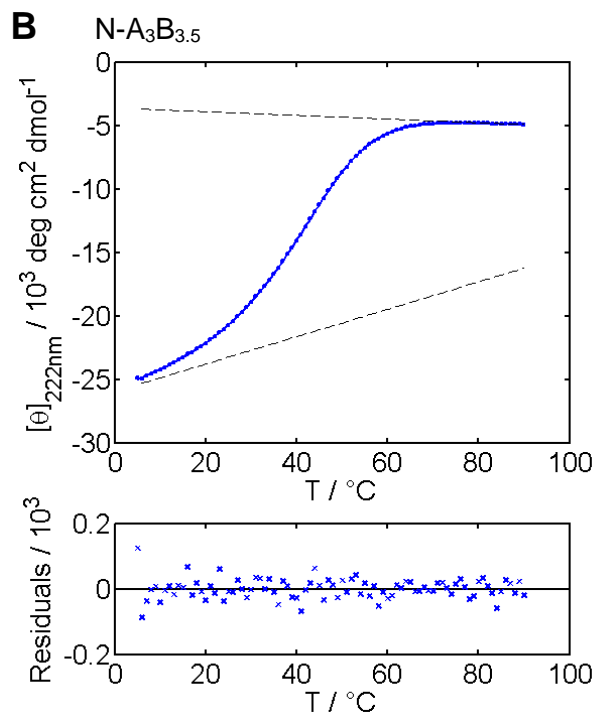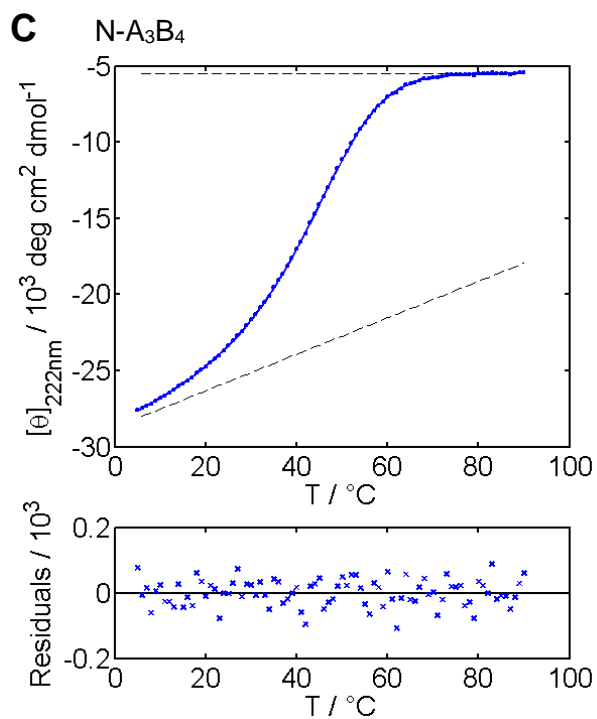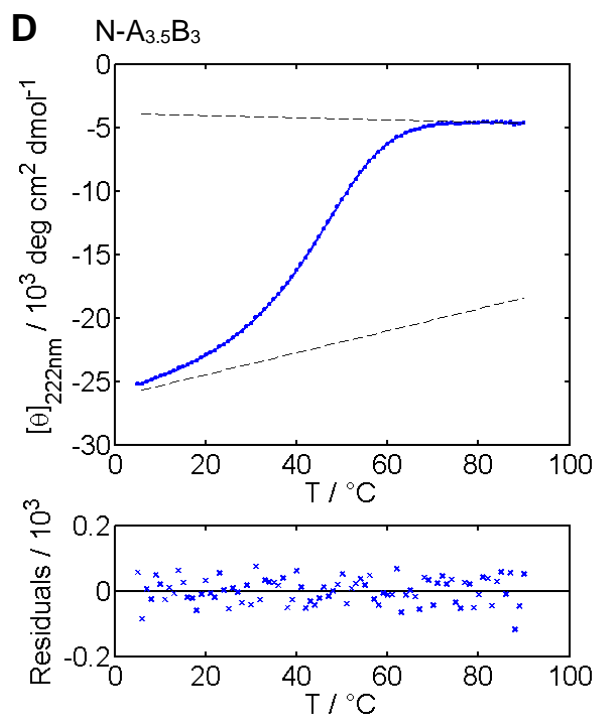

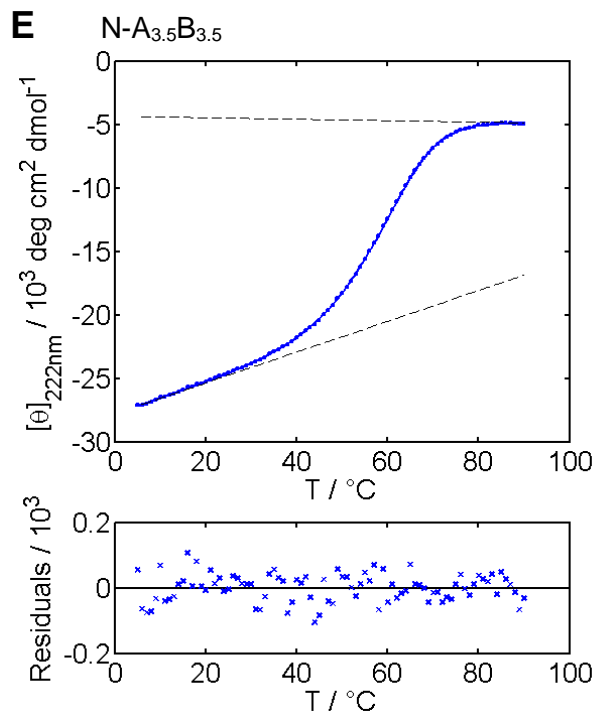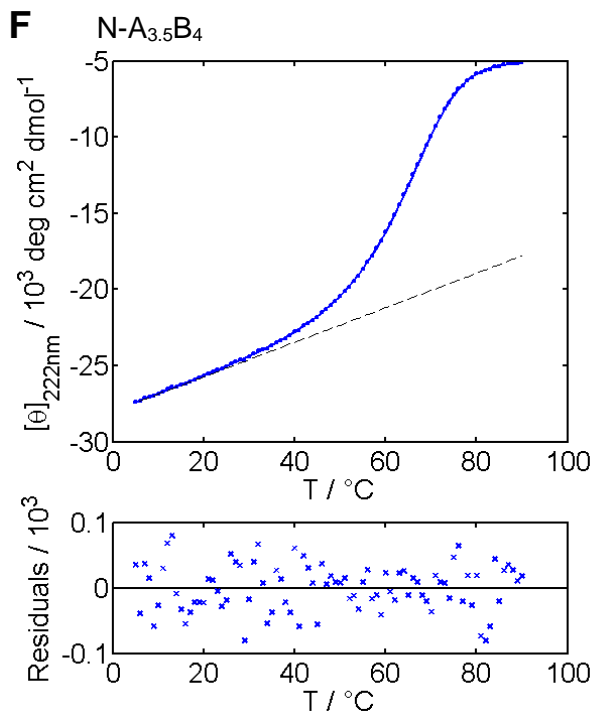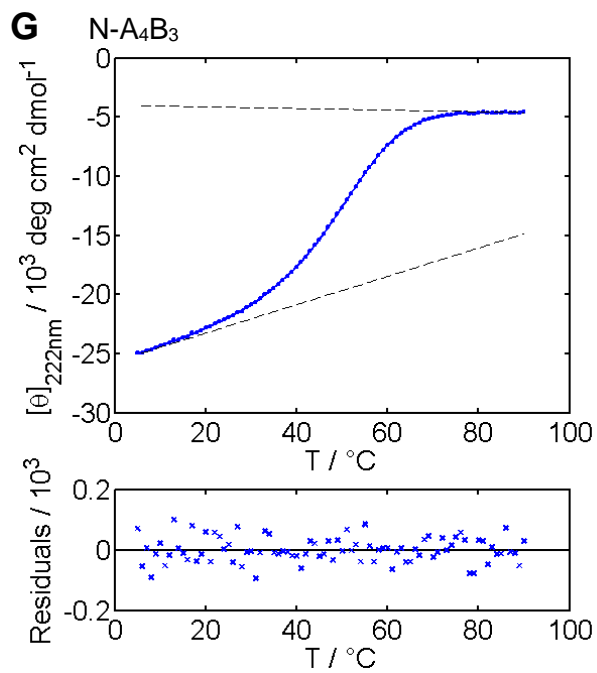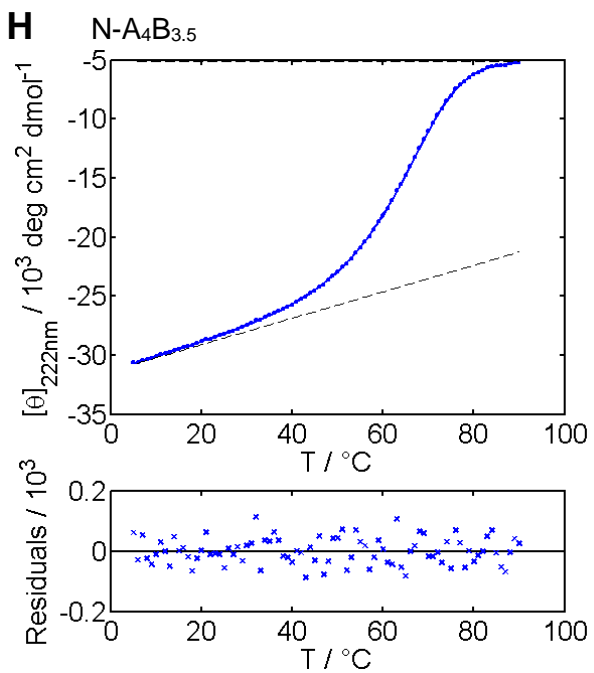

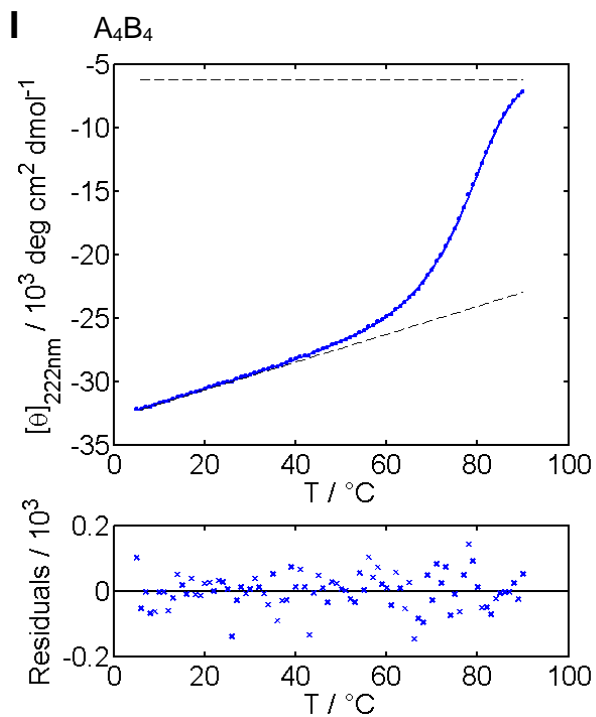

**Figure S1.** CD-thermal denaturation curves of the  $N-A_xB_y$  peptides fit to a two-state unfolding model (top) and residuals depicting the quality of the fit (bottom). A)  $N-A_3B_3$ , B)  $N-A_3B_{3.5}$ , C)  $N-A_3B_4$ , D)  $N-A_{3.5}B_3$ , E)  $N-A_{3.5}B_{3.5}$ , F)  $N-A_{3.5}B_4$ , G)  $N-A_4B_3$ , H)  $N-A_4B_{3.5}$ , I)  $A_4B_4$ . Thermal denaturation curves were recorded at  $50 \mu\text{M}$  coiled-coil concentration ( $A_4B_4$ :  $25 \mu\text{M}$  coiled-coil concentration) in PBS buffer. Data were processed using the FitDis! analysis software.<sup>1</sup>

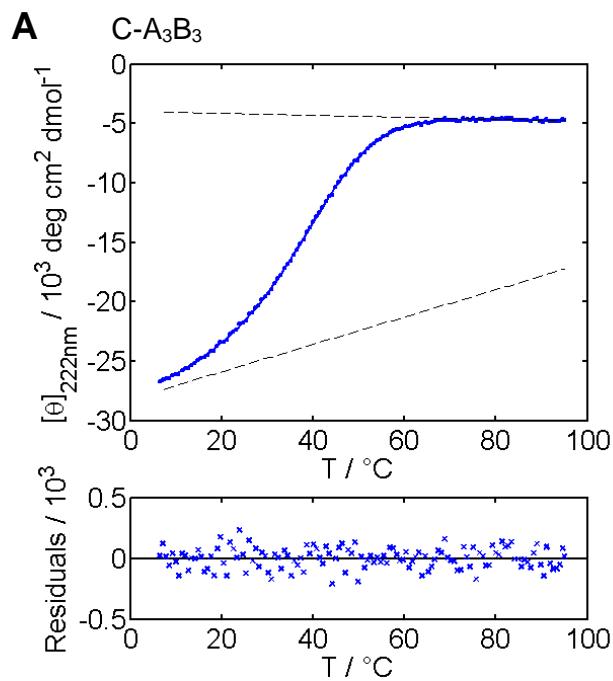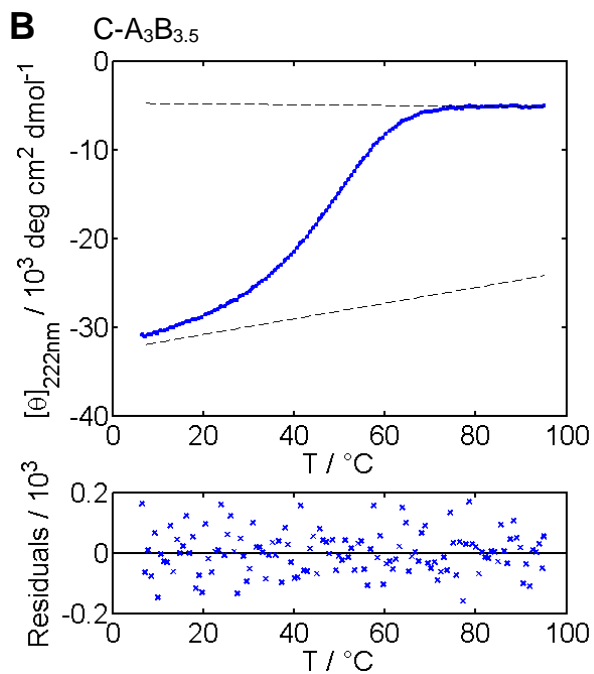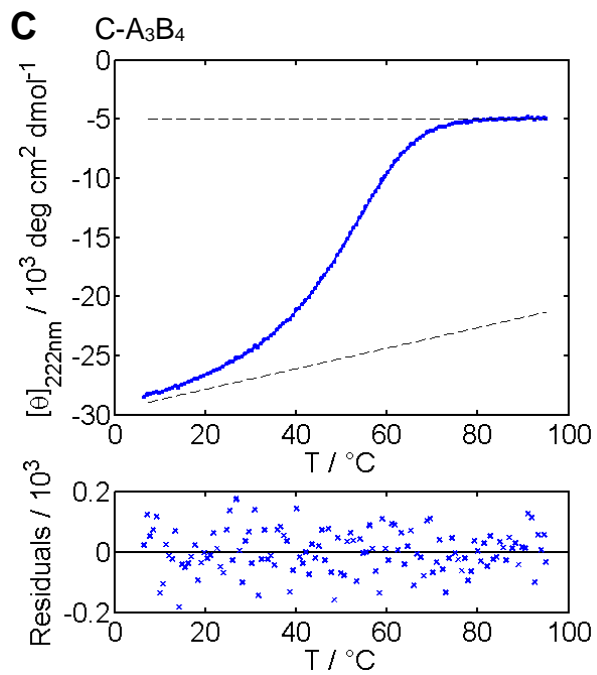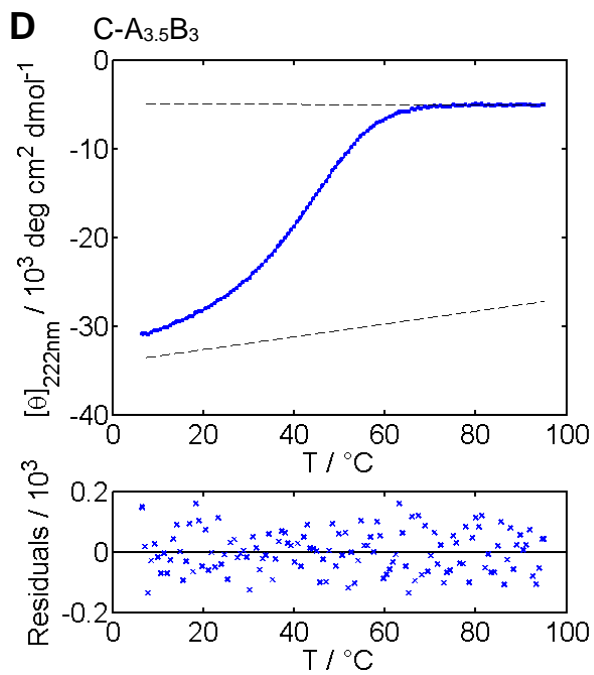



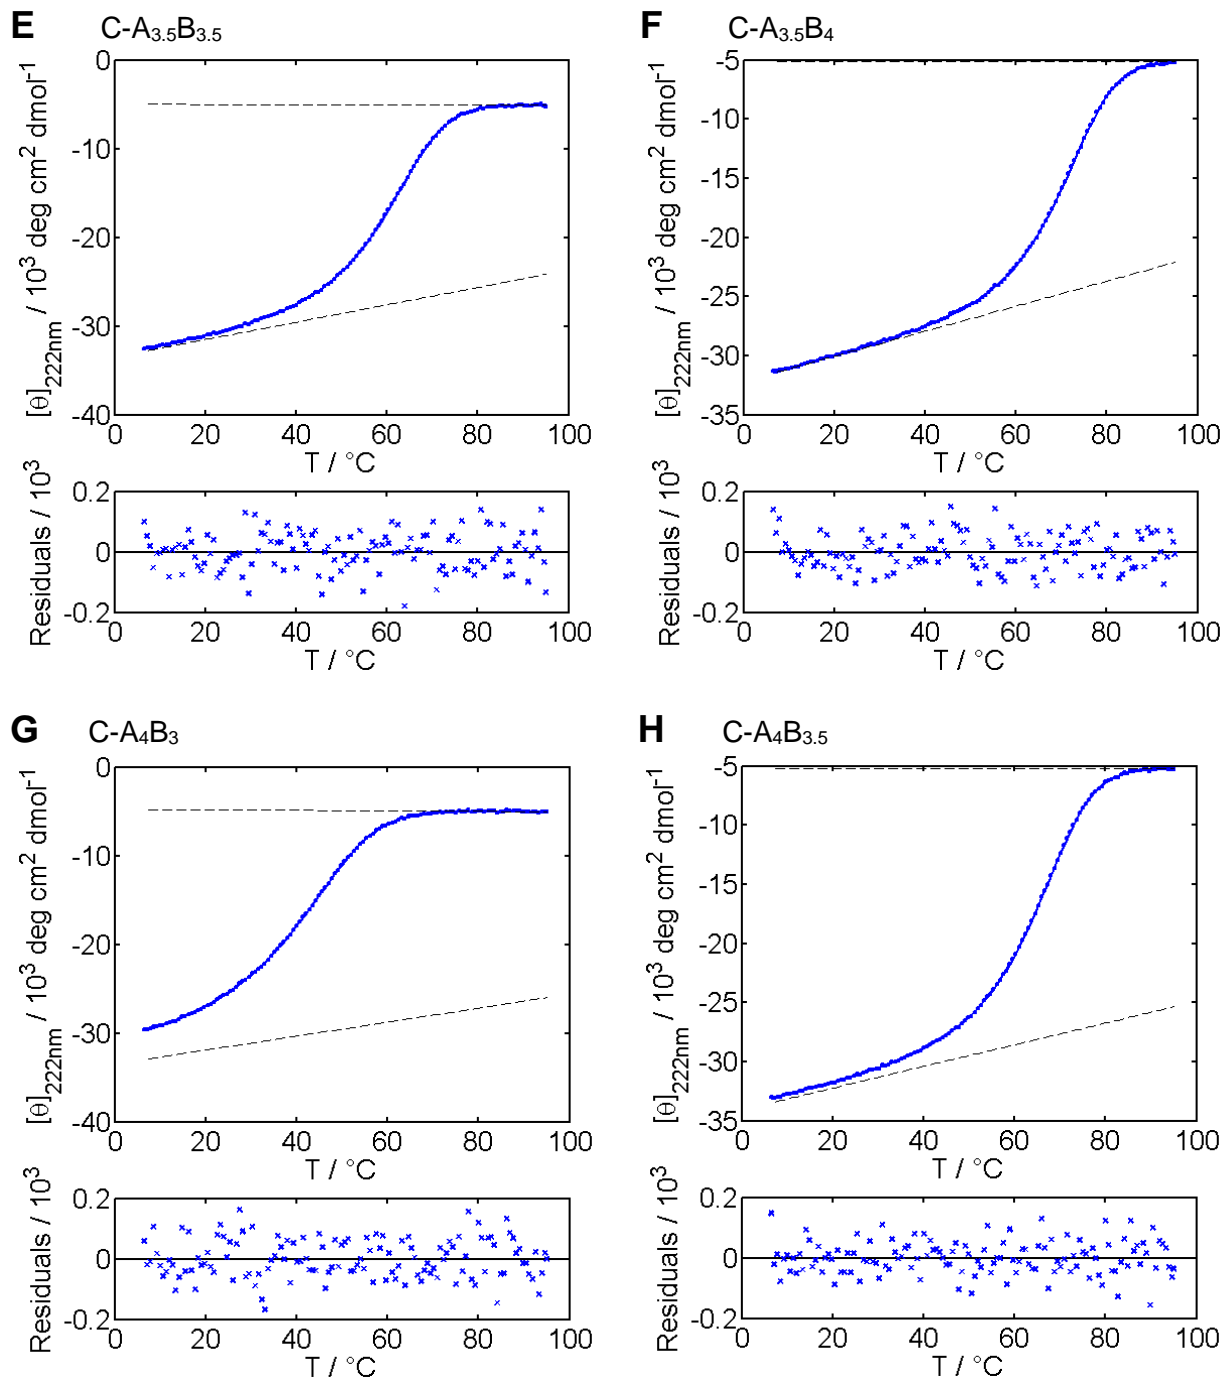

**Figure S2.** CD-thermal denaturation curves of the C-A<sub>x</sub>B<sub>y</sub> peptides fit to a two-state unfolding model (top) and residuals depicting the quality of the fit (bottom). A) C-A<sub>3</sub>B<sub>3</sub>, B) C-A<sub>3</sub>B<sub>3.5</sub>, C) C-A<sub>3</sub>B<sub>4</sub>, D) C-A<sub>3.5</sub>B<sub>3</sub>, E) C-A<sub>3.5</sub>B<sub>3.5</sub>, F) C-A<sub>3.5</sub>B<sub>4</sub>, G) C-A<sub>4</sub>B<sub>3</sub>, H) C-A<sub>4</sub>B<sub>3.5</sub>. Thermal denaturation curves were recorded at 50 μM coiled-coil concentration (A<sub>4</sub>B<sub>4</sub>: 25 μM coiled-coil concentration) in PBS buffer. Data were processed using the FitDis! analysis software.<sup>1</sup>

### 3. CD-titration experiments

**A** N-A<sub>3</sub>B<sub>3</sub>  $\uparrow\downarrow$  A<sub>3.5</sub>

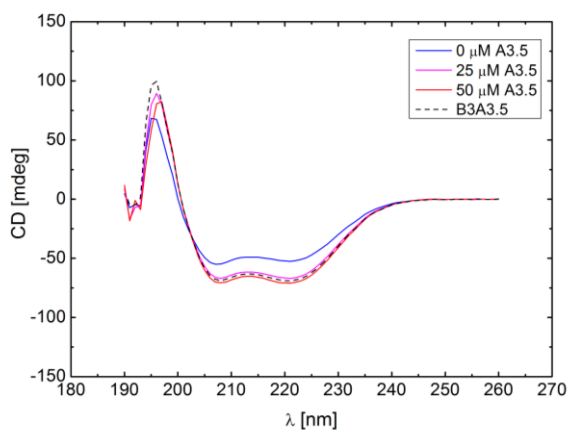

**B** N-A<sub>3.5</sub>B<sub>3</sub>  $\uparrow\downarrow$  A<sub>3</sub>

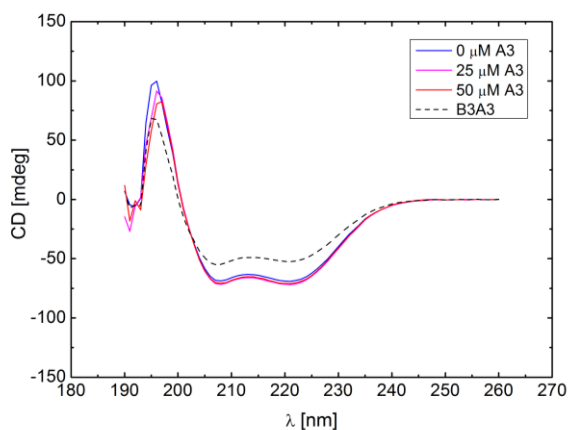

**C** N-A<sub>3</sub>B<sub>3</sub>  $\uparrow\downarrow$  A<sub>4</sub>

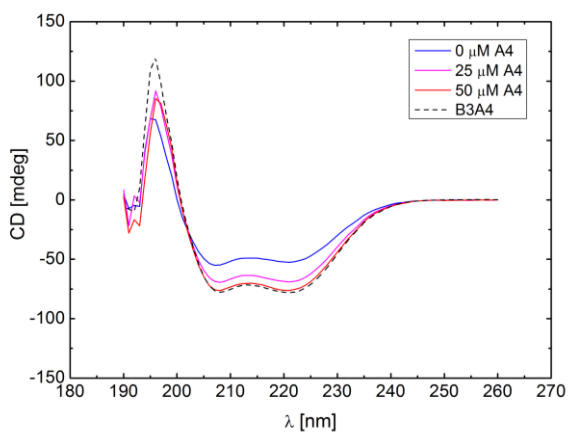

**D** N-A<sub>4</sub>B<sub>3</sub>  $\uparrow\downarrow$  A<sub>3</sub>

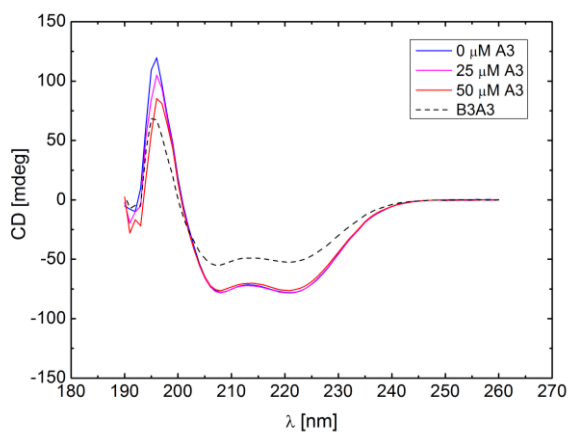

**E** N-A<sub>3</sub>B<sub>3</sub>  $\uparrow\downarrow$  B<sub>3.5</sub>

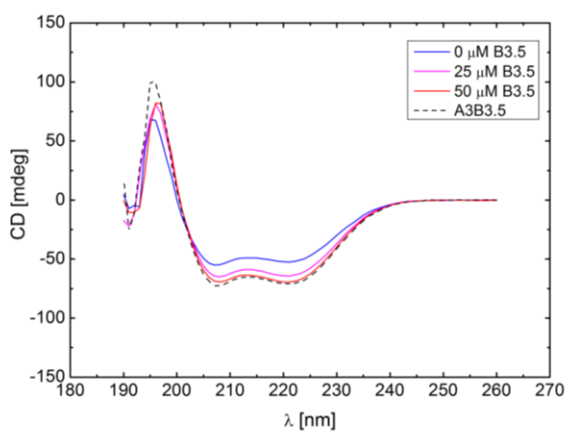

**F** N-A<sub>3</sub>B<sub>3.5</sub>  $\uparrow\downarrow$  B<sub>3</sub>

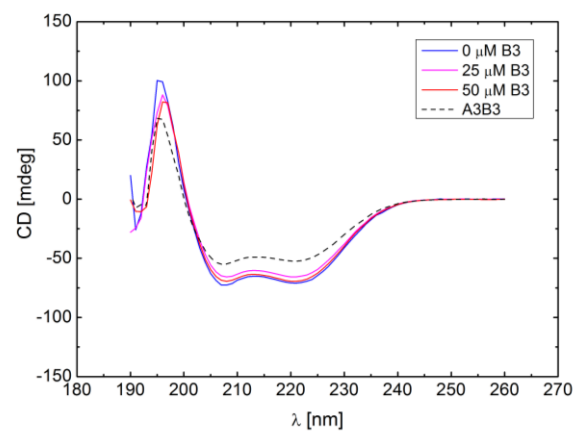

**G** N-A<sub>3</sub>B<sub>3</sub> ⇌ B<sub>4</sub>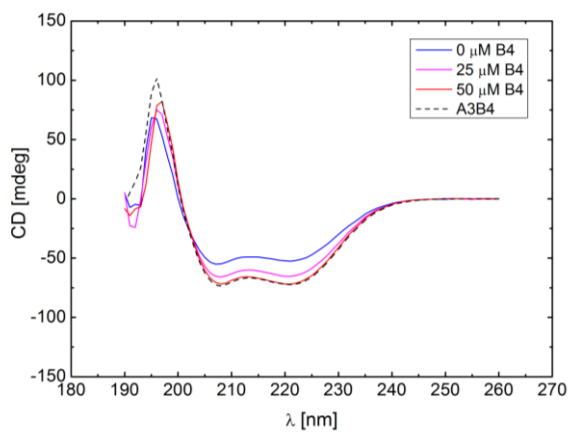**H** N-A<sub>3</sub>B<sub>4</sub> ⇌ B<sub>3</sub>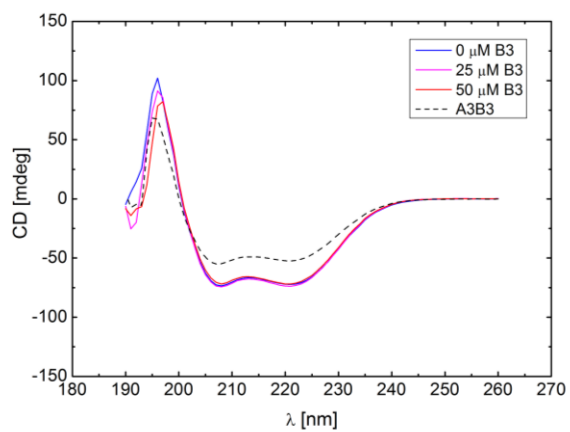**I** N-A<sub>3</sub>B<sub>3.5</sub> ⇌ A<sub>3.5</sub>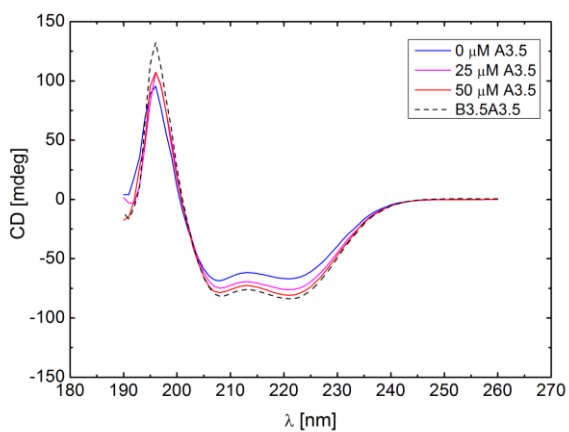**J** N-A<sub>3.5</sub> B<sub>3.5</sub> ⇌ A<sub>3</sub>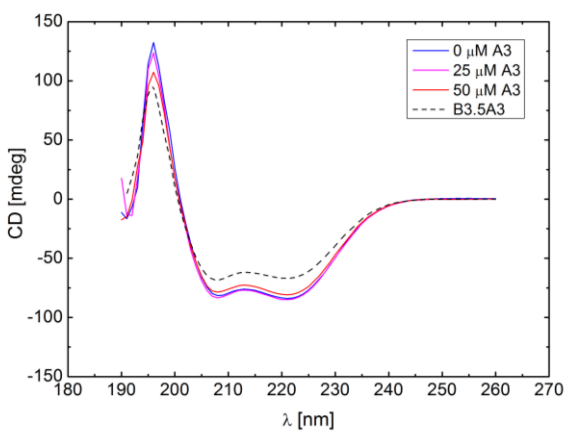**K** N-A<sub>3</sub>B<sub>3.5</sub> ⇌ A<sub>4</sub>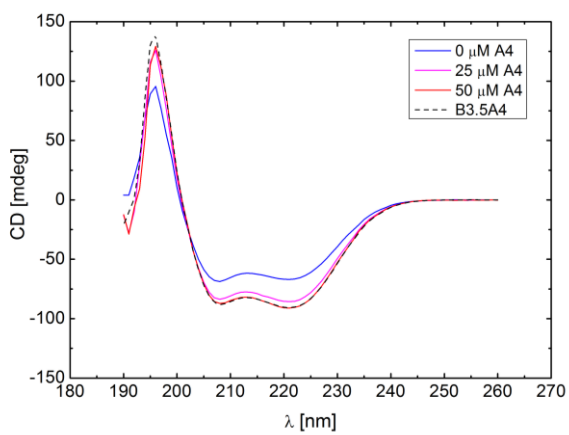**L** N-A<sub>4</sub>B<sub>3.5</sub> ⇌ A<sub>3</sub>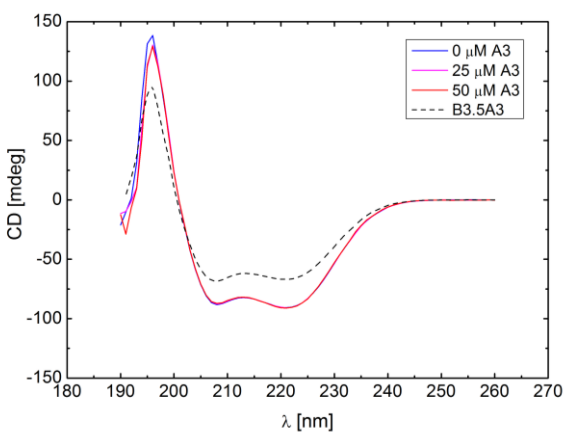

**M** N-A<sub>3</sub>B<sub>3.5</sub>  $\uparrow\downarrow$  B<sub>4</sub>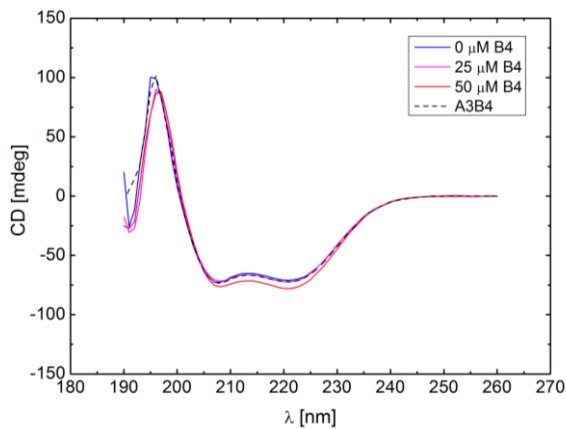**N** N-A<sub>3</sub>B<sub>4</sub>  $\uparrow\downarrow$  B<sub>3.5</sub>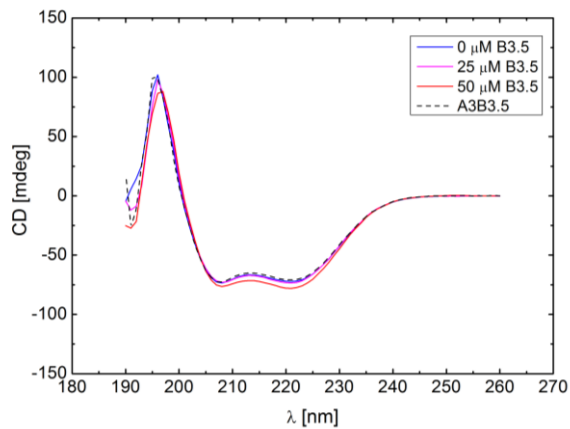**O** N-A<sub>3</sub>B<sub>4</sub>  $\uparrow\downarrow$  A<sub>3.5</sub>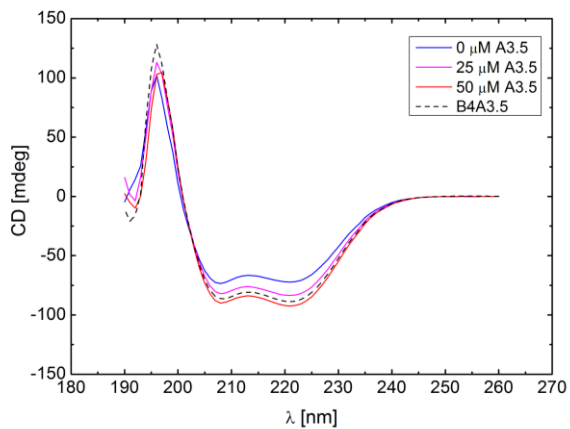**P** N-A<sub>3.5</sub>B<sub>4</sub>  $\uparrow\downarrow$  A<sub>3</sub>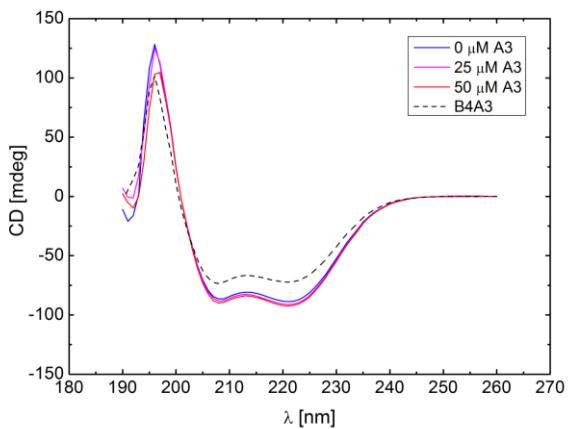**Q** N-A<sub>3</sub>B<sub>4</sub>  $\uparrow\downarrow$  A<sub>4</sub>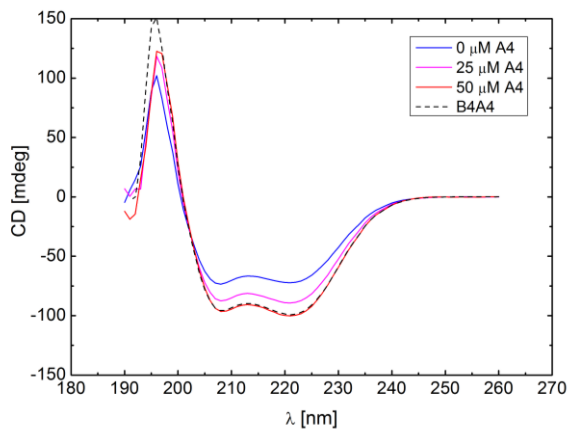**R** N-A<sub>4</sub>B<sub>4</sub>  $\uparrow\downarrow$  A<sub>3</sub>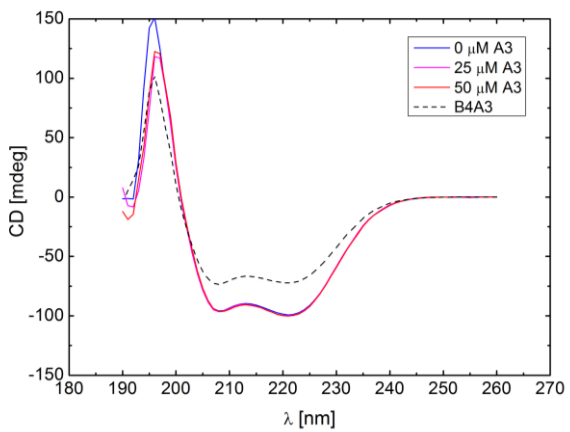

**S** N-A<sub>3.5</sub>B<sub>3</sub> ↑↓ A<sub>4</sub>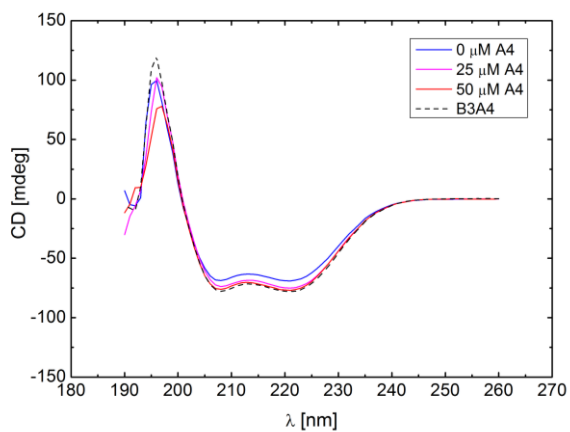**T** N-A<sub>4</sub>B<sub>3</sub> ↑↓ A<sub>3.5</sub>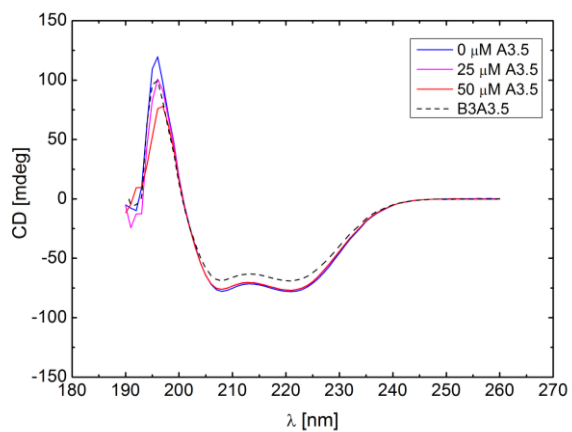**U** N-A<sub>3.5</sub>B<sub>3</sub> ↑↓ B<sub>3.5</sub>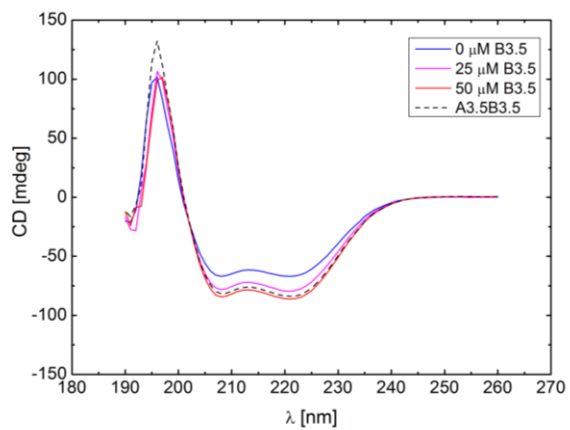**V** N-A<sub>3.5</sub>B<sub>3.5</sub> ↑↓ B<sub>3</sub>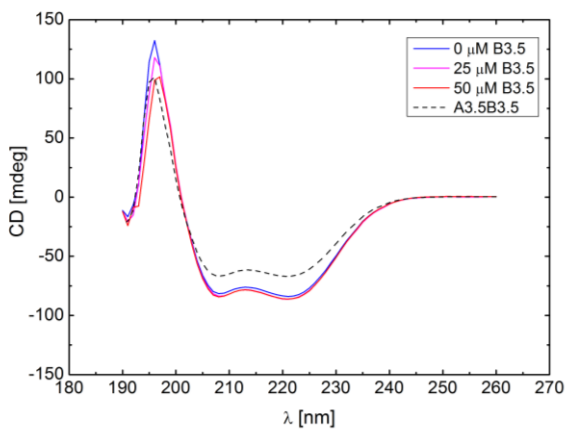**W** N-A<sub>3.5</sub>B<sub>3</sub> ↑↓ B<sub>4</sub>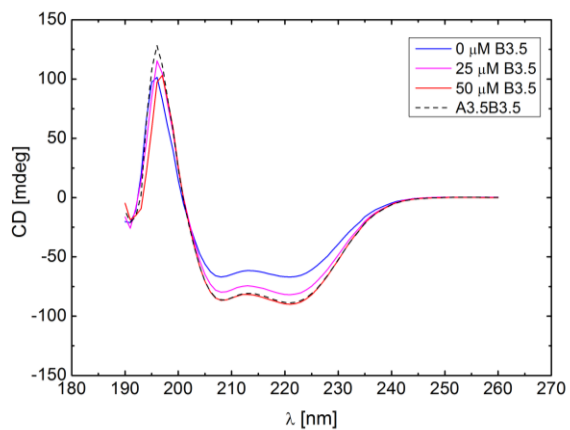**X** N-A<sub>3.5</sub>B<sub>4</sub> ↑↓ B<sub>3</sub>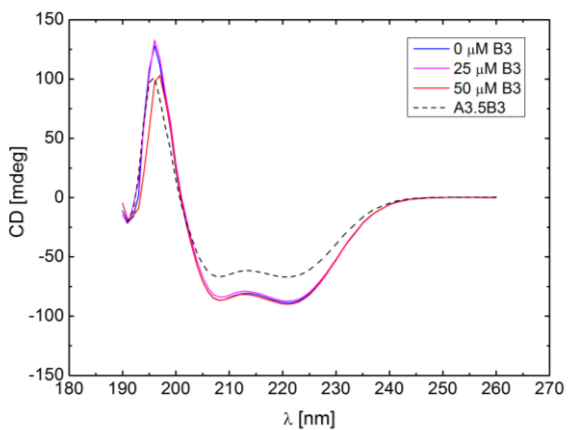

**Y** N-A<sub>3.5</sub>B<sub>3.5</sub>  $\uparrow\downarrow$  A<sub>4</sub>

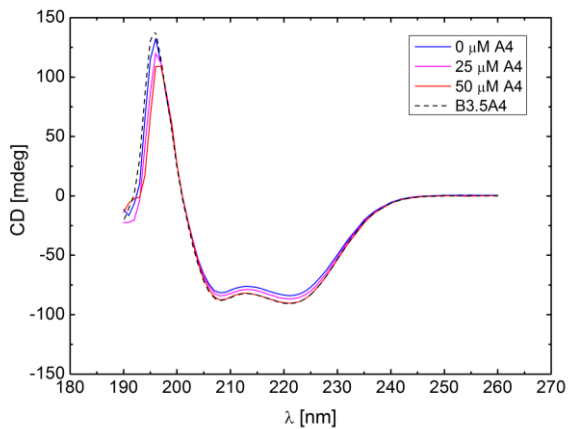

**Z** N-A<sub>4</sub>B<sub>3.5</sub>  $\uparrow\downarrow$  A<sub>3.5</sub>

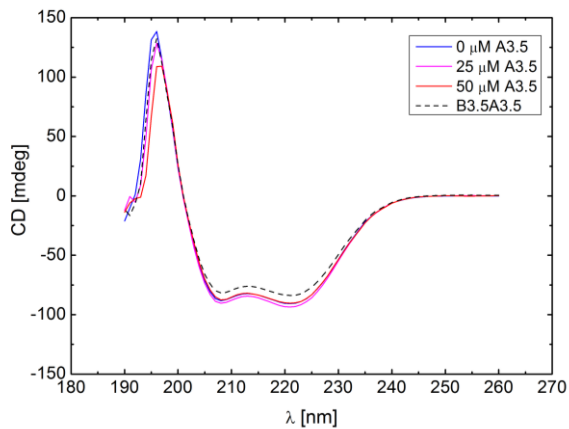

**Aa** N-A<sub>3.5</sub>B<sub>3.5</sub>  $\uparrow\downarrow$  B<sub>4</sub>

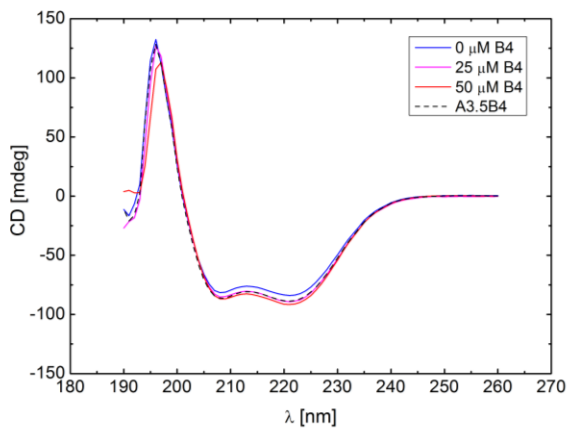

**Bb** N-A<sub>3.5</sub>B<sub>4</sub>  $\uparrow\downarrow$  B<sub>3.5</sub>

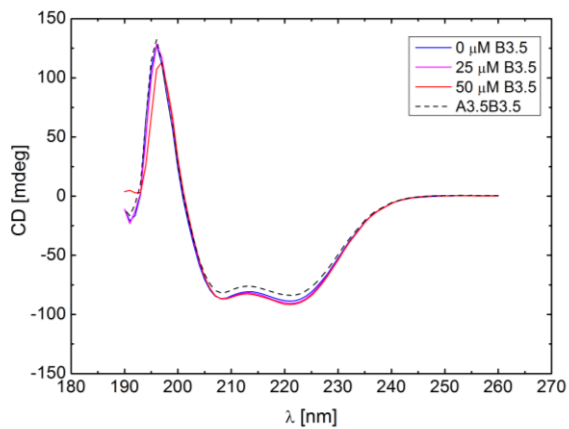

**Cc** N-A<sub>3.5</sub>B<sub>4</sub>  $\uparrow\downarrow$  A<sub>4</sub>

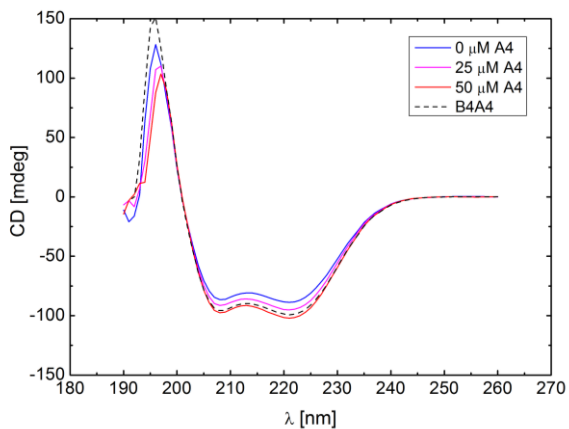

**Dd** N-A<sub>4</sub>B<sub>4</sub>  $\uparrow\downarrow$  A<sub>3.5</sub>

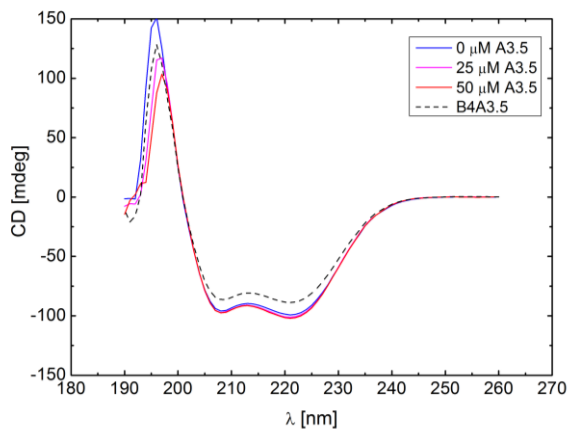

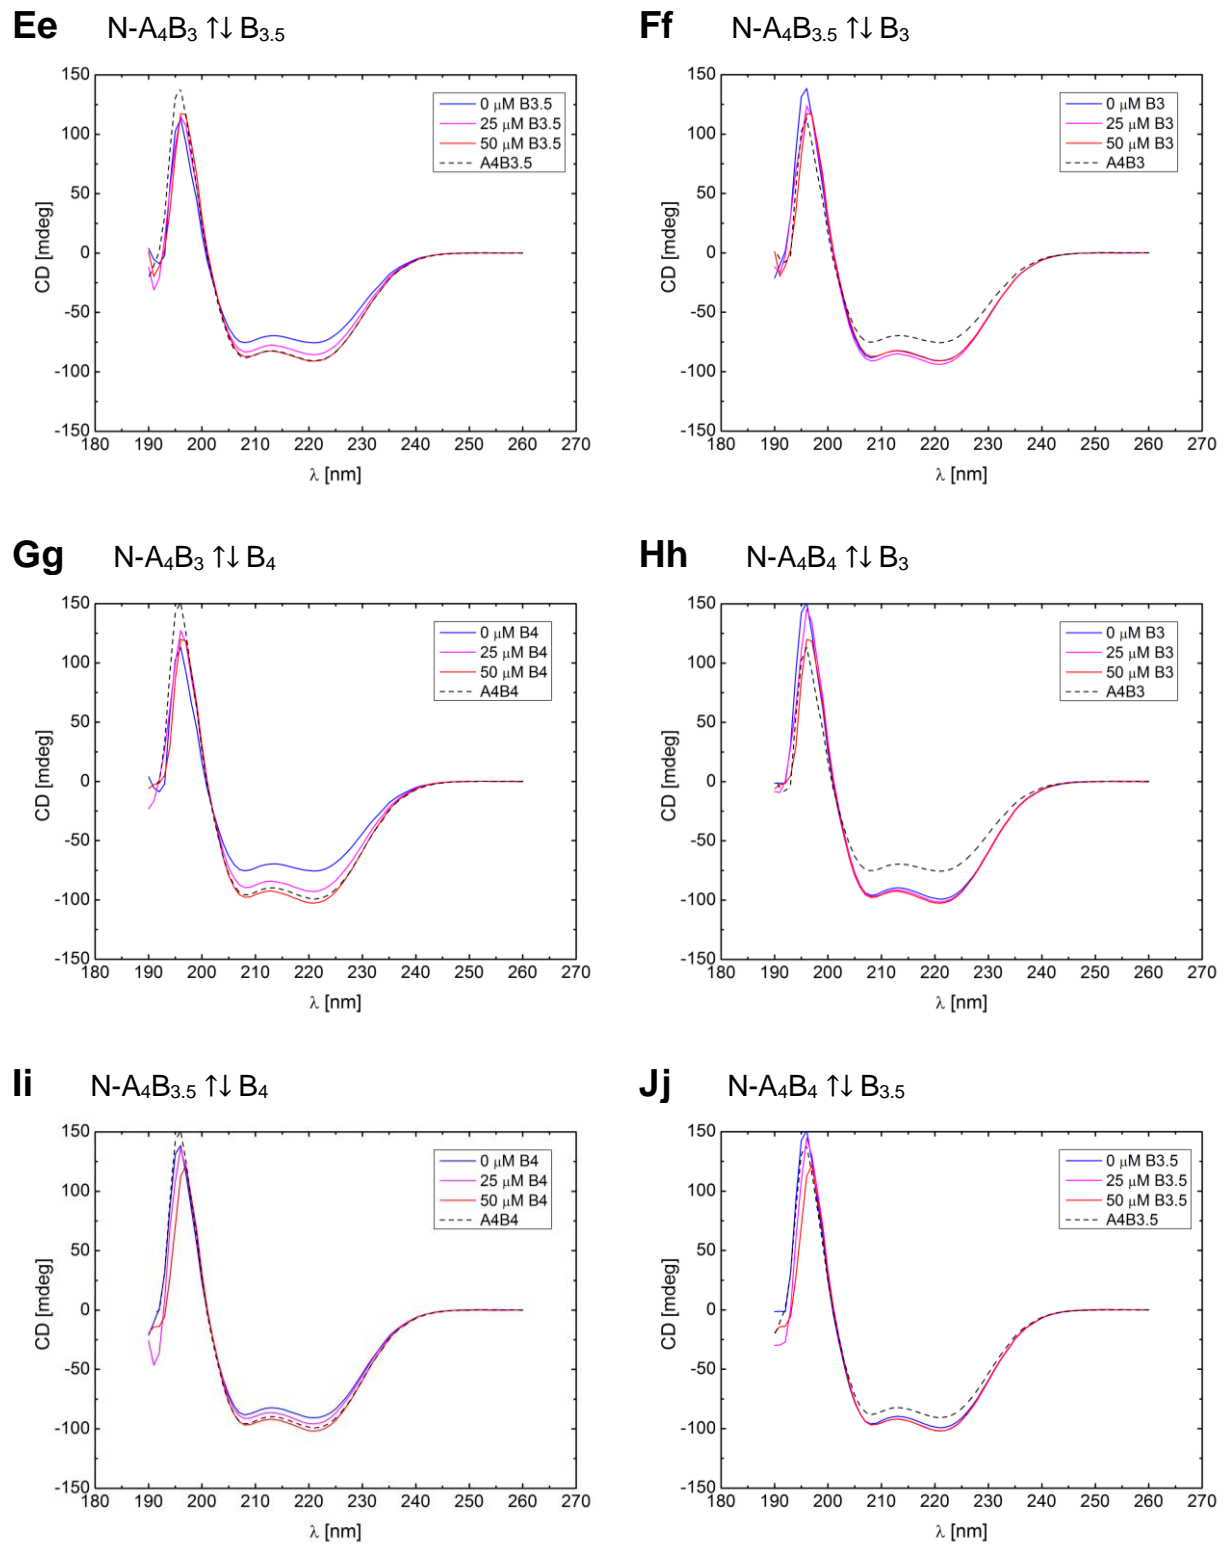

**Figure S3.** CD spectra of CD-titration experiments using the *N*-terminal truncated set of heterodimeric coiled coils. The most stable heterodimeric coiled coil is predominantly formed in solution.

**A** C-A<sub>3</sub>B<sub>3</sub>  $\uparrow\downarrow$  A<sub>3.5</sub>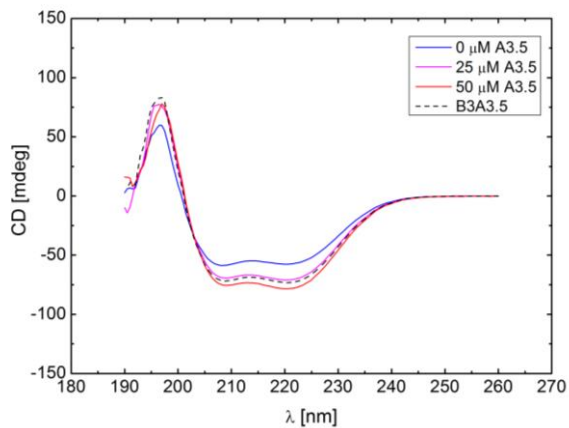**B** C-A<sub>3.5</sub>B<sub>3</sub>  $\uparrow\downarrow$  A<sub>3</sub>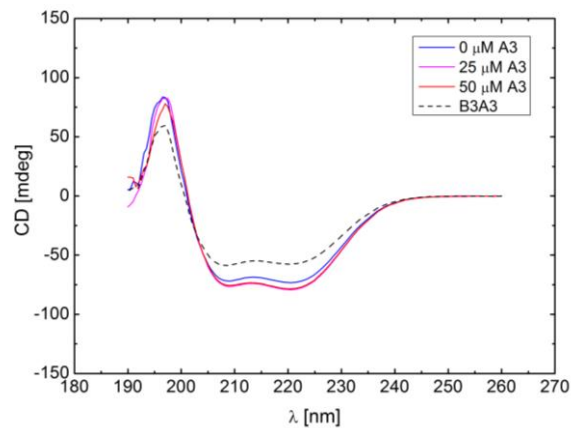**C** C-A<sub>3</sub>B<sub>3</sub>  $\uparrow\downarrow$  A<sub>4</sub>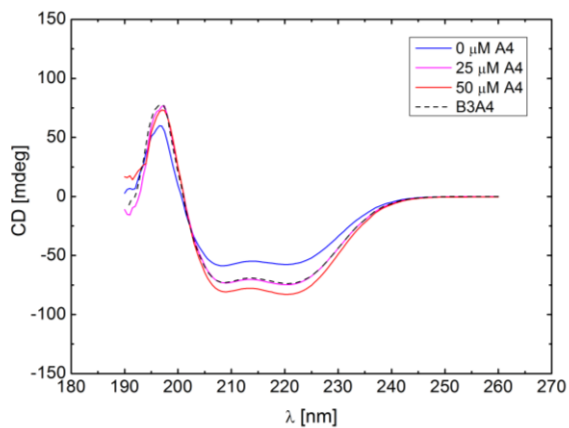**D** C-A<sub>4</sub>B<sub>3</sub>  $\uparrow\downarrow$  A<sub>3</sub>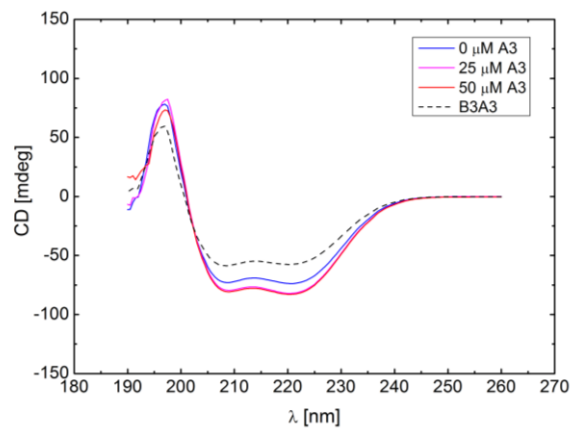**E** C-A<sub>3</sub>B<sub>3</sub>  $\uparrow\downarrow$  B<sub>3.5</sub>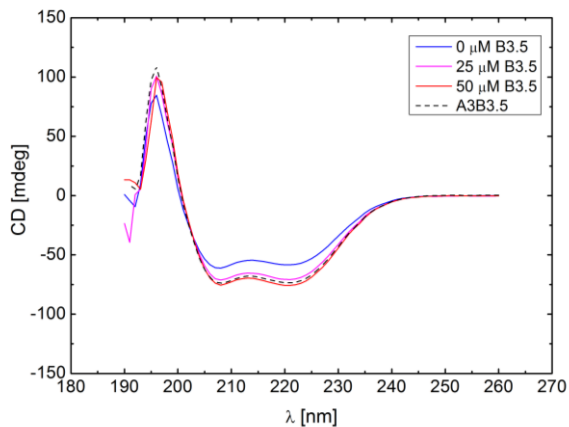**F** C-A<sub>3</sub>B<sub>3.5</sub>  $\uparrow\downarrow$  B<sub>3</sub>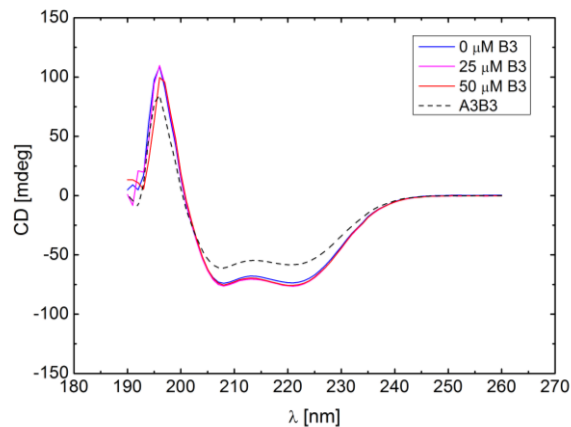



**G** C-A<sub>3</sub>B<sub>3</sub>  $\uparrow\downarrow$  B<sub>4</sub>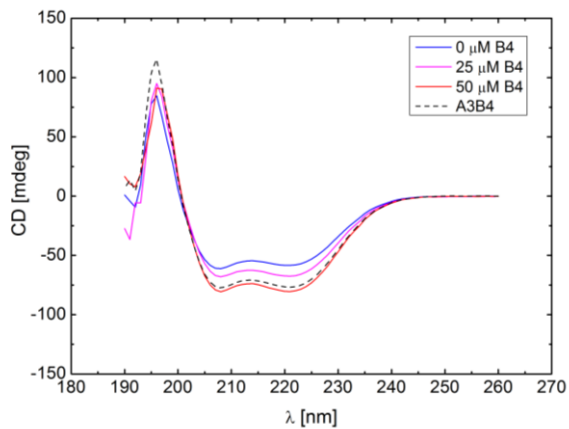**H** C-A<sub>3</sub>B<sub>4</sub>  $\uparrow\downarrow$  B<sub>3</sub>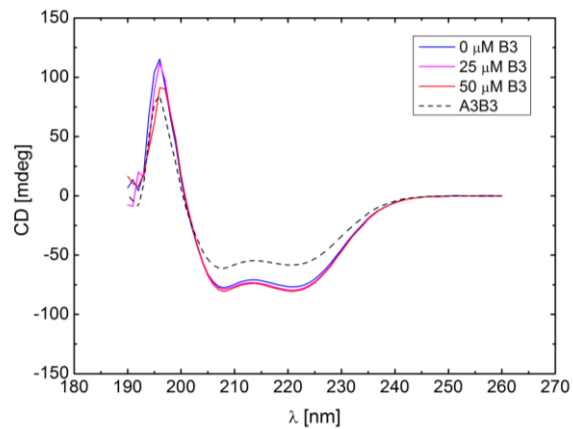**I** C-A<sub>3</sub>B<sub>3.5</sub>  $\uparrow\downarrow$  A<sub>3.5</sub>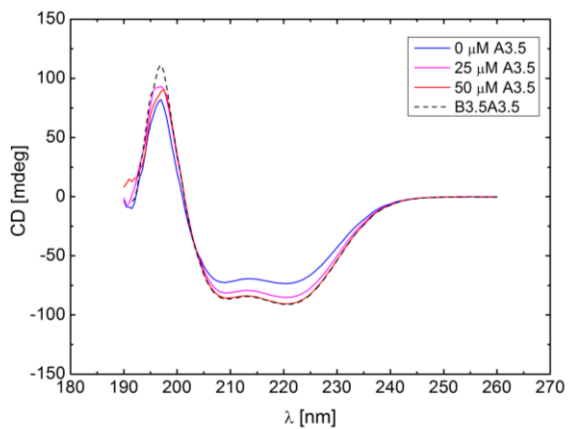**J** C-A<sub>3.5</sub>B<sub>3.5</sub>  $\uparrow\downarrow$  A<sub>3</sub>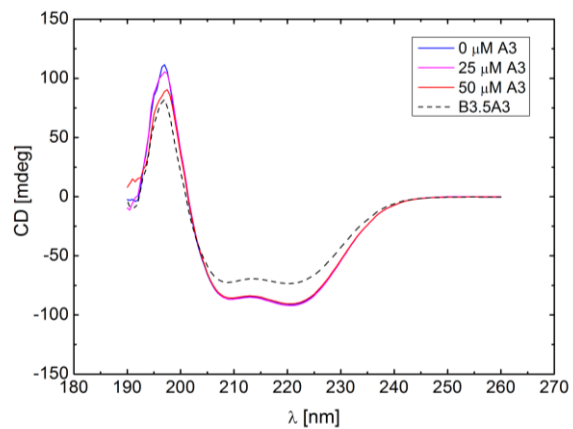**K** C-A<sub>3</sub>B<sub>3.5</sub>  $\uparrow\downarrow$  A<sub>4</sub>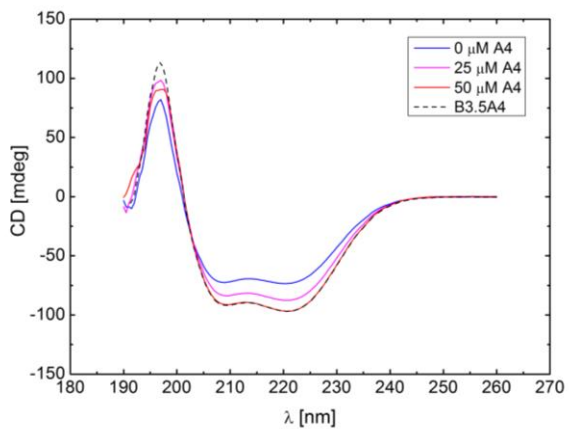**L** C-A<sub>4</sub>B<sub>3.5</sub>  $\uparrow\downarrow$  A<sub>3</sub>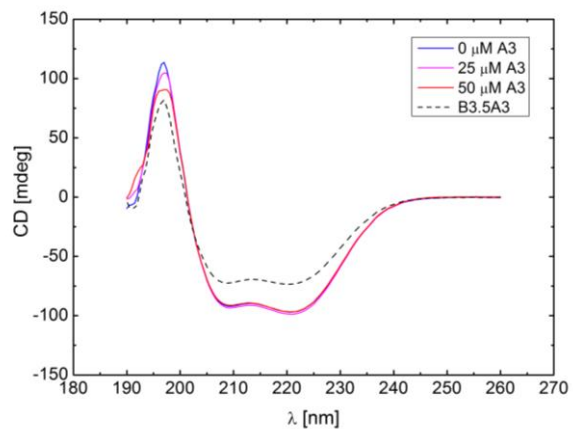

**M** C-A<sub>3</sub>B<sub>3.5</sub>  $\uparrow\downarrow$  B<sub>4</sub>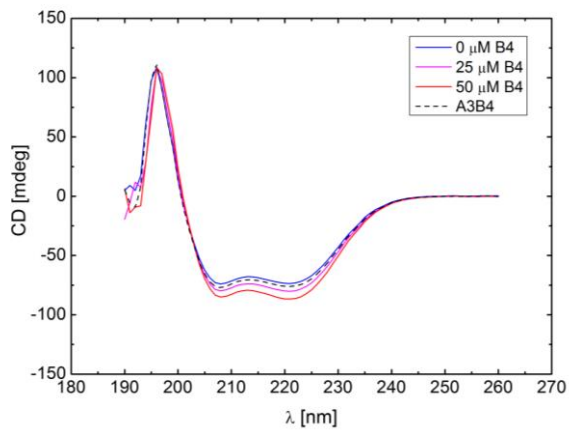**N** C-A<sub>3</sub>B<sub>4</sub>  $\uparrow\downarrow$  B<sub>3.5</sub>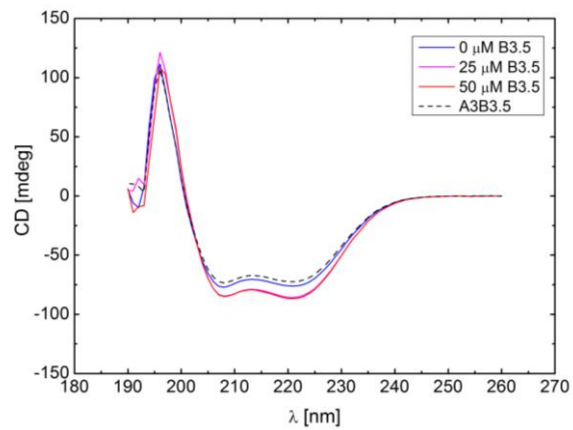**O** C-A<sub>3</sub>B<sub>4</sub>  $\uparrow\downarrow$  A<sub>3.5</sub>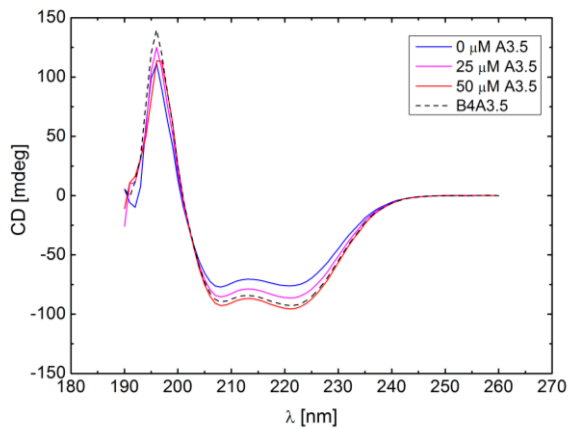**P** C-A<sub>3.5</sub>B<sub>4</sub>  $\uparrow\downarrow$  A<sub>3</sub>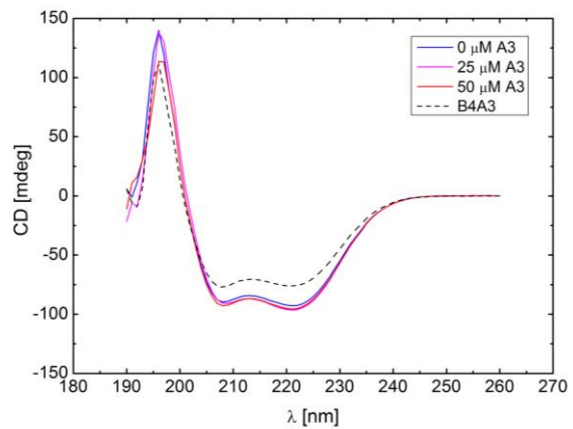**Q** C-A<sub>3</sub>B<sub>4</sub>  $\uparrow\downarrow$  A<sub>4</sub>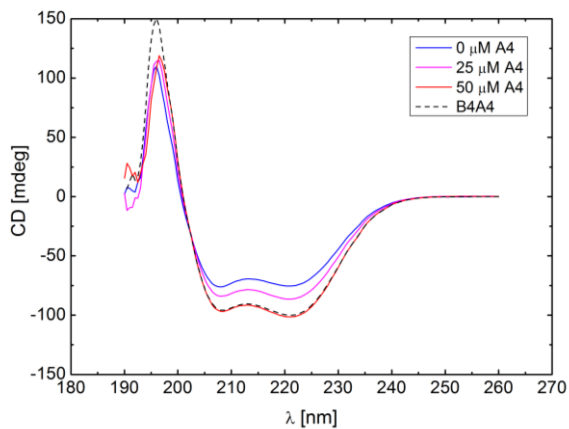**R** C-A<sub>4</sub>B<sub>4</sub>  $\uparrow\downarrow$  A<sub>3</sub>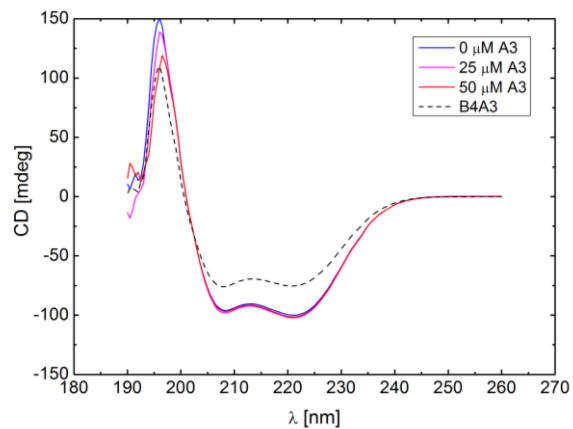

**S** C-A<sub>3.5</sub>B<sub>3</sub> ↑↓ A<sub>4</sub>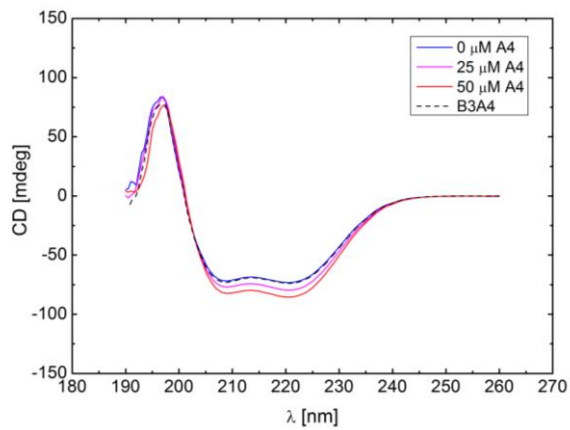**T** C-A<sub>4</sub>B<sub>3</sub> ↑↓ A<sub>3.5</sub>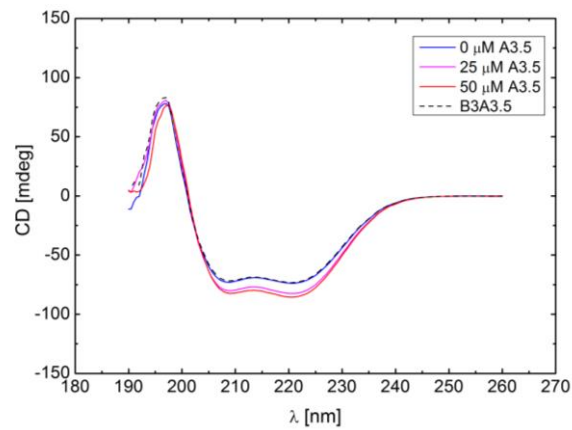**U** C-A<sub>3.5</sub>B<sub>3</sub> ↑↓ B<sub>3.5</sub>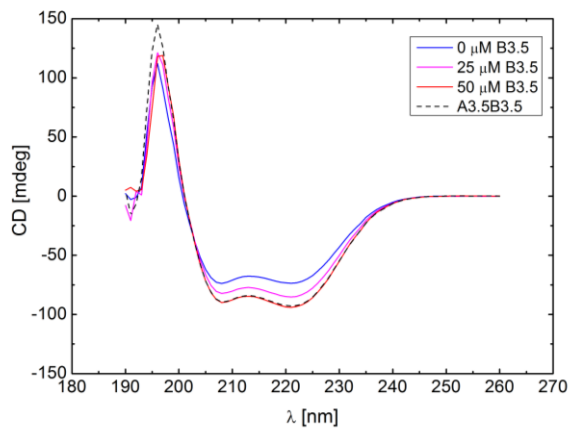**V** C-A<sub>3.5</sub>B<sub>3.5</sub> ↑↓ B<sub>3</sub>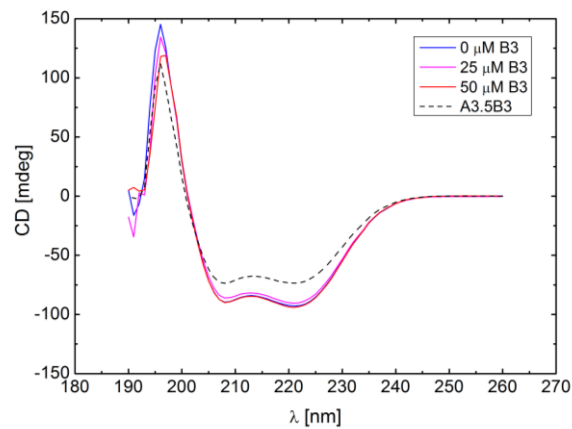**W** C-A<sub>3.5</sub>B<sub>3</sub> ↑↓ B<sub>4</sub>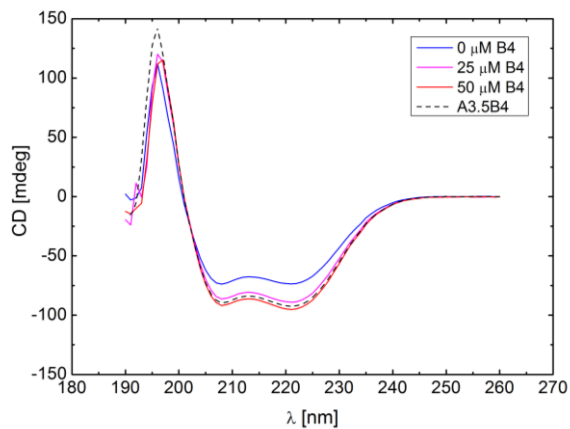**X** C-A<sub>3.5</sub>B<sub>4</sub> ↑↓ B<sub>3</sub>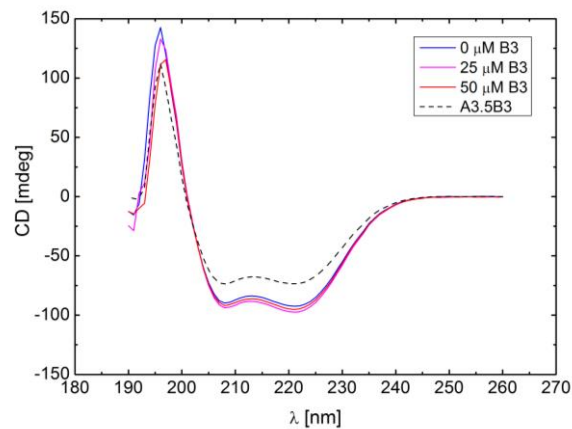

**Y** C-A<sub>3.5</sub>B<sub>3.5</sub>  $\uparrow\downarrow$  A<sub>4</sub>

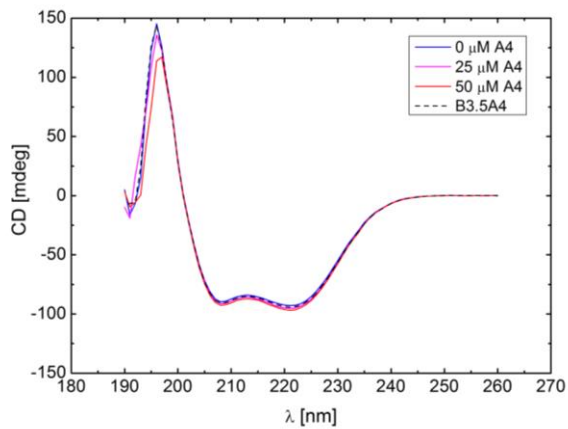

**Z** C-B<sub>3.5</sub>A<sub>4</sub>  $\uparrow\downarrow$  A<sub>3.5</sub>

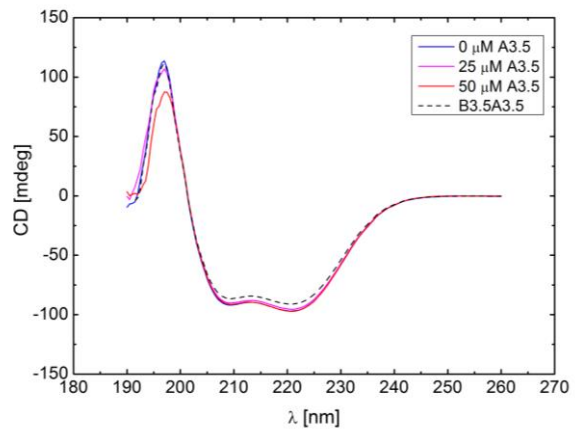

**Aa** C-A<sub>3.5</sub>B<sub>3.5</sub>  $\uparrow\downarrow$  B<sub>4</sub>

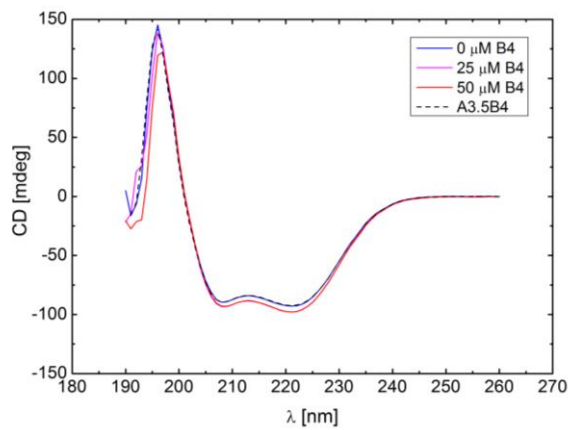

**Bb** C-A<sub>3.5</sub>B<sub>4</sub>  $\uparrow\downarrow$  B<sub>3.5</sub>

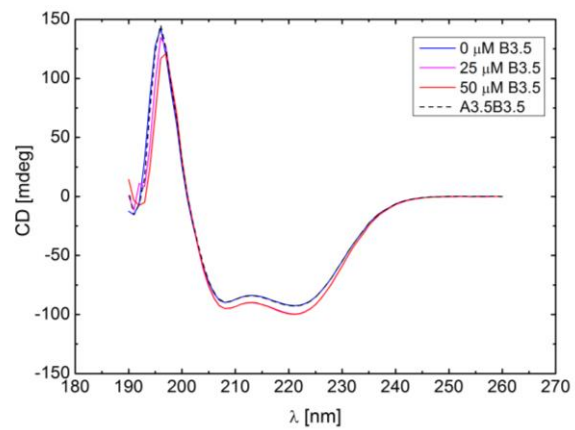

**Cc** C-A<sub>3.5</sub>B<sub>4</sub>  $\uparrow\downarrow$  A<sub>4</sub>

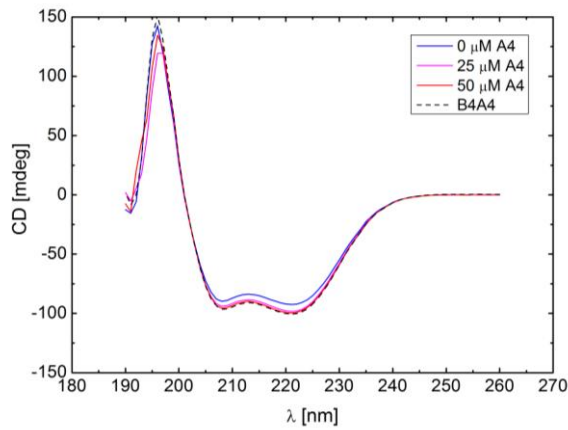

**Dd** C-A<sub>4</sub>B<sub>4</sub>  $\uparrow\downarrow$  A<sub>3.5</sub>

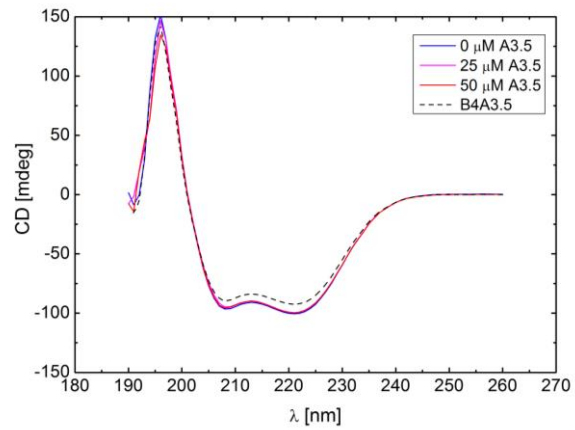

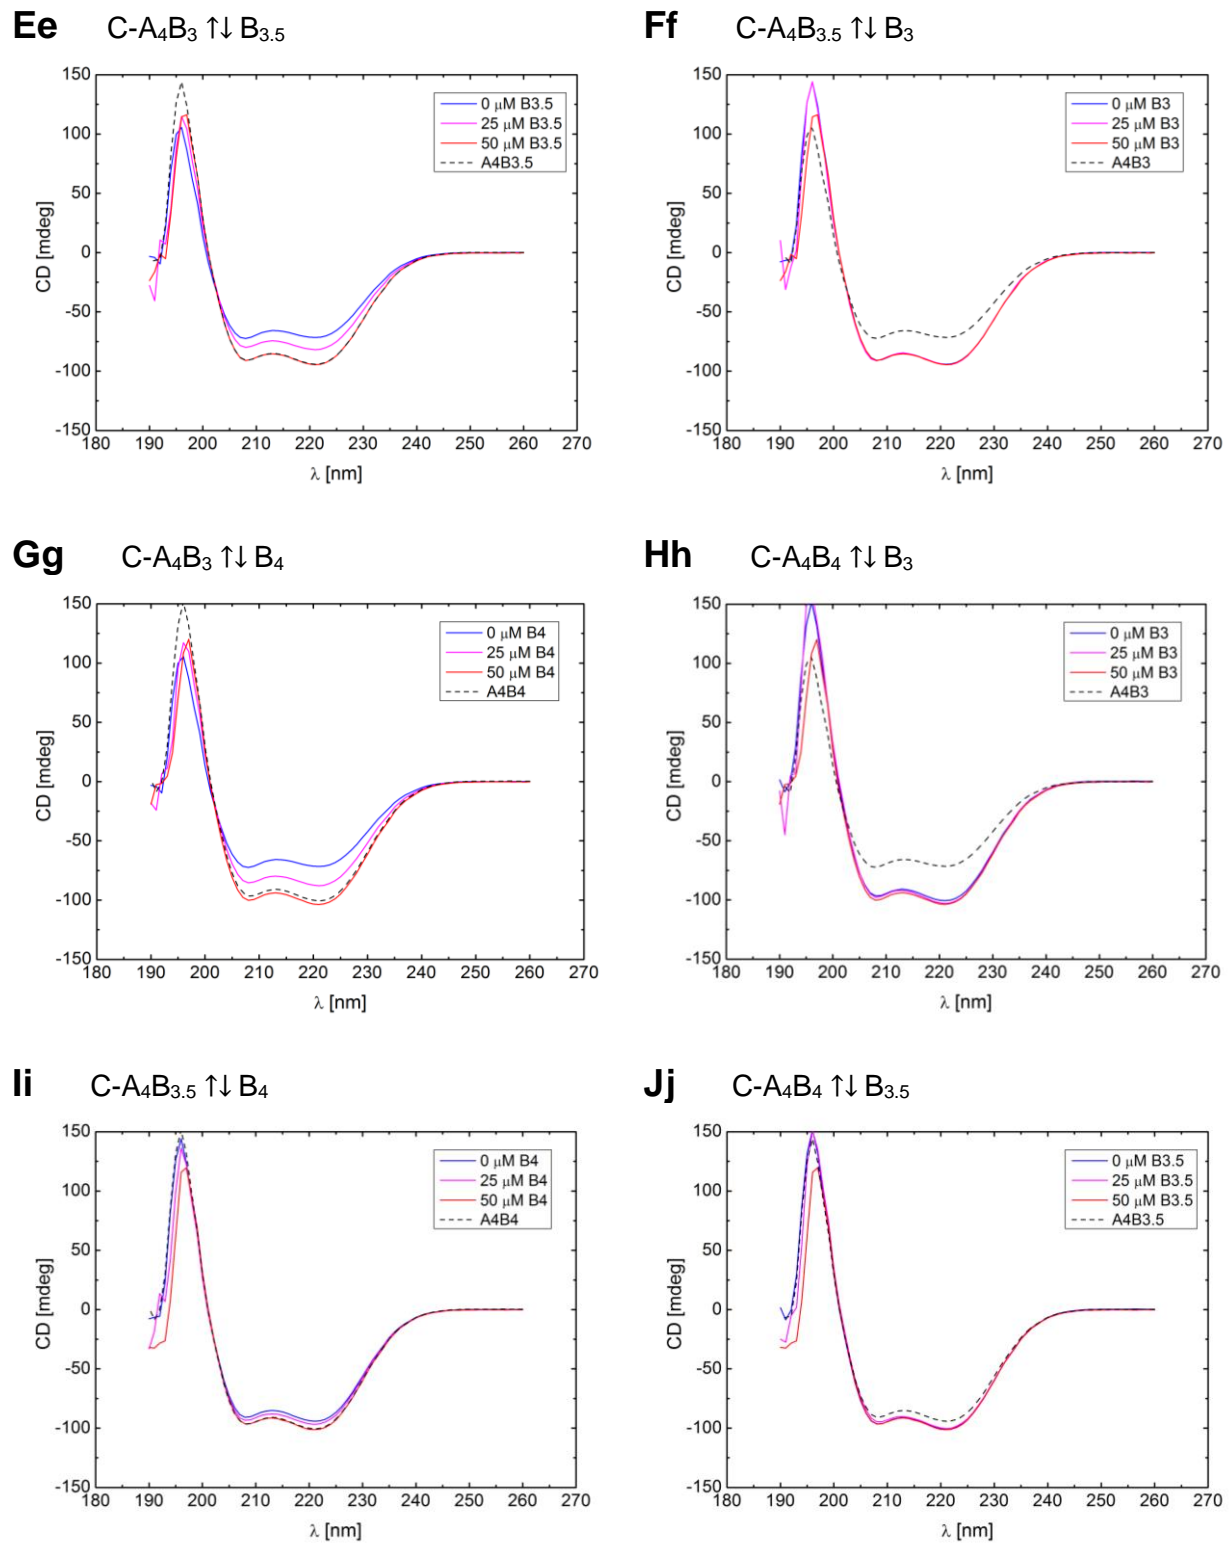

**Figure S4.** CD spectra of CD-titration experiments experiments using the C-terminal truncated set of heterodimeric coiled coils. The most stable heterodimeric coiled coil is predominantly formed in solution.

## 4. FRET-based strand-displacement assay

### *Time-resolved measurement of strand displacement monitored by FRET*

To measure strand-displacement kinetics, A strands with intrinsically fluorescent Trp and Dansyl-labelled B-strands were used as FRET-donor-acceptor pairs ( $\lambda_{\text{ex}} = 270 \text{ nm}$ ,  $\lambda_{\text{em}} = 540 \text{ nm}$ , Table S1). Labelled AB pairs were equilibrated at  $15 \mu\text{M}$  concentration in PBS at  $20 \text{ }^\circ\text{C}$  for 1 h and then at  $4 \text{ }^\circ\text{C}$  for another 15 h in *Microfluor 1* 96 well plates, which were treated with  $300 \mu\text{L}$  per well *Roche*<sup>®</sup> *Blocking reagent* ( $1 \text{ mg/mL}$ ) for 1 h and then washed with PBS ( $3 \times 100 \mu\text{L}$ ) prior to use. We used a *Clariostar* platereader from *BMG Labtech* equipped with a 1 mL dispenser to record decrease of the FRET signal as a result of strand exchange. Strand displacement was performed by injecting equimolar amounts of non-labeled A and B strands (competitor peptide  $P_{\text{comp}}$ ), respectively. First, maximum fluorescence ( $F_{\text{max}}$ ) over 50 s was measured. Then,  $1.5 \mu\text{L}$  of  $1 \text{ mM } P_{\text{comp}}$  were added and strand displacement was followed over 60 s at 540 nm. To obtain minimum fluorescence ( $F_{\text{min}}$ ), another  $5 \mu\text{L}$  of  $P_{\text{comp}}$  were added. Exemplarily, in Figure S5 time-resolved decrease of FRET signal in N-A<sub>3</sub>B<sub>4</sub> upon the addition of non-labelled A<sub>4</sub> is shown. The obtained data was baseline-corrected by  $F_{\text{min}}$ , normalized to  $F_{\text{max}}$  and fitted to a single exponential decay (equation 1, Figures S6-S7).

$$F = F_{\text{eq}} + F_0 e^{-k_{\text{obs}}/t} \quad (1)$$

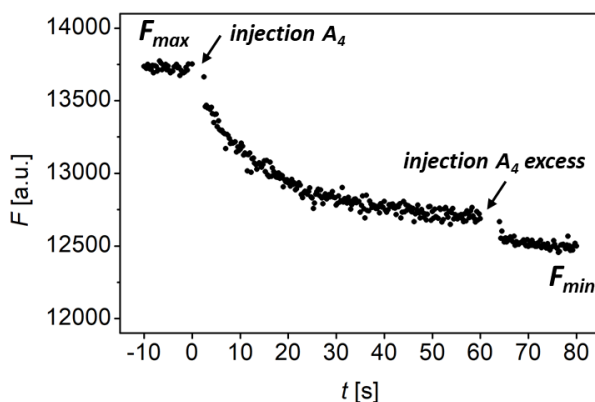

**Figure S5.** Strand displacement in N-A<sub>3</sub>B<sub>4</sub> by A<sub>4</sub>. Labelled N-A<sub>3</sub> and B<sub>4</sub> were equilibrated at  $15 \mu\text{M}$  peptide concentration in PBS. Change in Dansyl fluorescence was recorded at 540 nm. After 50 s equimolar amounts of non-labelled A<sub>4</sub> were added and fluorescence decrease was monitored for 60 s. To determine  $F_{\text{min}}$ , another  $5 \mu\text{L}$  non-labelled A<sub>4</sub> were added.

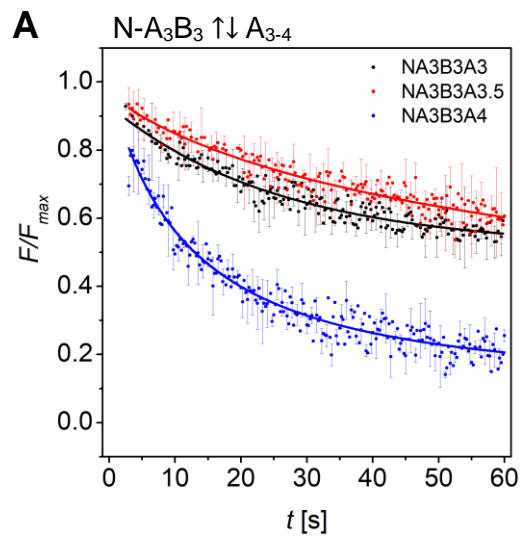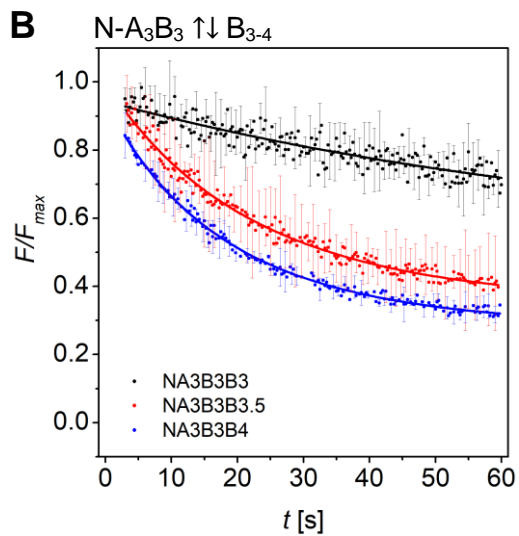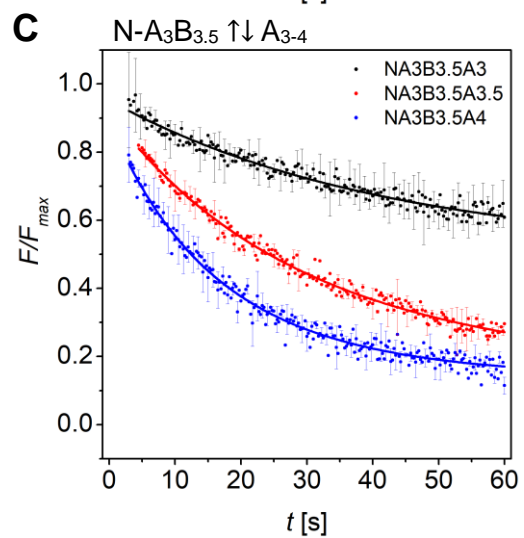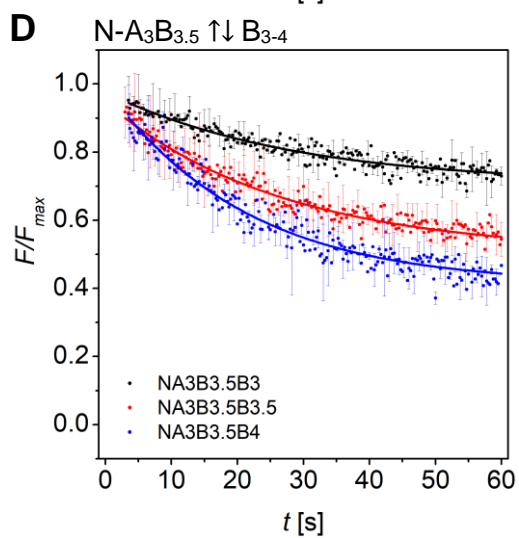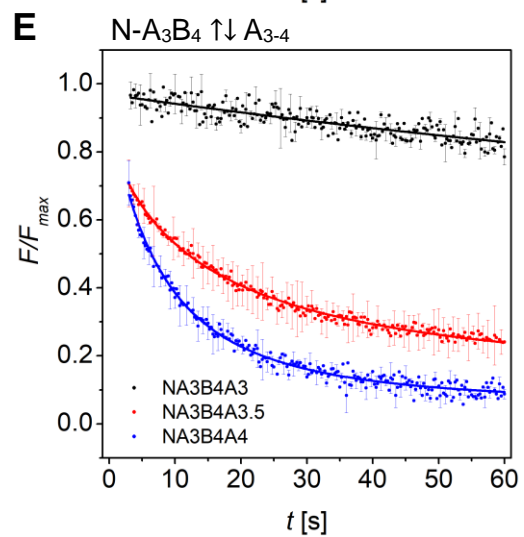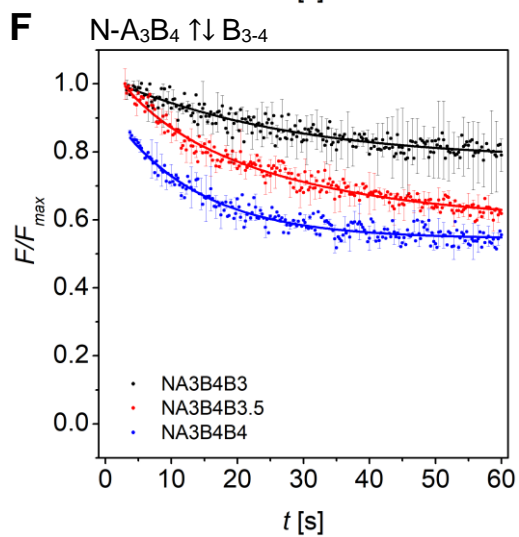

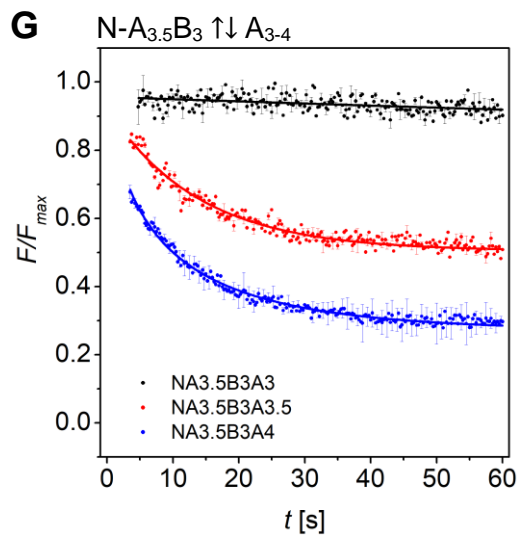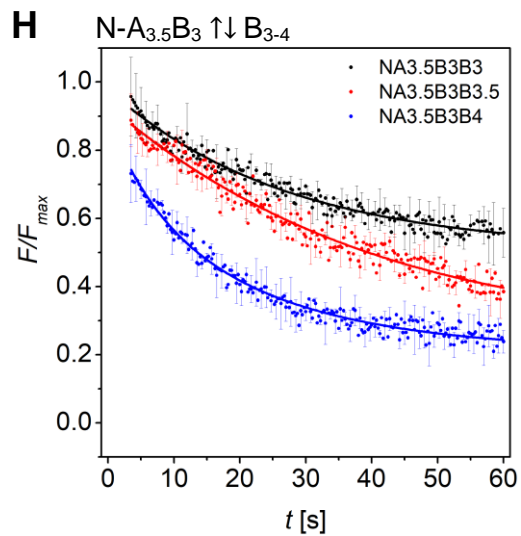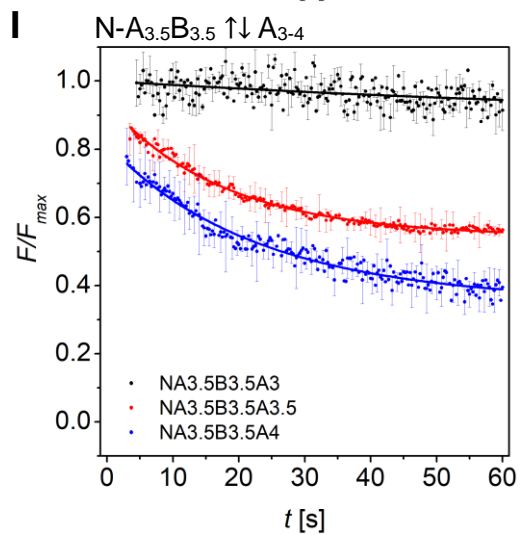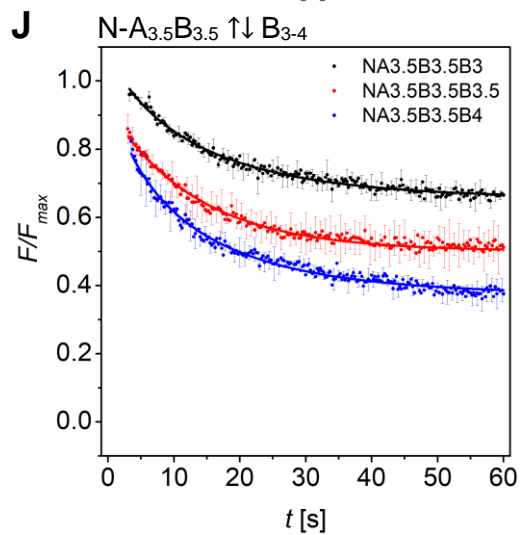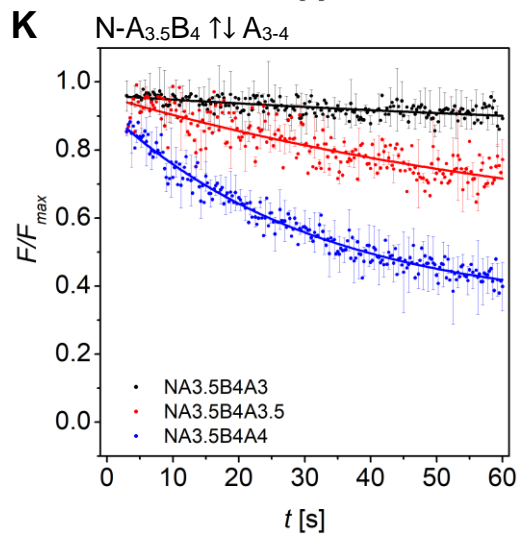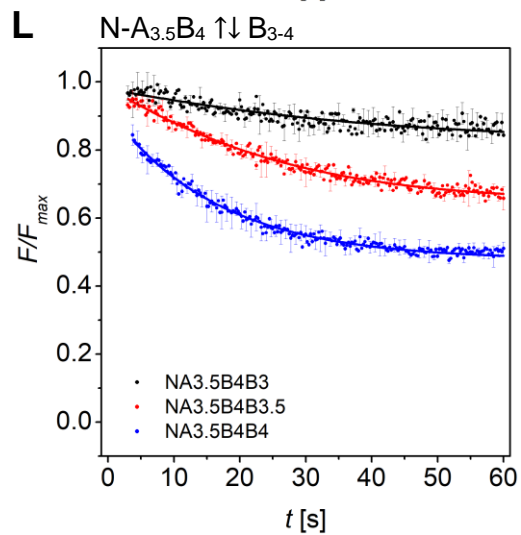



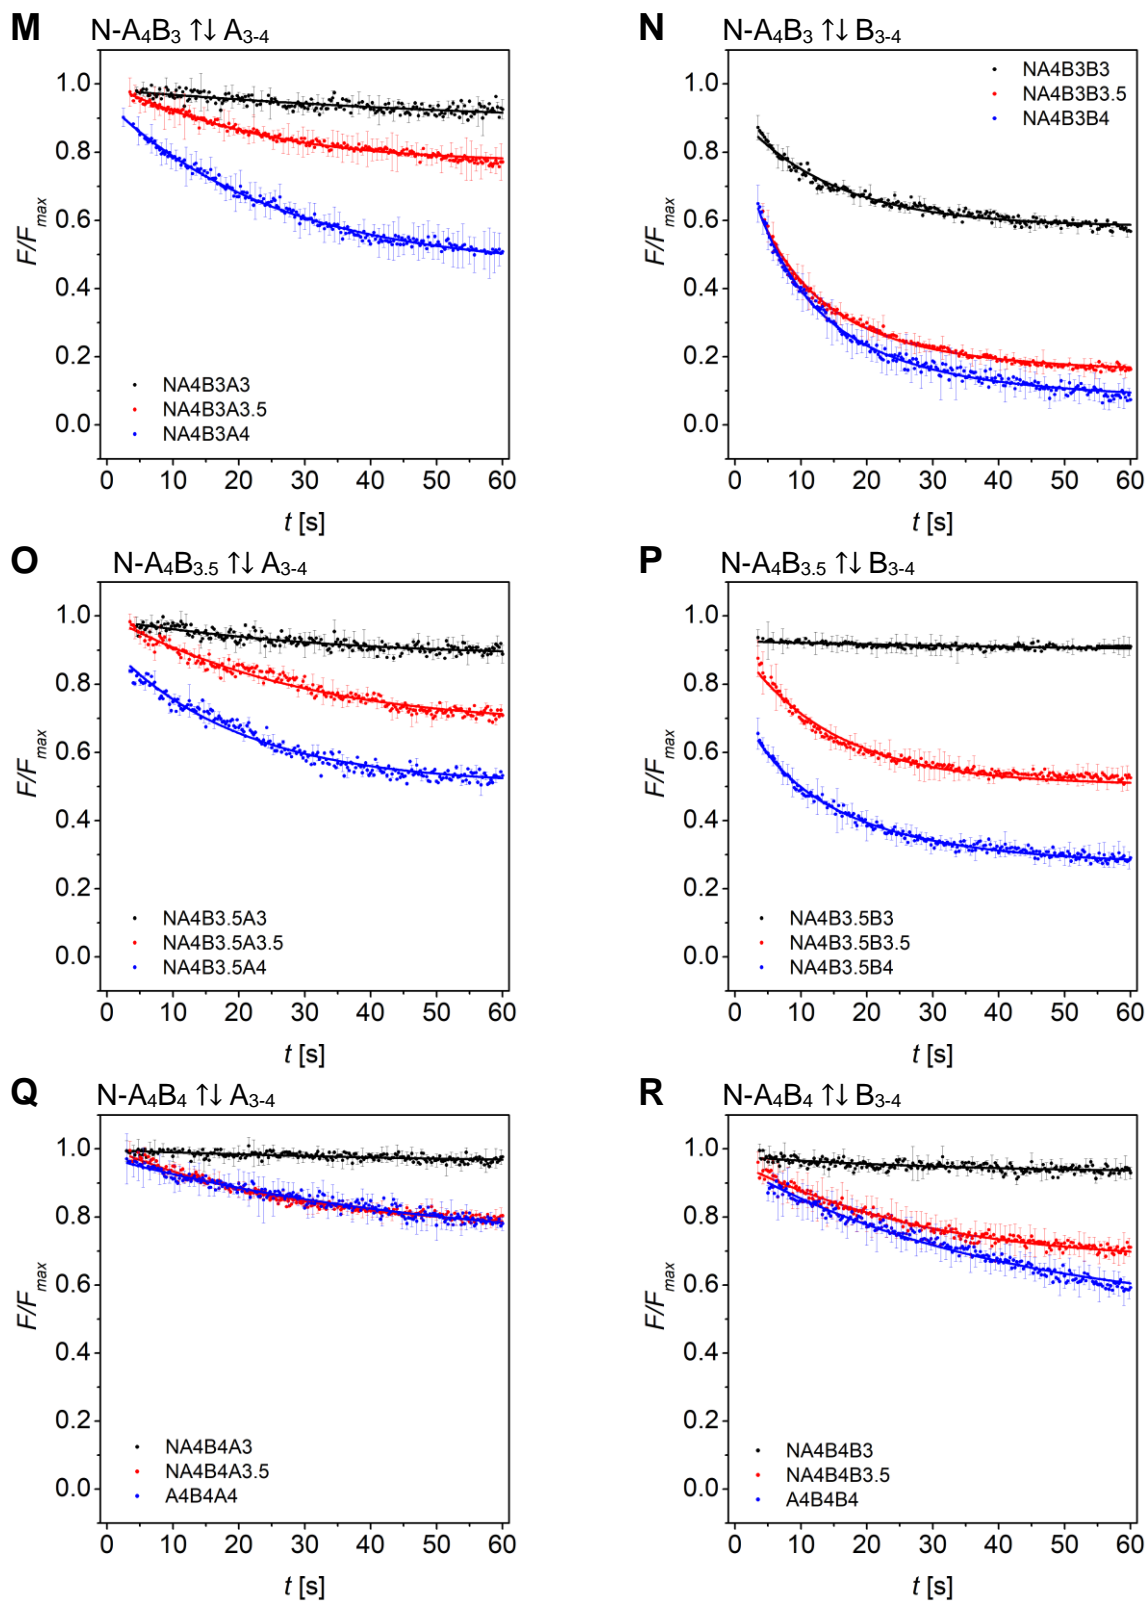

**Figure S6.** Normalized time-resolved fluorescence decrease upon strand displacement in N-A<sub>x</sub>B<sub>y</sub> peptides. Fluorescence data was recorded at Dansyl fluorescence at 540 nm ( $\lambda_{\text{ex}} = 270 \text{ nm}$ ). Data were baseline-corrected by  $F_{\text{min}}$  and normalized to  $F_{\text{max}}$ , respectively, and is the average of three measurements.

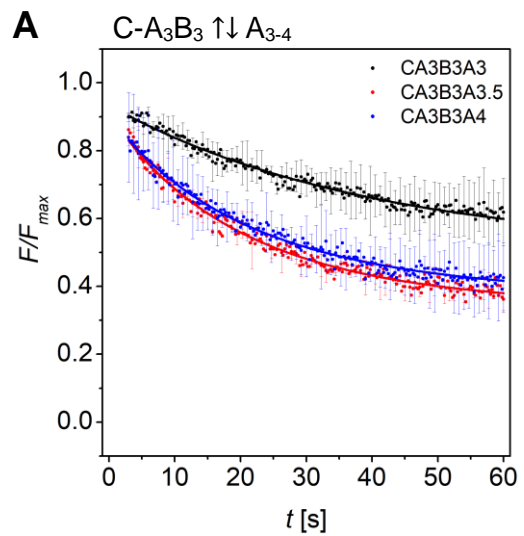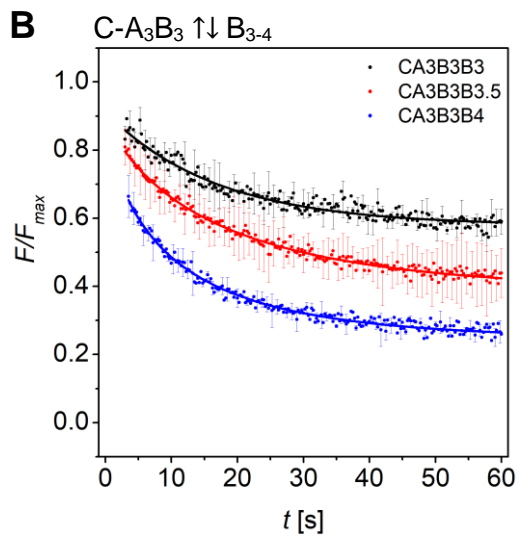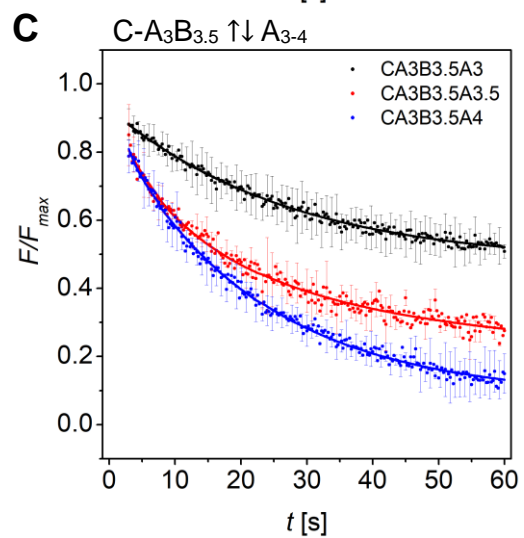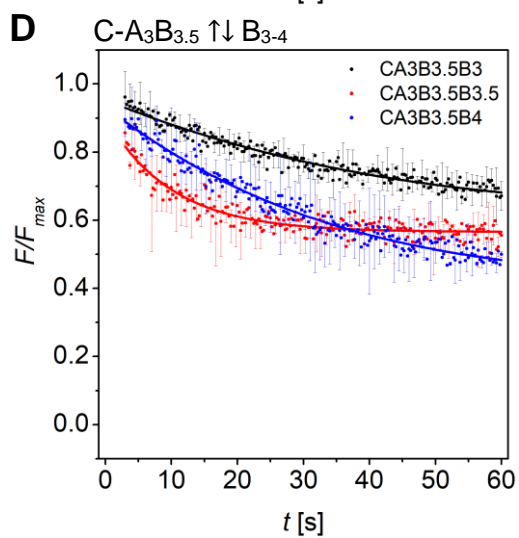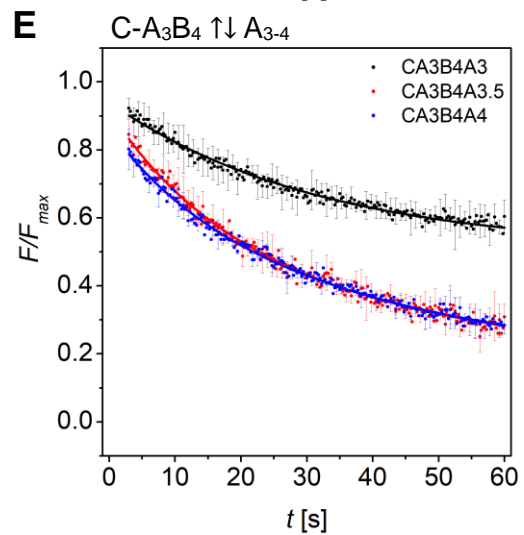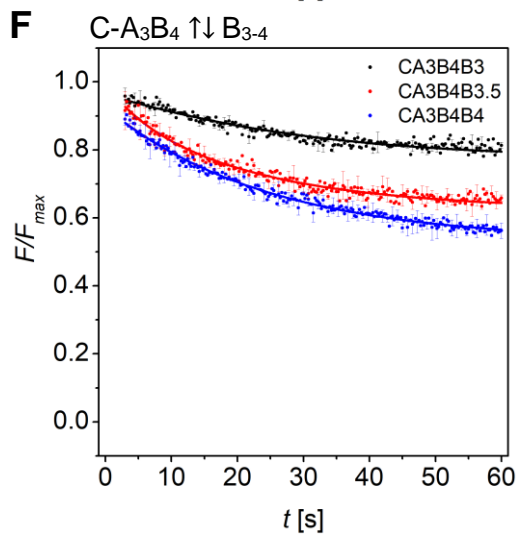

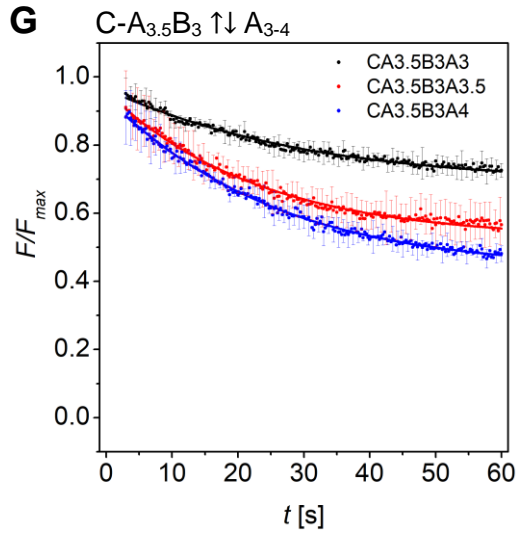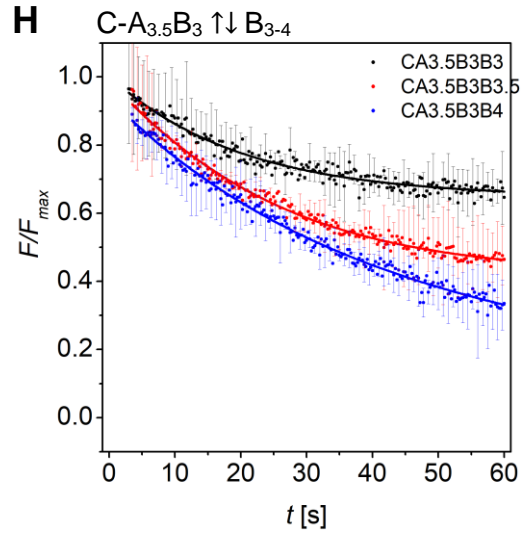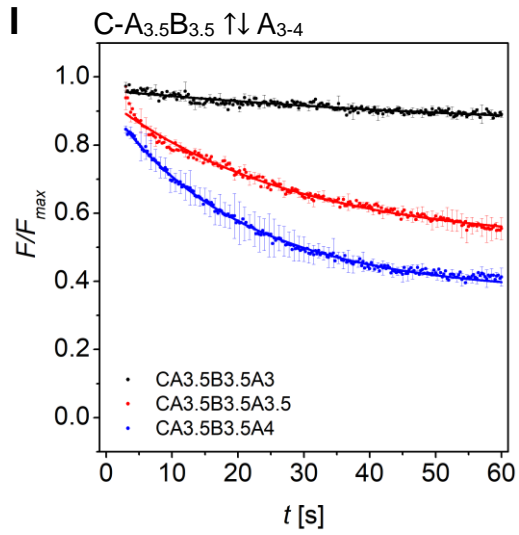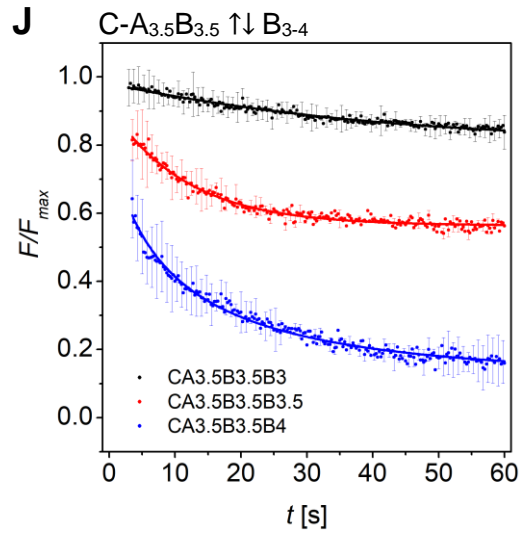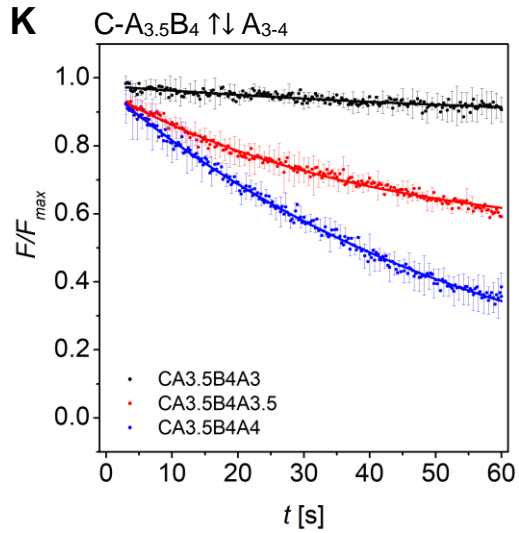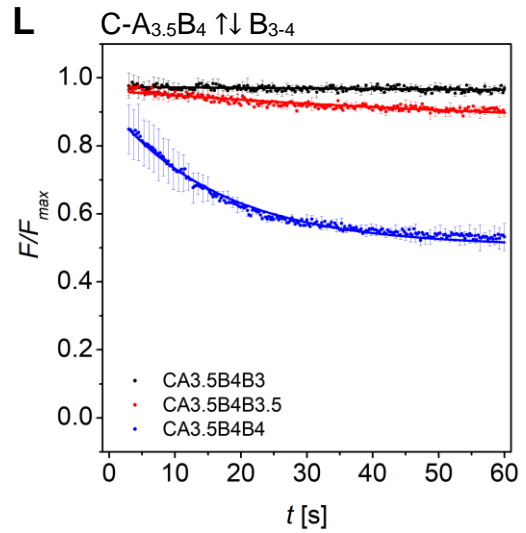

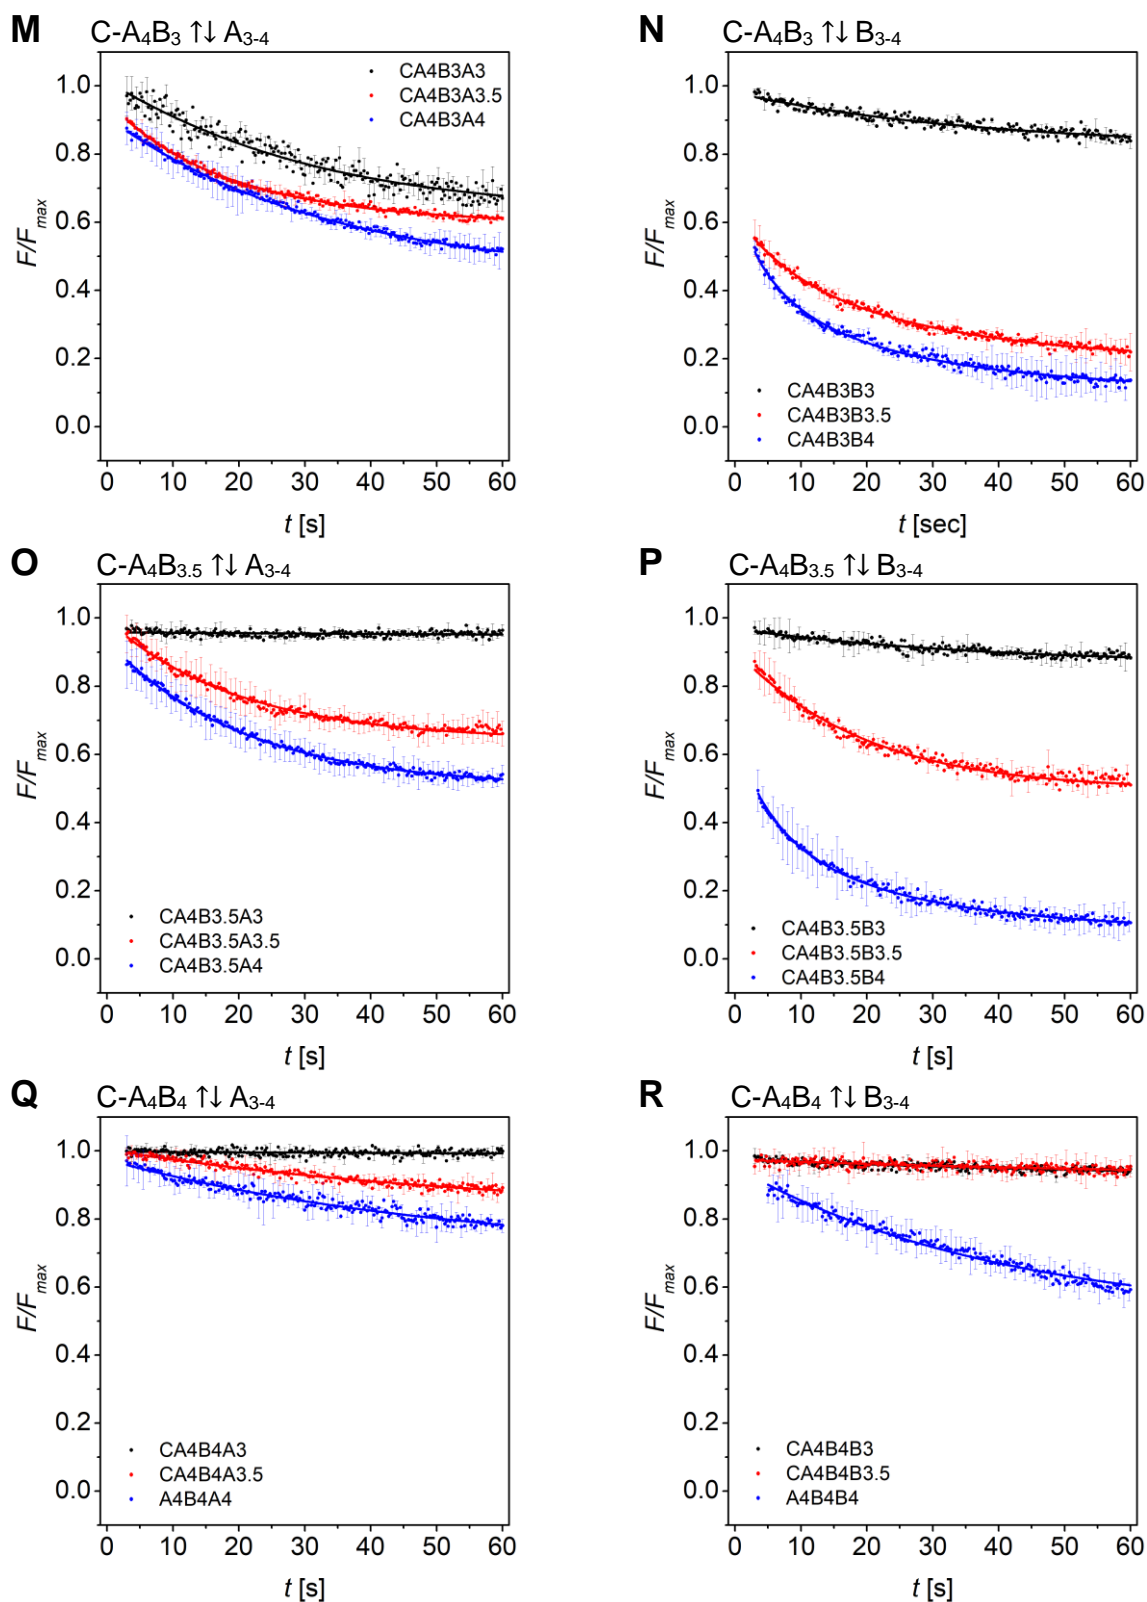

**Figure S7.** Normalized time-resolved fluorescence decrease upon strand displacement in C-A<sub>x</sub>B<sub>y</sub> peptides. Fluorescence data was recorded at Dansyl fluorescence at 540 nm ( $\lambda_{\text{ex}} = 270$  nm). Data were baseline-corrected by  $F_{\text{min}}$  and normalized to  $F_{\text{max}}$ , respectively, and is the average of three measurements.

**Table S5.** Best-fit values of observed rate constants ( $k_{obs}$ ) and half-lives ( $t_{1/2}$ ) of strand displacement in N-A<sub>x</sub>B<sub>y</sub> peptides. Values were obtained from a FRET-based kinetic assay and data fitting by a single exponential decay model ( $k_{obs}$ ,  $t_{1/2}$ ), and by a competitive binding model using DynaFit.<sup>2,3</sup> Overall affinities ( $k_1k_4/k_2k_3$ ) match well with the ratios of the  $K_D$  values determined from CD thermal denaturation curves.

| N-A <sub>x</sub> B <sub>y</sub> peptide |                  | P <sub>comp</sub> | $k_{obs}$ [s <sup>-1</sup> ] | $t_{1/2}$ [s]     |
|-----------------------------------------|------------------|-------------------|------------------------------|-------------------|
| N-A <sub>3</sub>                        | B <sub>3</sub>   | A <sub>3</sub>    | 0.037 ± 0.003                | 17.3 ± 1.4        |
|                                         |                  | A <sub>3.5</sub>  | 0.025 ± 0.003                | 27.7 ± 3.3        |
|                                         |                  | A <sub>4</sub>    | 0.063 ± 0.003                | 11.0 ± 0.5        |
|                                         |                  | B <sub>3</sub>    | 0.010 ± 0.004                | 69.3 ± 27.7       |
|                                         |                  | B <sub>3.5</sub>  | 0.046 ± 0.002                | 15.1 ± 0.7        |
|                                         |                  | B <sub>4</sub>    | 0.055 ± 0.001                | 12.6 ± 0.2        |
|                                         | B <sub>3.5</sub> | A <sub>3</sub>    | 0.025 ± 0.002                | 27.7 ± 2.2        |
|                                         |                  | A <sub>3.5</sub>  | 0.032 ± 0.001                | 21.7 ± 0.5        |
|                                         |                  | A <sub>4</sub>    | 0.058 ± 0.002                | 12.0 ± 0.4        |
|                                         |                  | B <sub>3</sub>    | 0.033 ± 0.003                | 21.0 ± 1.9        |
|                                         |                  | B <sub>3.5</sub>  | 0.045 ± 0.002                | 15.4 ± 0.7        |
|                                         |                  | B <sub>4</sub>    | 0.042 ± 0.002                | 16.5 ± 0.8        |
|                                         | B <sub>4</sub>   | A <sub>3</sub>    | n.a. <sup>a</sup>            | n.a. <sup>a</sup> |
|                                         |                  | A <sub>3.5</sub>  | 0.057 ± 0.001                | 12.2 ± 0.2        |
|                                         |                  | A <sub>4</sub>    | 0.085 ± 0.002                | 8.2 ± 0.2         |
|                                         |                  | B <sub>3</sub>    | 0.040 ± 0.004                | 17.3 ± 1.7        |
|                                         |                  | B <sub>3.5</sub>  | 0.048 ± 0.002                | 14.4 ± 0.6        |
|                                         |                  | B <sub>4</sub>    | 0.076 ± 0.004                | 9.1 ± 0.5         |
| N-A <sub>3.5</sub>                      | B <sub>3</sub>   | A <sub>3</sub>    | n.a. <sup>a</sup>            | n.a. <sup>a</sup> |
|                                         |                  | A <sub>3.5</sub>  | 0.082 ± 0.003                | 8.5 ± 0.3         |
|                                         |                  | A <sub>4</sub>    | 0.087 ± 0.002                | 8.0 ± 0.2         |
|                                         |                  | B <sub>3</sub>    | 0.037 ± 0.002                | 18.7 ± 1.0        |
|                                         |                  | B <sub>3.5</sub>  | 0.029 ± 0.003                | 23.9 ± 2.5        |
|                                         |                  | B <sub>4</sub>    | 0.064 ± 0.002                | 10.8 ± 0.3        |
|                                         | B <sub>3.5</sub> | A <sub>3</sub>    | n.a. <sup>a</sup>            | n.a. <sup>a</sup> |
|                                         |                  | A <sub>3.5</sub>  | 0.056 ± 0.001                | 12.4 ± 0.2        |
|                                         |                  | A <sub>4</sub>    | 0.045 ± 0.002                | 15.4 ± 0.7        |
|                                         |                  | B <sub>3</sub>    | 0.068 ± 0.002                | 10.2 ± 0.3        |
|                                         |                  | B <sub>3.5</sub>  | 0.085 ± 0.002                | 8.2 ± 0.2         |
|                                         |                  | B <sub>4</sub>    | 0.071 ± 0.002                | 9.8 ± 0.3         |
|                                         | B <sub>4</sub>   | A <sub>3</sub>    | n.a. <sup>a</sup>            | n.a. <sup>a</sup> |
|                                         |                  | A <sub>3.5</sub>  | 0.024 ± 0.005                | 28.9 ± 6.0        |
|                                         |                  | A <sub>4</sub>    | 0.033 ± 0.001                | 21.0 ± 0.6        |
|                                         |                  | B <sub>3</sub>    | 0.048 ± 0.005                | 14.4 ± 1.5        |
|                                         |                  | B <sub>3.5</sub>  | 0.040 ± 0.002                | 17.3 ± 0.9        |
|                                         |                  | B <sub>4</sub>    | 0.065 ± 0.001                | 10.7 ± 0.2        |
| N-A <sub>4</sub>                        | B <sub>3</sub>   | A <sub>3</sub>    | 0.032 ± 0.008                | 21.7 ± 5.4        |
|                                         |                  | A <sub>3.5</sub>  | 0.033 ± 0.001                | 21.0 ± 0.6        |
|                                         |                  | A <sub>4</sub>    | 0.039 ± 0.001                | 17.8 ± 0.5        |
|                                         |                  | B <sub>3</sub>    | 0.068 ± 0.002                | 10.2 ± 0.3        |
|                                         |                  | B <sub>3.5</sub>  | 0.079 ± 0.001                | 8.8 ± 0.1         |
|                                         |                  | B <sub>4</sub>    | 0.080 ± 0.001                | 8.7 ± 0.1         |
|                                         | B <sub>3.5</sub> | A <sub>3</sub>    | 0.034 ± 0.006                | 20.4 ± 3.6        |
|                                         |                  | A <sub>3.5</sub>  | 0.027 ± 0.002                | 25.7 ± 1.9        |
|                                         |                  | A <sub>4</sub>    | 0.043 ± 0.002                | 16.1 ± 0.7        |
|                                         |                  | B <sub>3</sub>    | n.a. <sup>a</sup>            | n.a. <sup>a</sup> |
|                                         |                  | B <sub>3.5</sub>  | 0.092 ± 0.001                | 7.5 ± 0.1         |
|                                         |                  | B <sub>4</sub>    | 0.072 ± 0.001                | 9.6 ± 0.1         |
|                                         | B <sub>4</sub>   | A <sub>3</sub>    | n.a. <sup>a</sup>            | n.a. <sup>a</sup> |
|                                         |                  | A <sub>3.5</sub>  | 0.042 ± 0.002                | 16.5 ± 0.8        |
|                                         |                  | A <sub>4</sub>    | 0.019 ± 0.002                | 36.5 ± 3.8        |
|                                         |                  | B <sub>3</sub>    | n.a. <sup>a</sup>            | n.a. <sup>a</sup> |
|                                         |                  | B <sub>3.5</sub>  | 0.042 ± 0.002                | 16.5 ± 0.8        |
|                                         |                  | B <sub>4</sub>    | 0.012 ± 0.001                | 57.8 ± 4.8        |

<sup>a</sup>Data did not fit the single exponential model.

**Table S6.** Best-fit values of observed rate constants ( $k_{obs}$ ) and half-lives ( $t_{1/2}$ ) of strand displacement in C-A<sub>x</sub>B<sub>y</sub> peptides. Values were obtained from a FRET-based kinetic assay and data fitting by a single exponential decay model ( $k_{obs}$ ,  $t_{1/2}$ ), and by a competitive binding model using DynaFit.<sup>2,3</sup> Overall affinities ( $k_1k_4/k_2k_3$ ) match well with the ratios of the  $K_D$  values determined from CD thermal denaturation curves.

| C-A <sub>x</sub> B <sub>y</sub> peptide |                  | P <sub>comp</sub> | $k_{obs}$ [s <sup>-1</sup> ] | $t_{1/2}$ [s]     |
|-----------------------------------------|------------------|-------------------|------------------------------|-------------------|
| C-A <sub>3</sub>                        | B <sub>3</sub>   | A <sub>3</sub>    | 0.034 ± 0.002                | 20.4 ± 1.2        |
|                                         |                  | A <sub>3.5</sub>  | 0.050 ± 0.002                | 13.9 ± 0.6        |
|                                         |                  | A <sub>4</sub>    | 0.044 ± 0.001                | 15.8 ± 0.4        |
|                                         |                  | B <sub>3</sub>    | 0.059 ± 0.003                | 11.7 ± 0.6        |
|                                         |                  | B <sub>3.5</sub>  | 0.057 ± 0.002                | 12.2 ± 0.4        |
|                                         |                  | B <sub>4</sub>    | 0.078 ± 0.002                | 8.9 ± 0.2         |
|                                         | B <sub>3.5</sub> | A <sub>3</sub>    | 0.037 ± 0.001                | 18.7 ± 0.5        |
|                                         |                  | A <sub>3.5</sub>  | 0.055 ± 0.002                | 12.6 ± 0.5        |
|                                         |                  | A <sub>4</sub>    | 0.048 ± 0.001                | 14.4 ± 0.3        |
|                                         |                  | B <sub>3</sub>    | 0.033 ± 0.002                | 21.0 ± 1.3        |
|                                         |                  | B <sub>3.5</sub>  | 0.102 ± 0.006                | 6.8 ± 0.4         |
|                                         |                  | B <sub>4</sub>    | 0.031 ± 0.002                | 22.4 ± 1.4        |
|                                         | B <sub>4</sub>   | A <sub>3</sub>    | 0.039 ± 0.001                | 17.8 ± 0.5        |
|                                         |                  | A <sub>3.5</sub>  | 0.039 ± 0.001                | 17.8 ± 0.5        |
|                                         |                  | A <sub>4</sub>    | 0.036 ± 0.001                | 19.3 ± 0.5        |
|                                         |                  | B <sub>3</sub>    | 0.050 ± 0.003                | 13.9 ± 0.8        |
|                                         |                  | B <sub>3.5</sub>  | 0.060 ± 0.002                | 11.6 ± 0.4        |
|                                         |                  | B <sub>4</sub>    | 0.041 ± 0.001                | 16.9 ± 0.4        |
| C-A <sub>3.5</sub>                      | B <sub>3</sub>   | A <sub>3</sub>    | 0.041 ± 0.001                | 16.9 ± 0.4        |
|                                         |                  | A <sub>3.5</sub>  | 0.050 ± 0.001                | 13.9 ± 0.3        |
|                                         |                  | A <sub>4</sub>    | 0.040 ± 0.001                | 17.3 ± 0.4        |
|                                         |                  | B <sub>3</sub>    | 0.050 ± 0.002                | 13.9 ± 0.6        |
|                                         |                  | B <sub>3.5</sub>  | 0.040 ± 0.001                | 17.3 ± 0.4        |
|                                         |                  | B <sub>4</sub>    | 0.024 ± 0.001                | 28.9 ± 1.2        |
|                                         | B <sub>3.5</sub> | A <sub>3</sub>    | 0.030 ± 0.004                | 23.1 ± 3.1        |
|                                         |                  | A <sub>3.5</sub>  | 0.036 ± 0.001                | 19.3 ± 0.5        |
|                                         |                  | A <sub>4</sub>    | 0.053 ± 0.001                | 13.1 ± 0.3        |
|                                         |                  | B <sub>3</sub>    | 0.032 ± 0.002                | 21.7 ± 1.4        |
|                                         |                  | B <sub>3.5</sub>  | 0.088 ± 0.003                | 7.9 ± 0.3         |
|                                         |                  | B <sub>4</sub>    | 0.060 ± 0.002                | 11.6 ± 0.4        |
|                                         | B <sub>4</sub>   | A <sub>3</sub>    | n.a. <sup>a</sup>            | n.a. <sup>a</sup> |
|                                         |                  | A <sub>3.5</sub>  | 0.022 ± 0.001                | 31.5 ± 1.4        |
|                                         |                  | A <sub>4</sub>    | 0.017 ± 0.001                | 40.8 ± 2.4        |
|                                         |                  | B <sub>3</sub>    | n.a. <sup>a</sup>            | n.a. <sup>a</sup> |
|                                         |                  | B <sub>3.5</sub>  | 0.046 ± 0.004                | 15.1 ± 1.3        |
|                                         |                  | B <sub>4</sub>    | 0.074 ± 0.001                | 9.4 ± 0.1         |
| C-A <sub>4</sub>                        | B <sub>3</sub>   | A <sub>3</sub>    | 0.025 ± 0.003                | 27.7 ± 3.3        |
|                                         |                  | A <sub>3.5</sub>  | 0.054 ± 0.001                | 12.8 ± 0.2        |
|                                         |                  | A <sub>4</sub>    | 0.030 ± 0.001                | 23.1 ± 0.8        |
|                                         |                  | B <sub>3</sub>    | 0.026 ± 0.003                | 26.7 ± 3.1        |
|                                         |                  | B <sub>3.5</sub>  | 0.054 ± 0.001                | 12.8 ± 0.2        |
|                                         |                  | B <sub>4</sub>    | 0.063 ± 0.002                | 11.0 ± 0.3        |
|                                         | B <sub>3.5</sub> | A <sub>3</sub>    | n.a. <sup>a</sup>            | n.a. <sup>a</sup> |
|                                         |                  | A <sub>3.5</sub>  | 0.059 ± 0.001                | 11.7 ± 0.2        |
|                                         |                  | A <sub>4</sub>    | 0.049 ± 0.001                | 14.1 ± 0.3        |
|                                         |                  | B <sub>3</sub>    | 0.034 ± 0.004                | 20.4 ± 2.4        |
|                                         |                  | B <sub>3.5</sub>  | 0.061 ± 0.002                | 11.4 ± 0.4        |
|                                         |                  | B <sub>4</sub>    | 0.067 ± 0.001                | 10.3 ± 0.2        |
|                                         | B <sub>4</sub>   | A <sub>3</sub>    | n.a. <sup>a</sup>            | n.a. <sup>a</sup> |
|                                         |                  | A <sub>3.5</sub>  | 0.018 ± 0.002                | 38.5 ± 4.3        |
|                                         |                  | A <sub>4</sub>    | 0.019 ± 0.002                | 36.5 ± 3.8        |
|                                         |                  | B <sub>3</sub>    | n.a. <sup>a</sup>            | n.a. <sup>a</sup> |
|                                         |                  | B <sub>3.5</sub>  | n.a. <sup>a</sup>            | n.a. <sup>a</sup> |
|                                         |                  | B <sub>4</sub>    | 0.012 ± 0.001                | 57.8 ± 4.8        |

<sup>a</sup>Data did not fit the single exponential model.

### *Kinetic analysis of the time-resolved displacement using DynaFit*

Fluorescence data of time-resolved strand displacement were fit to a competitive binding model using the fitting software DynaFit.<sup>2,3</sup> DynaFit uses a general numerical method for the determination of rate constants that characterize simultaneous and competitive binding of a ligand to two receptors R<sub>1</sub> and R<sub>2</sub> presuming a dissociative pathway for receptor displacement. In the context of heterodimeric coiled coils of the type AB R<sub>1</sub> and R<sub>2</sub> can be regarded as A and A<sub>comp</sub> or as B and B<sub>comp</sub>, respectively. A dissociative pathway for coil-strand displacement can be presumed as the underlying coiled-coil design results in non-promiscuous coiled-coil interaction.

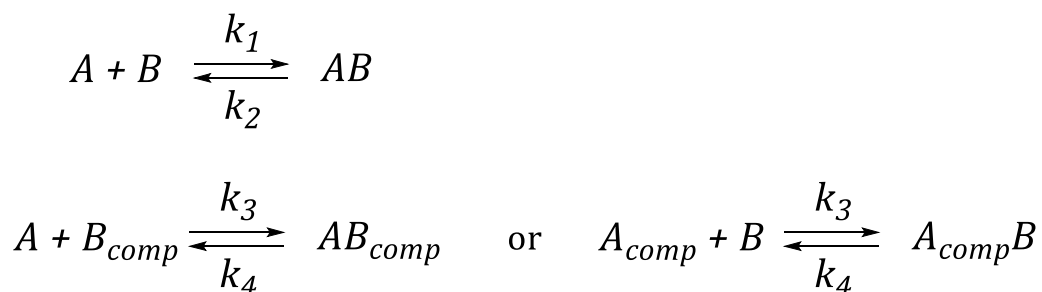

**Scheme S1.** Presumed dissociative mechanism of strand-displacement in AB heterodimeric coiled coils.

The time-resolved fluorescence data was converted into concentration of free A or B in the time course of displacement by A<sub>comp</sub> or B<sub>comp</sub> and competitive reformation of the AB coiled coil. Therefore,  $F_{max}$  was assigned to zero conversion of the initial AB coiled-coil complex (15 μM AB and 15 μM P<sub>comp</sub>) and  $F_{min}$  was assigned to full strand displacement in AB (15 μM AB<sub>comp</sub> or A<sub>comp</sub>B and 15 μM A or B) to AP<sub>comp</sub> or P<sub>comp</sub>B, respectively. We presumed that strand-displacement kinetics are the same in coiled coils of the same lengths of the individual strands whether or not labelled or unlabelled. Fitting of both events, displacement of A or B from the initial AB complex and re-association, gives relative rate constants  $k_1$  to  $k_4$  from which the overall affinities ( $k_1k_4/k_2k_3$ ) can be calculated. The results are summarized in tables S5 and S6. The curve fitting is shown in figures S8-S13.

**Table S 7.** Best-fit values of rate constants of competitive strand displacement in N-A<sub>x</sub>B<sub>y</sub> peptides obtained from DynaFit analysis. Ratio of overall affinities ( $k_1k_4/k_2k_3$ ) matches well with the ratio of the  $K_D$  values determined from CD thermal denaturation curves.  $P_{comp}$  is the general term for peptide competitor (A<sub>comp</sub> or B<sub>comp</sub>).

| AB peptide         | $P_{comp}$       | $k_1 [\mu M^{-1}s^{-1}]$ | $k_2 [s^{-1}]$ | $k_3 [\mu M^{-1}s^{-1}]$      | $k_4 [s^{-1}]$                | $k_1k_4/k_2k_3$               | $K_D(comp)/K_D$ |         |
|--------------------|------------------|--------------------------|----------------|-------------------------------|-------------------------------|-------------------------------|-----------------|---------|
| N-A <sub>3</sub>   | B <sub>3</sub>   | A <sub>3</sub>           | 0.14 ± 0.05    | 0.02 ± 0.002                  | 0.15 ± 0.04                   | 0.02 ± 0.002                  | 0.93            | 1.0     |
|                    |                  | A <sub>3.5</sub>         | 0.16 ± 0.08    | 0.019 ± 0.004                 | 0.05 ± 0.01                   | $(7.0 \pm 1.2) \cdot 10^{-4}$ | 0.12            | 0.18    |
|                    |                  | A <sub>4</sub>           | 0.19 ± 0.07    | 0.064 ± 0.004                 | 0.28 ± 0.08                   | $(1.7 \pm 0.2) \cdot 10^{-3}$ | 0.02            | 0.06    |
|                    |                  | B <sub>3</sub>           | 0.10 ± 0.03    | $(6.0 \pm 0.8) \cdot 10^{-3}$ | 0.10 ± 0.04                   | $(6.0 \pm 0.8) \cdot 10^{-3}$ | 1.0             | 1.0     |
|                    |                  | B <sub>3.5</sub>         | 0.20 ± 0.05    | 0.03 ± 0.002                  | 0.38 ± 0.06                   | 0.01 ± 0.0008                 | 0.18            | 0.43    |
|                    | B <sub>4</sub>   | 0.21 ± 0.05              | 0.04 ± 0.002   | 0.32 ± 0.07                   | $(9.0 \pm 0.6) \cdot 10^{-3}$ | 0.15                          | 0.20            |         |
|                    | B <sub>3.5</sub> | A <sub>3</sub>           | 0.29 ± 0.08    | 0.012 ± 0.0007                | 0.29 ± 0.06                   | 0.012 ± 0.0007                | 1.0             | 1.0     |
|                    |                  | A <sub>3.5</sub>         | 0.30 ± 0.13    | 0.03 ± 0.002                  | 0.80 ± 0.24                   | $(1.2 \pm 0.2) \cdot 10^{-3}$ | 0.02            | 0.003   |
|                    |                  | A <sub>4</sub>           | 0.28 ± 0.07    | 0.056 ± 0.002                 | 0.88 ± 0.17                   | $(3.4 \pm 0.3) \cdot 10^{-3}$ | 0.02            | < 0.001 |
|                    |                  | B <sub>3</sub>           | 0.20 ± 0.05    | 0.01 ± 0.0007                 | 0.13 ± 0.03                   | 0.03 ± 0.002                  | 4.6             | 2.3     |
|                    |                  | B <sub>3.5</sub>         | 0.36 ± 0.12    | 0.02 ± 0.001                  | 0.36 ± 0.10                   | 0.02 ± 0.001                  | 1.0             | 1.0     |
|                    | B <sub>4</sub>   | 0.36 ± 0.11              | 0.024 ± 0.001  | 0.77 ± 0.19                   | 0.023 ± 0.002                 | 0.45                          | 0.46            |         |
|                    | B <sub>4</sub>   | A <sub>3</sub>           | 0.18 ± 0.08    | $(3.0 \pm 0.5) \cdot 10^{-3}$ | 0.18 ± 0.21                   | $(3.0 \pm 0.5) \cdot 10^{-3}$ | 1.0             | 1.0     |
|                    |                  | A <sub>3.5</sub>         | 0.20 ± 0.08    | 0.10 ± 0.01                   | 0.09 ± 0.03                   | $(1.4 \pm 0.1) \cdot 10^{-3}$ | 0.03            | 0.001   |
|                    |                  | A <sub>4</sub>           | 0.37 ± 0.11    | 0.11 ± 0.004                  | 1.18 ± 0.29                   | $(7.4 \pm 1.2) \cdot 10^{-4}$ | 0.02            | < 0.001 |
|                    |                  | B <sub>3</sub>           | 0.22 ± 0.05    | $(8.5 \pm 0.5) \cdot 10^{-3}$ | 0.14 ± 0.03                   | 0.04 ± 0.003                  | 7.4             | 5.1     |
|                    |                  | B <sub>3.5</sub>         | 0.43 ± 0.21    | 0.022 ± 0.002                 | 0.20 ± 0.09                   | 0.029 ± 0.002                 | 2.8             | 2,27    |
|                    |                  | B <sub>4</sub>           | 0.44 ± 0.3     | 0.041 ± 0.02                  | 0.43 ± 0.34                   | 0.041 ± 0.007                 | 1.0             | 1.0     |
| N-A <sub>3.5</sub> | B <sub>3</sub>   | A <sub>3</sub>           | 0.06 ± 0.02    | $(6.8 \pm 1.1) \cdot 10^{-4}$ | 0.21 ± 0.11                   | 0.02 ± 0.004                  | 8.4             | 5.5     |
|                    |                  | A <sub>3.5</sub>         | 0.28 ± 0.09    | 0.036 ± 0.003                 | 0.28 ± 0.08                   | 0.037 ± 0.003                 | 1.03            | 1.0     |
|                    |                  | A <sub>4</sub>           | 0.46 ± 0.17    | 0.11 ± 0.006                  | 0.29 ± 0.11                   | $(9.5 \pm 0.5) \cdot 10^{-3}$ | 0.14            | 0.32    |
|                    |                  | B <sub>3</sub>           | 0.27 ± 0.09    | 0.017 ± 0.01                  | 0.26 ± 0.3                    | 0.017 ± 0.006                 | 1.04            | 1.0     |
|                    |                  | B <sub>3.5</sub>         | 0.16 ± 0.03    | 0.02 ± 0.0009                 | 0.99 ± 0.14                   | 0.01 ± 0.002                  | 0.08            | 0.008   |
|                    |                  | B <sub>4</sub>           | 0.25 ± 0.09    | 0.07 ± 0.004                  | 0.31 ± 0.1                    | $(4.1 \pm 0.3) \cdot 10^{-3}$ | 0.05            | 0.001   |
|                    | B <sub>3.5</sub> | A <sub>3</sub>           | 0.39 ± 0.24    | $(2.5 \pm 0.4) \cdot 10^{-3}$ | 0.11 ± 0.06                   | 0.03 ± 0.002                  | 42.5            | > 100   |
|                    |                  | A <sub>3.5</sub>         | 0.26 ± 0.05    | 0.028 ± 0.006                 | 0.31 ± 0.11                   | 0.03 ± 0.002                  | 0.90            | 1.0     |
|                    |                  | A <sub>4</sub>           | 0.36 ± 0.14    | 0.048 ± 0.003                 | 0.28 ± 0.09                   | 0.01 ± 0.0006                 | 0.30            | 0.14    |
|                    |                  | B <sub>3</sub>           | 0.36 ± 0.19    | 0.01 ± 0.003                  | 0.05 ± 0.02                   | 0.02 ± 0.0007                 | 14.4            | > 100   |
|                    |                  | B <sub>3.5</sub>         | 0.32 ± 0.07    | 0.037 ± 0.002                 | 0.33 ± 0.06                   | 0.04 ± 0.002                  | 1.0             | 1.0     |
|                    |                  | B <sub>4</sub>           | 0.44 ± 0.18    | 0.094 ± 0.007                 | 0.16 ± 0.06                   | 0.01 ± 0.0005                 | 0.35            | 0.16    |
|                    | B <sub>4</sub>   | A <sub>3</sub>           | 0.17 ± 0.05    | $(1.4 \pm 0.1) \cdot 10^{-3}$ | 0.38 ± 0.12                   | 0.09 ± 0.01                   | 28.8            | > 100   |
|                    |                  | A <sub>3.5</sub>         | 0.20 ± 0.11    | $(6.4 \pm 1.0) \cdot 10^{-3}$ | 0.20 ± 0.10                   | $(6.4 \pm 1.0) \cdot 10^{-3}$ | 1.0             | 1.0     |
|                    |                  | A <sub>4</sub>           | 0.19 ± 0.042   | 0.02 ± 0.0009                 | 0.50 ± 0.07                   | 0.01 ± 0.0009                 | 0.19            | 0.55    |
|                    |                  | B <sub>3</sub>           | 0.16 ± 0.09    | $(4.2 \pm 0.2) \cdot 10^{-3}$ | 0.14 ± 0.03                   | 0.07 ± 0.006                  | 19.0            | > 100   |
|                    |                  | B <sub>3.5</sub>         | 0.37 ± 0.06    | 0.011 ± 0.0005                | 0.91 ± 0.12                   | 0.09 ± 0.011                  | 3.5             | 6.4     |
|                    |                  | B <sub>4</sub>           | 0.28 ± 0.06    | 0.03 ± 0.001                  | 0.28 ± 0.05                   | 0.03 ± 0.001                  | 1.0             | 1.0     |
| N-A <sub>4</sub>   | B <sub>3</sub>   | A <sub>3</sub>           | 0.31 ± 0.18    | $(1.4 \pm 0.2) \cdot 10^{-3}$ | 0.34 ± 0.2                    | $(9.2 \pm 1.3) \cdot 10^{-2}$ | 6.0             | 5.1     |
|                    |                  | A <sub>3.5</sub>         | 0.39 ± 0.06    | $(6.7 \pm 0.4) \cdot 10^{-3}$ | 1.51 ± 0.3                    | 0.21 ± 0.05                   | 8.1             | 2.2     |
|                    |                  | A <sub>4</sub>           | 0.58 ± 0.13    | 0.02 ± 0.0007                 | 0.50 ± 0.10                   | 0.02 ± 0.0007                 | 1.10            | 1.0     |
|                    |                  | B <sub>3</sub>           | 0.14 ± 0.03    | 0.04 ± 0.01                   | 0.14 ± 0.12                   | 0.04 ± 0.007                  | 1.0             | 1.0     |
|                    |                  | B <sub>3.5</sub>         | 0.22 ± 0.04    | 0.12 ± 0.004                  | 0.51 ± 0.09                   | $(5.7 \pm 0.6) \cdot 10^{-4}$ | 0.002           | 0.004   |
|                    |                  | B <sub>4</sub>           | 0.20 ± 0.04    | 0.096 ± 0.003                 | 0.84 ± 0.13                   | $(1.5 \pm 0.2) \cdot 10^{-3}$ | 0.004           | 0.002   |
|                    | B <sub>3.5</sub> | A <sub>3</sub>           | 0.29 ± 0.1     | $(4.1 \pm 0.4) \cdot 10^{-3}$ | 0.07 ± 0.02                   | 0.06 ± 0.003                  | 60.6            | > 100   |
|                    |                  | A <sub>3.5</sub>         | 0.24 ± 0.07    | 0.01 ± 0.0009                 | 0.21 ± 0.05                   | 0.03 ± 0.002                  | 3.4             | 6.9     |
|                    |                  | A <sub>4</sub>           | 0.20 ± 0.05    | 0.026 ± 0.002                 | 0.20 ± 0.04                   | 0.025 ± 0.002                 | 0.96            | 1.0     |
|                    |                  | B <sub>3</sub>           | 0.19 ± 0.03    | $(9.9 \pm 0.9) \cdot 10^{-4}$ | 0.03 ± 0.007                  | 0.11 ± 0.003                  | > 100           | > 100   |
|                    |                  | B <sub>3.5</sub>         | 0.22 ± 0.05    | 0.03 ± 0.002                  | 0.24 ± 0.04                   | 0.04 ± 0.002                  | 1.22            | 1.0     |
|                    |                  | B <sub>4</sub>           | 0.27 ± 0.08    | 0.09 ± 0.006                  | 0.09 ± 0.02                   | 0.01 ± 0.0005                 | 0.33            | 0.62    |
|                    | B <sub>4</sub>   | A <sub>3</sub>           | 0.34 ± 0.13    | $(8.1 \pm 0.9) \cdot 10^{-4}$ | 0.14 ± 0.05                   | 0.13 ± 0.008                  | > 100           | > 100   |
|                    |                  | A <sub>3.5</sub>         | 0.17 ± 0.04    | 0.01 ± 0.0009                 | 0.07 ± 0.01                   | 0.02 ± 0.001                  | 4.9             | 1.7     |
|                    |                  | A <sub>4</sub>           | 0.11 ± 0.24    | 0.013 ± 0.04                  | 0.11 ± 0.30                   | 0.013 ± 0.04                  | 1.0             | 1.0     |
|                    |                  | B <sub>3</sub>           | 0.25 ± 0.06    | $(1.2 \pm 0.1) \cdot 10^{-3}$ | 0.07 ± 0.02                   | 0.11 ± 0.005                  | > 100           | > 100   |
|                    |                  | B <sub>3.5</sub>         | 0.17 ± 0.02    | 0.01 ± 0.0004                 | 0.38 ± 0.03                   | 0.07 ± 0.006                  | 3.1             | 1.6     |
|                    |                  | B <sub>4</sub>           | 0.32 ± 0.08    | 0.013 ± 0.0006                | 0.32 ± 0.06                   | 0.013 ± 0.0006                | 1.0             | 1.0     |



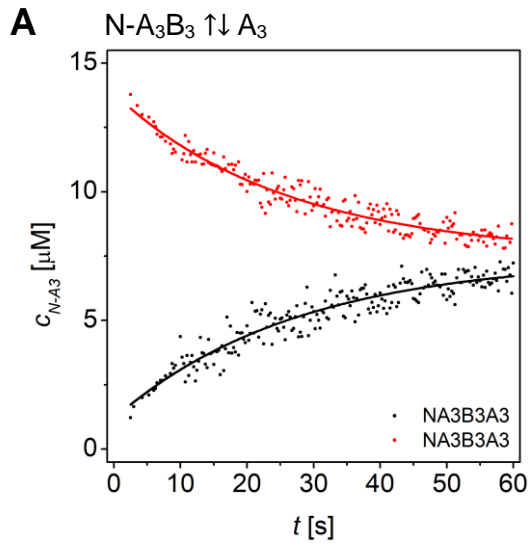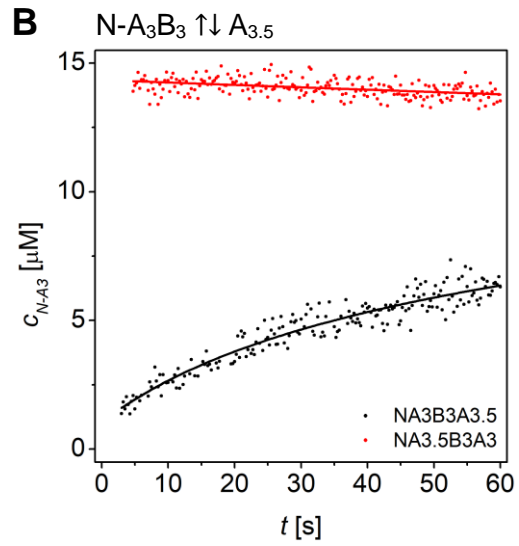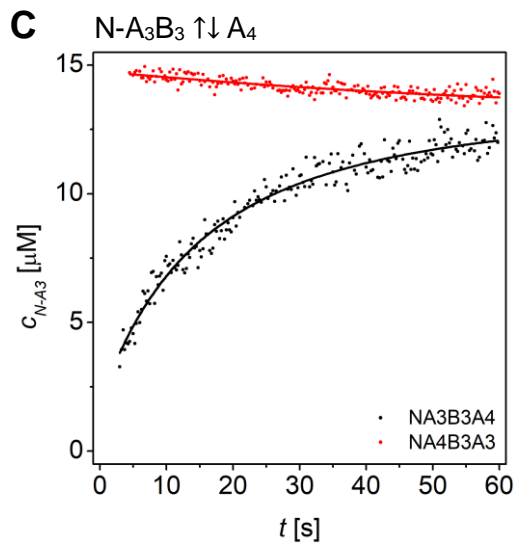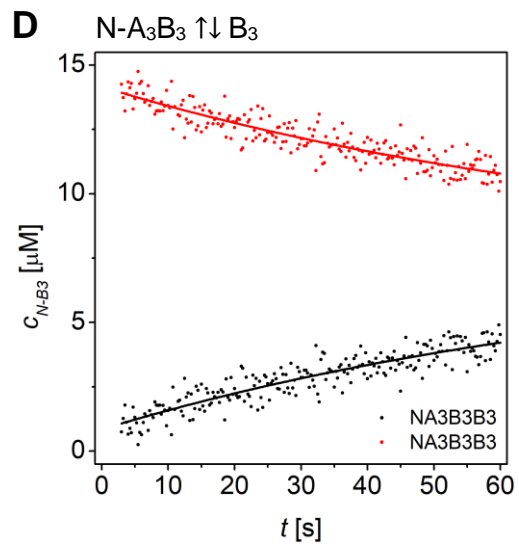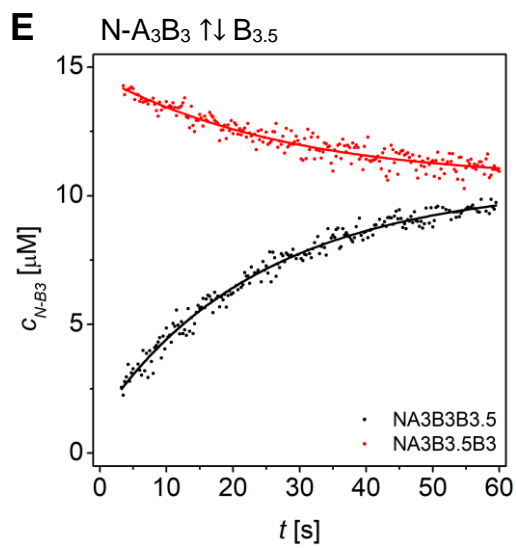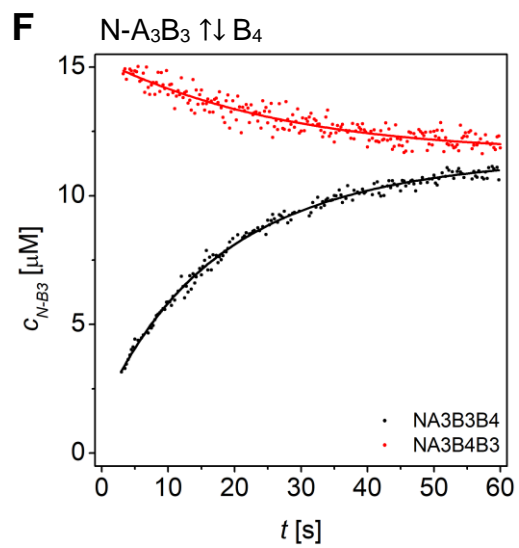

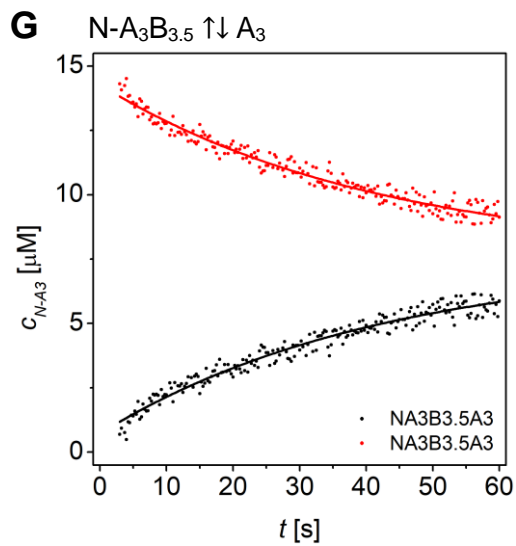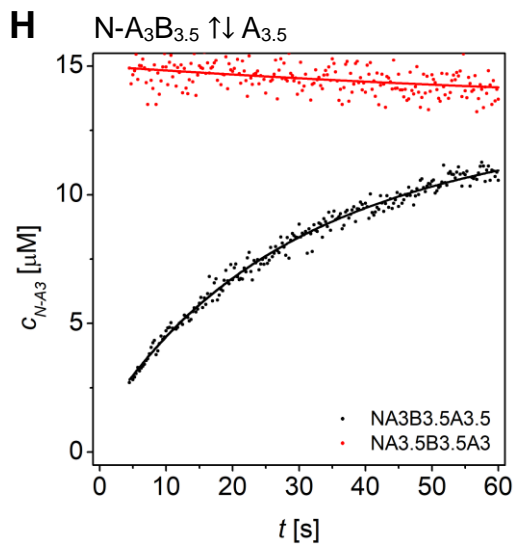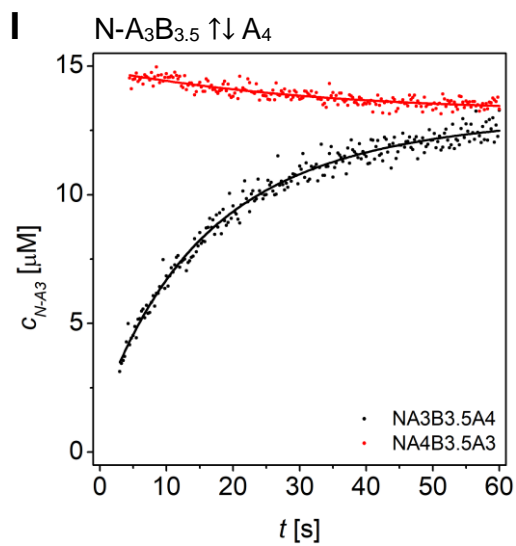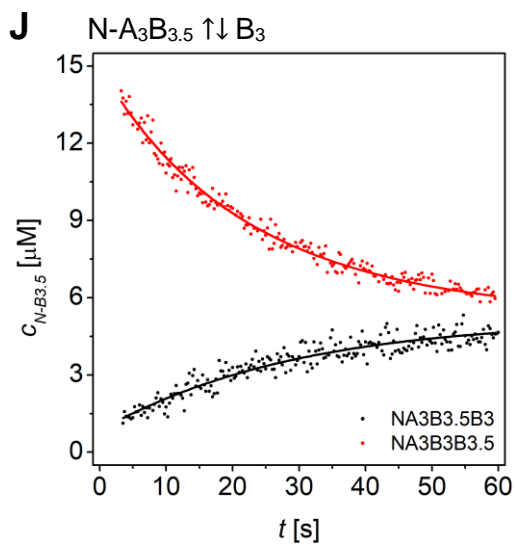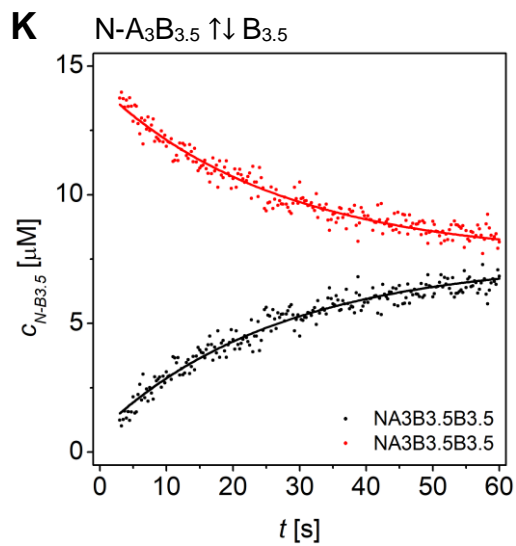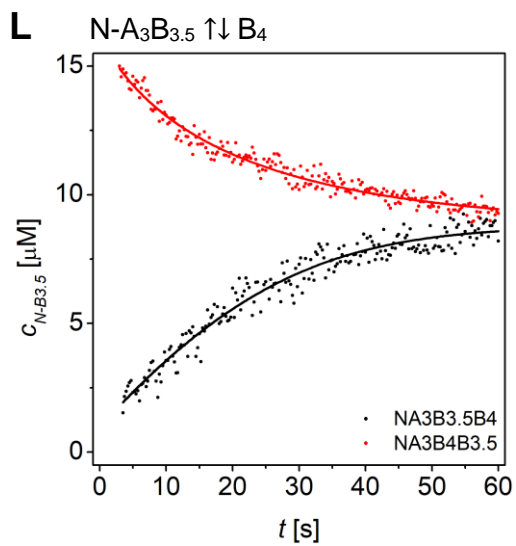

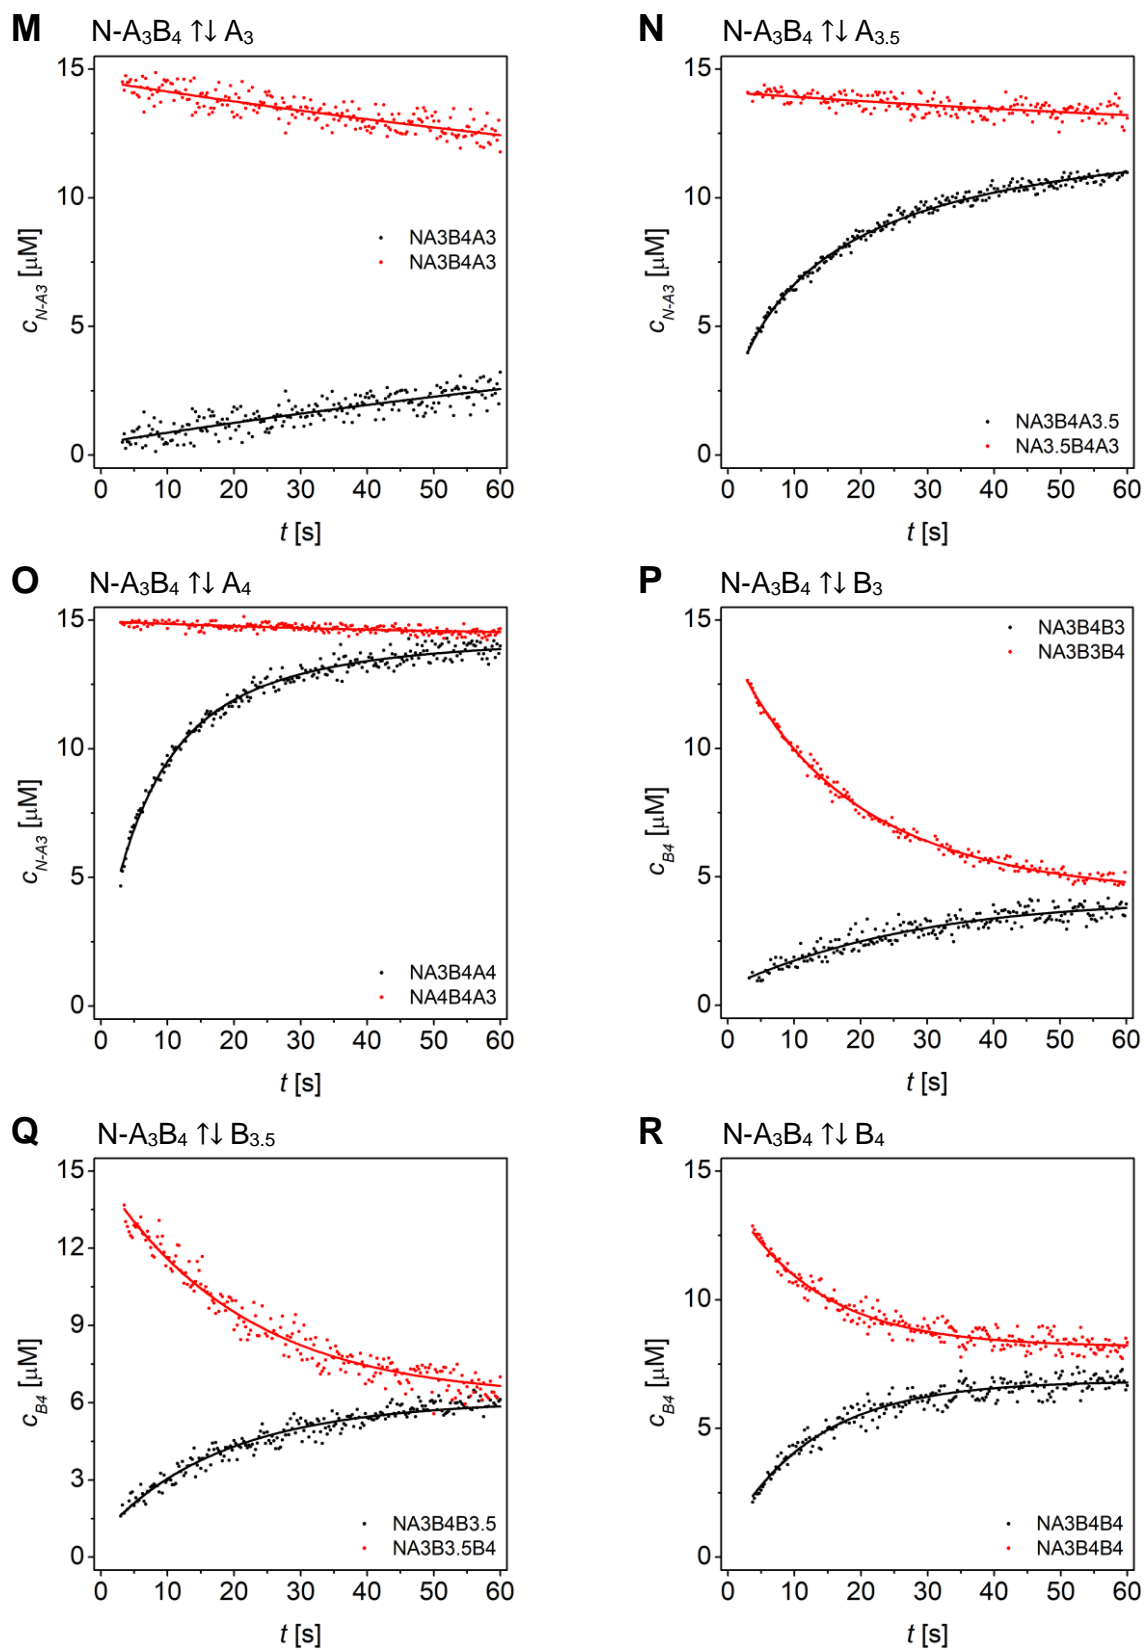

**Figure S8.** Dynafit results of least-squares fits of strand displacement in N-A<sub>3</sub>B peptides using a competitive binding model.

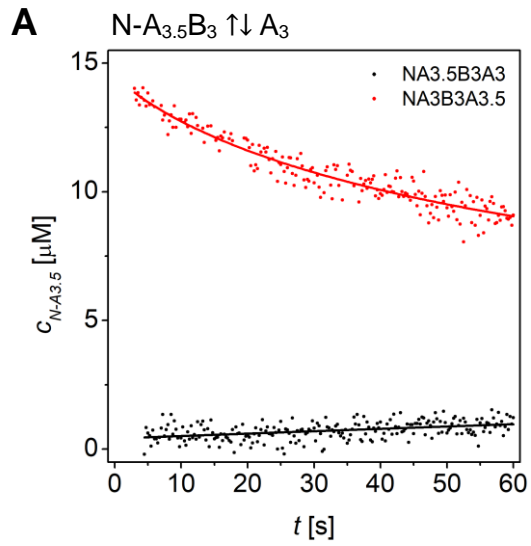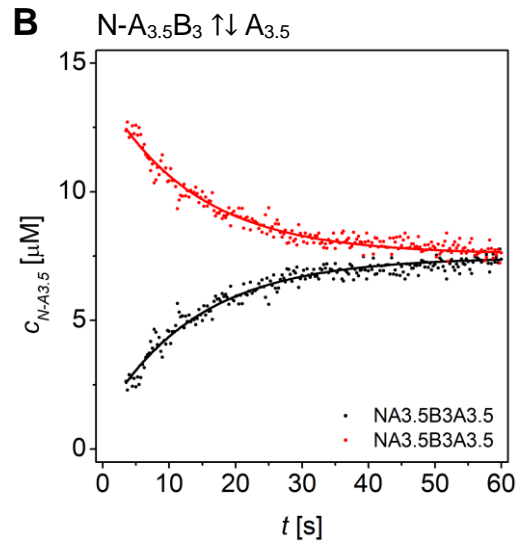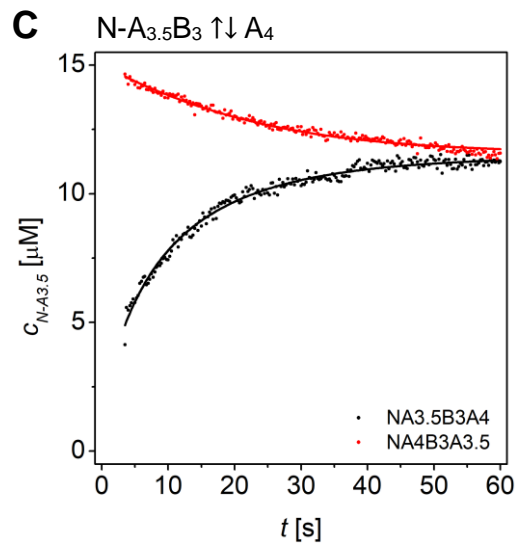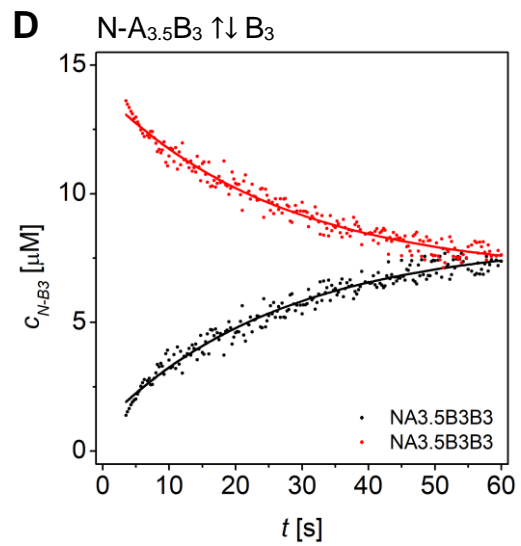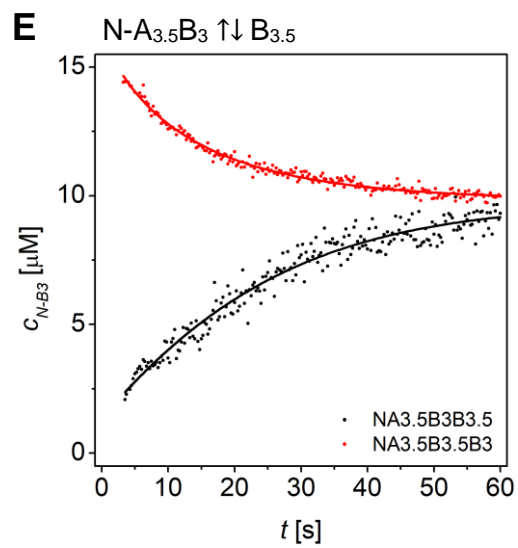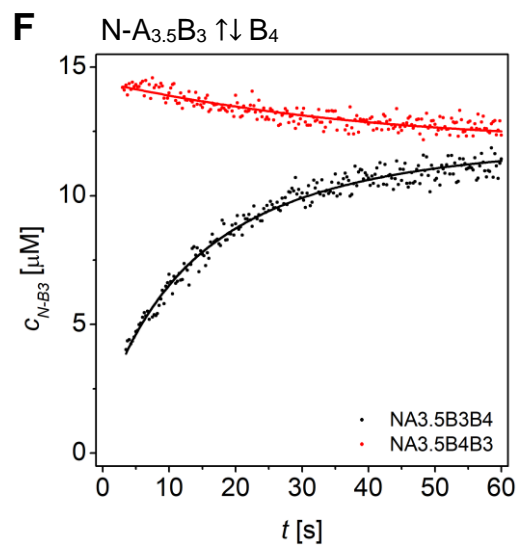

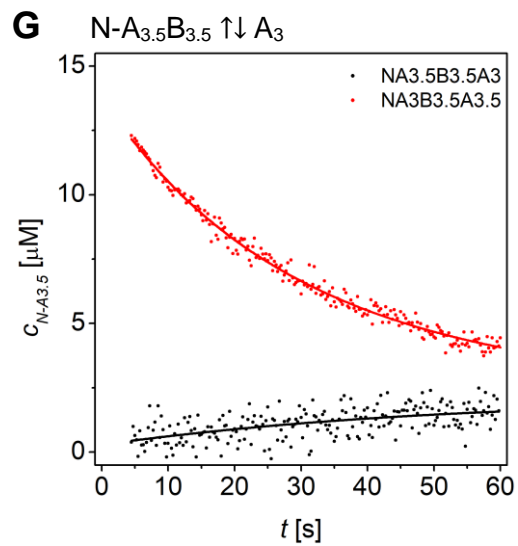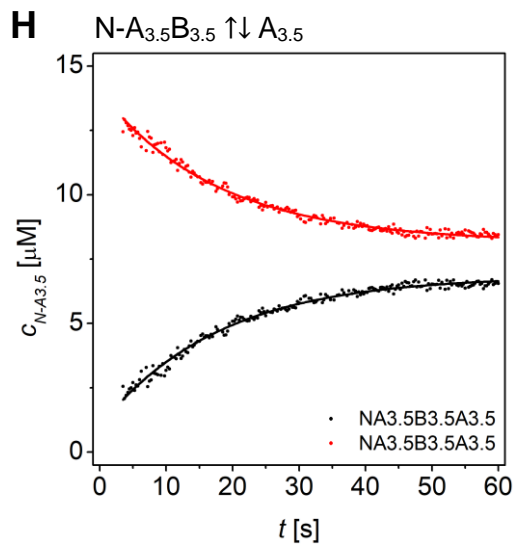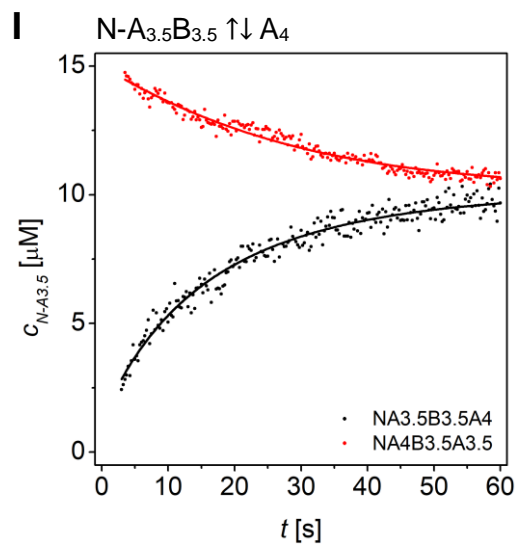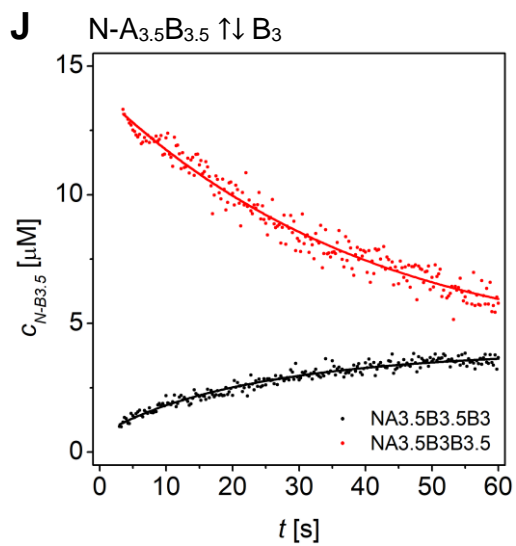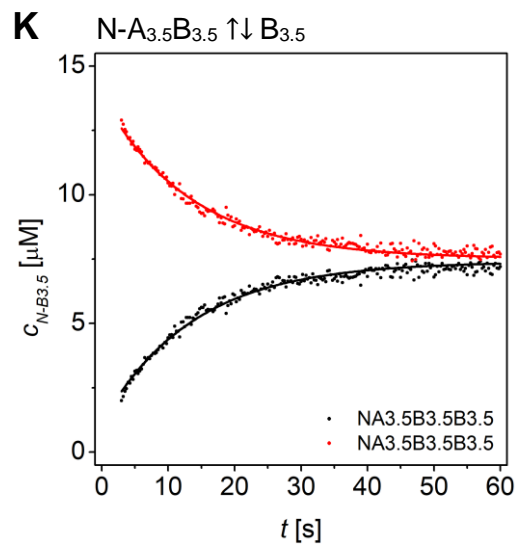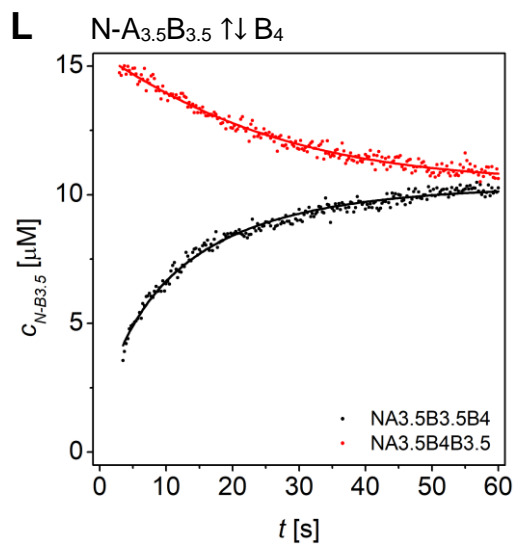

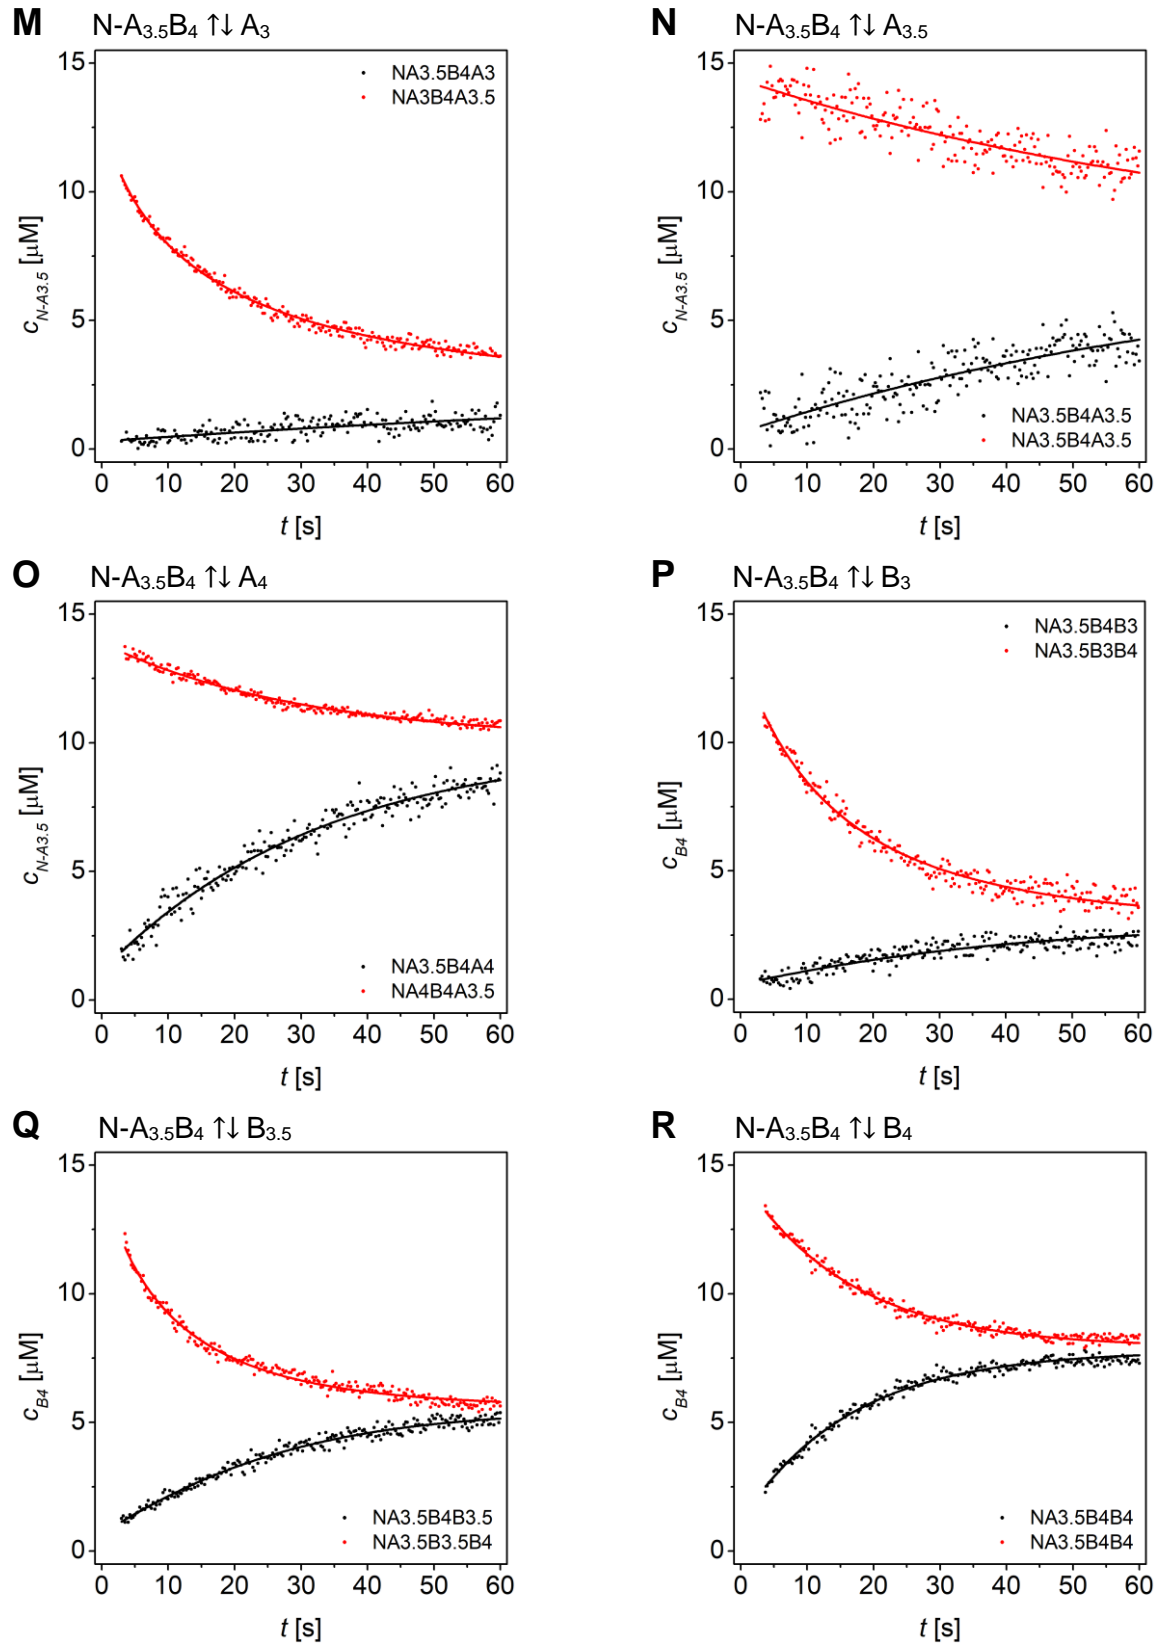

**Figure S9.** Dynafit results of least-squares fits strand displacement in N-A<sub>3.5</sub>B peptides using a competitive binding model.

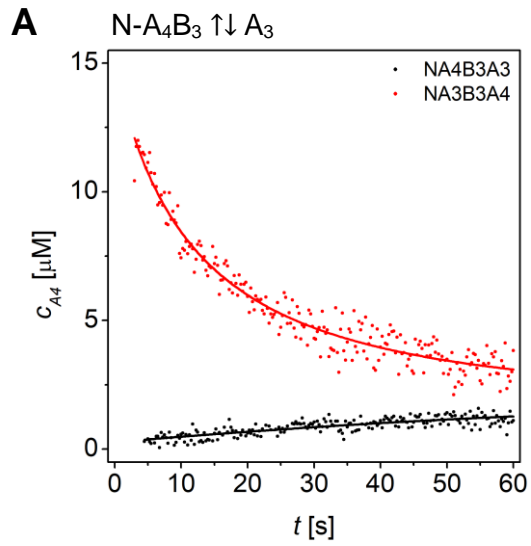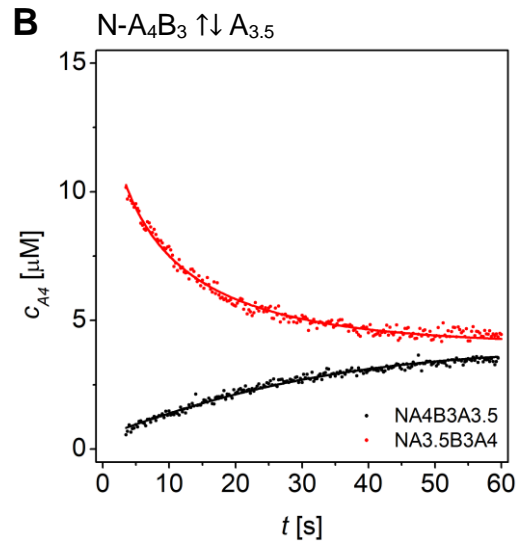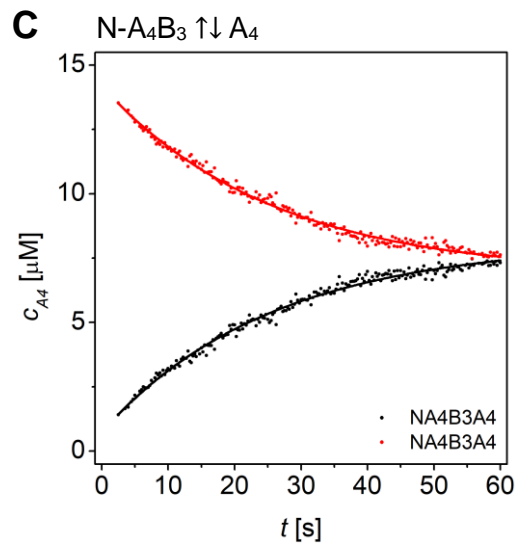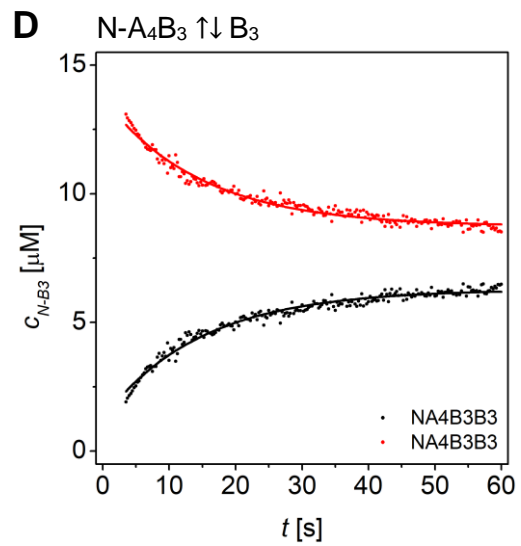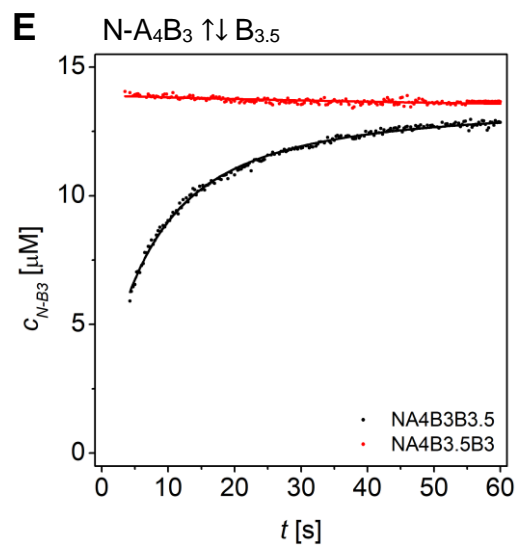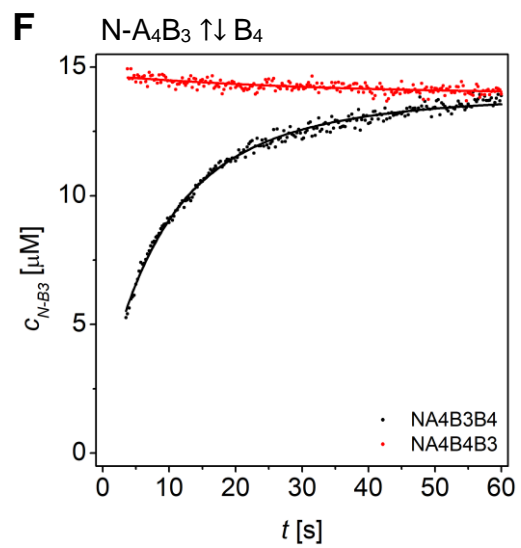

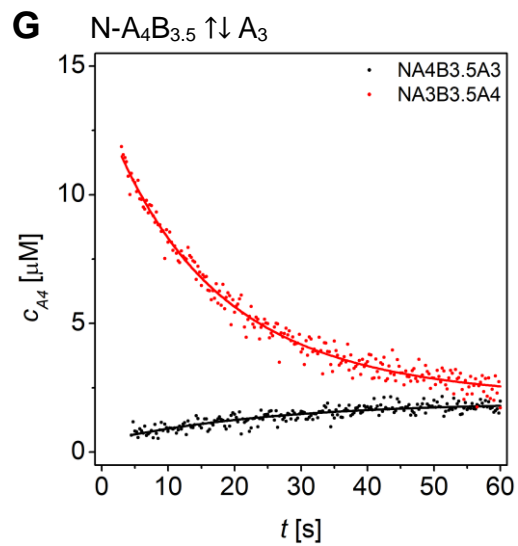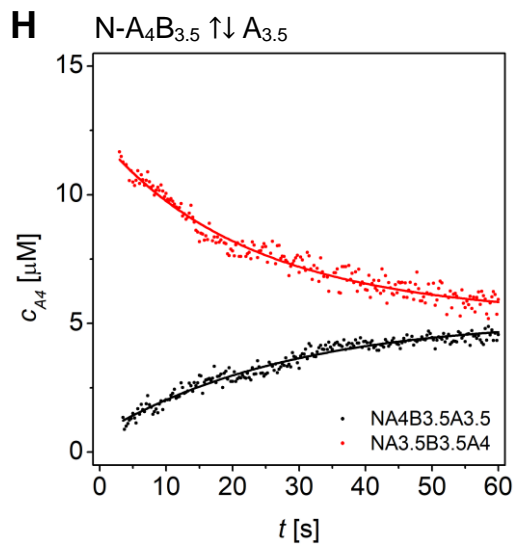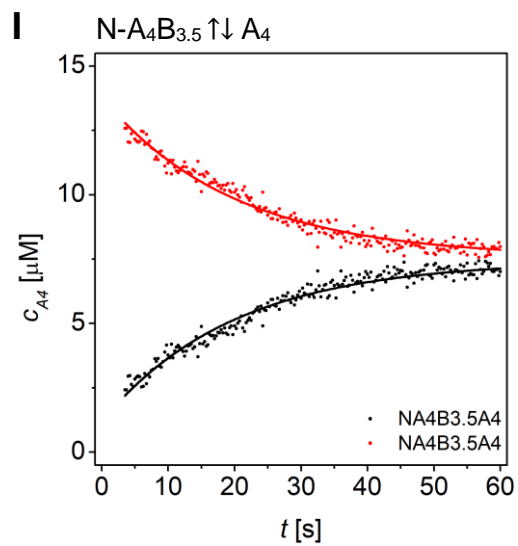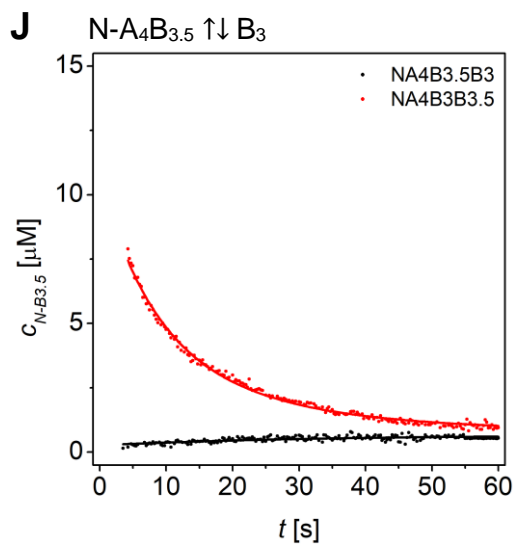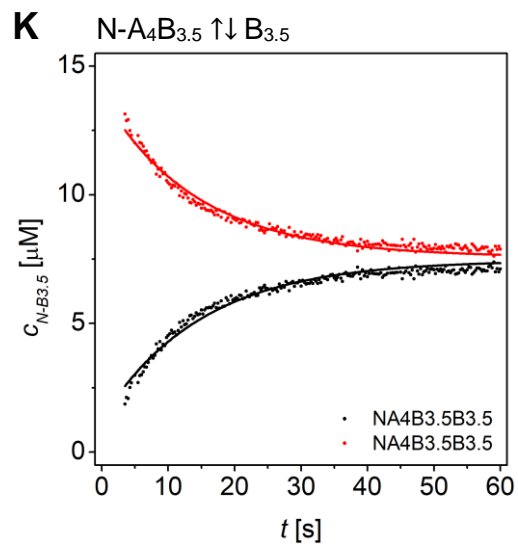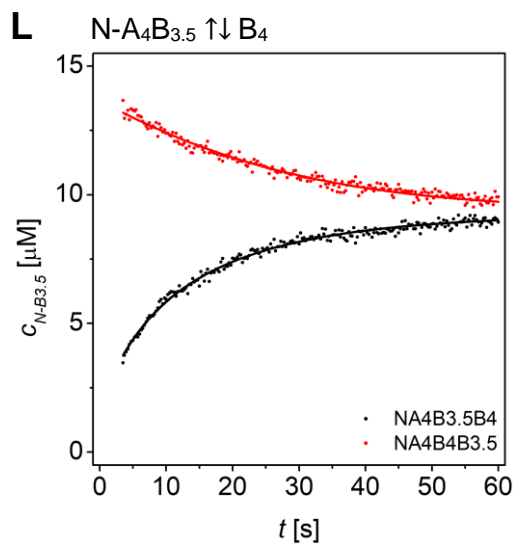



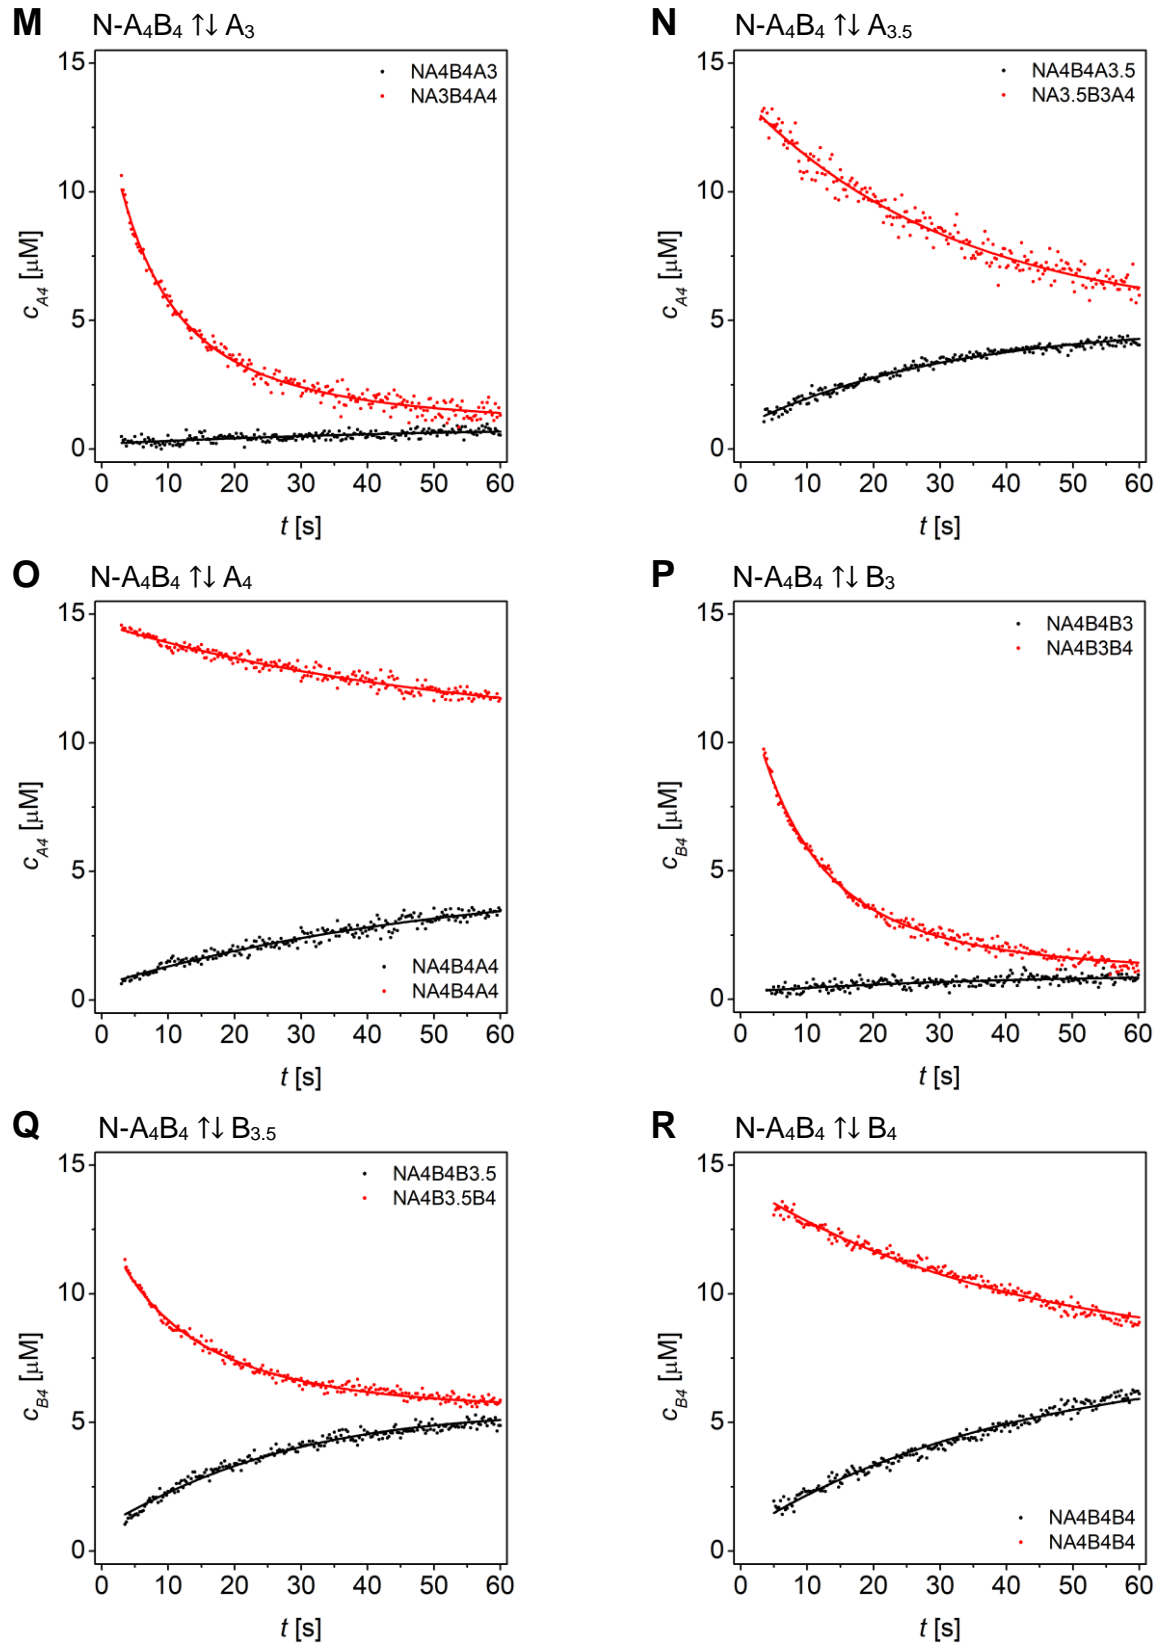

**Figure S10.** Dynafit results of least-squares fits strand displacement in N-A<sub>4</sub>B peptides using a competitive binding model.

**Table S8.** Best-fit values of rate constants of competitive strand displacement in C-A<sub>x</sub>B<sub>y</sub> peptides obtained from DynaFit analysis. Ratio of overall affinities ( $k_1k_4/k_2k_3$ ) matches well with the ration of the  $K_D$  values determined from CD-thermal denaturation curves. P<sub>comp</sub> is the general term for peptide competitor (A<sub>comp</sub> or B<sub>comp</sub>).

| AB peptide         | P <sub>comp</sub> | $k_1$ [ $\mu\text{M}^{-1}\text{s}^{-1}$ ] | $k_2$ [ $\text{s}^{-1}$ ] | $k_3$ [ $\mu\text{M}^{-1}\text{s}^{-1}$ ] | $k_4$ [ $\text{s}^{-1}$ ]     | $k_1k_4/k_2k_3$               | $K_D(\text{comp})/K_D$ |         |
|--------------------|-------------------|-------------------------------------------|---------------------------|-------------------------------------------|-------------------------------|-------------------------------|------------------------|---------|
| C-A <sub>3</sub>   | B <sub>3</sub>    | A <sub>3</sub>                            | 0.15 ± 0.02               | 0.01 ± 0.0006                             | 0.15 ± 0.02                   | 0.01 ± 0.0006                 | 1.0                    | 1.0     |
|                    |                   | A <sub>3.5</sub>                          | 0.15 ± 0.02               | 0.04 ± 0.002                              | 0.17 ± 0.02                   | 0.01 ± 0.0004                 | 0.22                   | 0.57    |
|                    |                   | A <sub>4</sub>                            | 0.23 ± 0.07               | 0.03 ± 0.002                              | 0.17 ± 0.04                   | 0.01 ± 0.0006                 | 0.45                   | 0.63    |
|                    |                   | B <sub>3</sub>                            | 0.13 ± 0.04               | 0.035 ± 0.02                              | 0.13 ± 0.2                    | 0.035 ± 0.01                  | 1.0                    | 1.0     |
|                    |                   | B <sub>3.5</sub>                          | 0.21 ± 0.06               | 0.07 ± 0.007                              | 0.06 ± 0.01                   | $(8.9 \pm 0.4) \cdot 10^{-3}$ | 0.45                   | 0.31    |
|                    |                   | B <sub>4</sub>                            | 0.21 ± 0.06               | 0.18 ± 0.02                               | 0.06 ± 0.02                   | $(6.8 \pm 0.5) \cdot 10^{-3}$ | 0.13                   | 0.18    |
|                    | B <sub>3.5</sub>  | A <sub>3</sub>                            | 0.31 ± 0.06               | 0.021 ± 0.0009                            | 0.25 ± 0.04                   | 0.018 ± 0.0007                | 1.06                   | 1.0     |
|                    |                   | A <sub>3.5</sub>                          | 0.13 ± 0.03               | 0.06 ± 0.003                              | 0.17 ± 0.03                   | $(2.1 \pm 0.2) \cdot 10^{-3}$ | 0.03                   | 0.06    |
|                    |                   | A <sub>4</sub>                            | 0.25 ± 0.03               | 0.047 ± 0.0007                            | 4.9 ± 0.57                    | $(1.7 \pm 0.9) \cdot 10^{-4}$ | < 0.001                | 0.04    |
|                    |                   | B <sub>3</sub>                            | 0.20 ± 0.03               | $(8.9 \pm 0.3) \cdot 10^{-3}$             | 0.55 ± 0.08                   | 0.05 ± 0.006                  | 2.0                    | 3.3     |
|                    |                   | B <sub>3.5</sub>                          | 0.17 ± 0.09               | 0.06 ± 0.04                               | 0.17 ± 0.23                   | 0.06 ± 0.01                   | 1.0                    | 1.0     |
|                    |                   | B <sub>4</sub>                            | 0.12 ± 0.02               | 0.02 ± 0.0006                             | 0.59 ± 0.08                   | 0.04 ± 0.006                  | 0.41                   | 0.57    |
|                    | B <sub>4</sub>    | A <sub>3</sub>                            | 0.24 ± 0.04               | 0.02 ± 0.0006                             | 0.24 ± 0.03                   | 0.02 ± 0.0006                 | 1.0                    | 1.0     |
|                    |                   | A <sub>3.5</sub>                          | 0.11 ± 0.01               | 0.04 ± 0.001                              | 0.29 ± 0.02                   | $(1.6 \pm 0.1) \cdot 10^{-3}$ | 0.02                   | 0.008   |
|                    |                   | A <sub>4</sub>                            | 0.12 ± 0.02               | 0.04 ± 0.001                              | 0.15 ± 0.01                   | $(9.4 \pm 5.1) \cdot 10^{-5}$ | 0.002                  | < 0.001 |
|                    |                   | B <sub>3</sub>                            | 0.12 ± 0.01               | $(6.6 \pm 0.3) \cdot 10^{-3}$             | 0.30 ± 0.05                   | 0.14 ± 0.03                   | 8.5                    | 5.7     |
|                    |                   | B <sub>3.5</sub>                          | 0.28 ± 0.11               | 0.03 ± 0.003                              | 0.07 ± 0.02                   | 0.02 ± 0.0007                 | 2.7                    | 1.7     |
|                    |                   | B <sub>4</sub>                            | 0.15 ± 0.02               | 0.02 ± 0.007                              | 0.15 ± 0.12                   | 0.02 ± 0.005                  | 1.0                    | 1.0     |
| C-A <sub>3.5</sub> | B <sub>3</sub>    | A <sub>3</sub>                            | 0.15 ± 0.02               | 0.01 ± 0.0004                             | 0.12 ± 0.01                   | 0.04 ± 0.002                  | 5.0                    | 1.8     |
|                    |                   | A <sub>3.5</sub>                          | 0.33 ± 0.05               | 0.02 ± 0.0007                             | 0.33 ± 0.04                   | 0.02 ± 0.0007                 | 1.0                    | 1.0     |
|                    |                   | A <sub>4</sub>                            | 0.29 ± 0.03               | 0.02 ± 0.0004                             | 0.66 ± 0.05                   | 0.03 ± 0.001                  | 0.66                   | 1.1     |
|                    |                   | B <sub>3</sub>                            | 0.35 ± 0.14               | 0.03 ± 0.018                              | 0.35 ± 0.52                   | 0.03 ± 0.01                   | 1.0                    | 1.0     |
|                    |                   | B <sub>3.5</sub>                          | 0.13 ± 0.03               | 0.19 ± 0.03                               | 0.03 ± 0.003                  | $(5.2 \pm 0.2) \cdot 10^{-3}$ | 0.11                   | 0.03    |
|                    |                   | B <sub>4</sub>                            | 0.45 ± 0.25               | 0.02 ± 0.002                              | 0.19 ± 0.06                   | $(9.9 \pm 4.2) \cdot 10^{-5}$ | 0.01                   | 0.003   |
|                    | B <sub>3.5</sub>  | A <sub>3</sub>                            | 0.21 ± 0.06               | $(1.7 \pm 0.1) \cdot 10^{-3}$             | 0.24 ± 0.06                   | 0.07 ± 0.005                  | 36                     | 18      |
|                    |                   | A <sub>3.5</sub>                          | 0.21 ± 0.04               | 0.02 ± 0.006                              | 0.21 ± 0.17                   | 0.02 ± 0.004                  | 1.0                    | 1.0     |
|                    |                   | A <sub>4</sub>                            | 0.24 ± 0.03               | 0.03 ± 0.0007                             | 0.40 ± 0.03                   | 0.02 ± 0.0007                 | 0.4                    | 0.58    |
|                    |                   | B <sub>3</sub>                            | 0.26 ± 0.04               | $(5.2 \pm 0.2) \cdot 10^{-3}$             | 0.36 ± 0.05                   | 0.07 ± 0.005                  | 9.7                    | 31      |
|                    |                   | B <sub>3.5</sub>                          | 0.21 ± 0.06               | 0.05 ± 0.02                               | 0.21 ± 0.13                   | 0.05 ± 0.005                  | 1.0                    | 1.0     |
|                    |                   | B <sub>4</sub>                            | 0.16 ± 0.04               | 0.18 ± 0.02                               | 0.05 ± 0.008                  | $(1.8 \pm 0.1) \cdot 10^{-3}$ | 0.03                   | 0.10    |
|                    | B <sub>4</sub>    | A <sub>3</sub>                            | 0.14 ± 0.03               | $(1.4 \pm 0.09) \cdot 10^{-3}$            | 0.08 ± 0.02                   | 0.04 ± 0.002                  | 50                     | >100    |
|                    |                   | A <sub>3.5</sub>                          | 0.20 ± 0.03               | 0.01 ± 0.0004                             | 0.20 ± 0.02                   | 0.01 ± 0.0004                 | 1.0                    | 1.0     |
|                    |                   | A <sub>4</sub>                            | 0.18 ± 0.02               | 0.01 ± 0.002                              | 0.92 ± 0.23                   | 0.002 ± 0.0005                | 0.04                   | 0.08    |
|                    |                   | B <sub>3</sub>                            | 0.15 ± 0.05               | $(5.5 \pm 0.7) \cdot 10^{-4}$             | 0.05 ± 0.02                   | 0.02 ± 0.0007                 | >100                   | >100    |
|                    |                   | B <sub>3.5</sub>                          | 0.14 ± 0.03               | $(1.8 \pm 0.1) \cdot 10^{-3}$             | 0.27 ± 0.06                   | 0.16 ± 0.03                   | 46                     | 12      |
|                    |                   | B <sub>4</sub>                            | 0.19 ± 0.03               | 0.03 ± 0.001                              | 0.19 ± 0.02                   | 0.03 ± 0.001                  | 1.0                    | 1.0     |
| C-A <sub>4</sub>   | B <sub>3</sub>    | A <sub>3</sub>                            | 0.21 ± 0.04               | 0.01 ± 0.0006                             | 0.25 ± 0.04                   | 0.03 ± 0.002                  | 2.5                    | 1.6     |
|                    |                   | A <sub>3.5</sub>                          | 0.31 ± 0.05               | 0.03 ± 0.001                              | 0.13 ± 0.02                   | 0.02 ± 0.0004                 | 1.59                   | 0.9     |
|                    |                   | A <sub>4</sub>                            | 0.24 ± 0.02               | 0.016 ± 0.0004                            | 0.21 ± 0.02                   | 0.014 ± 0.0004                | 1.0                    | 1.0     |
|                    |                   | B <sub>3</sub>                            | 0.16 ± 0.39               | 0.02 ± 0.07                               | 0.17 ± 4.2                    | 0.02 ± 0.08                   | 1.0                    | 1.0     |
|                    |                   | B <sub>3.5</sub>                          | 0.11 ± 0.07               | 0.46 ± 0.26                               | 0.012 ± 0.0009                | $(5.1 \pm 0.3) \cdot 10^{-3}$ | 0.10                   | 0.02    |
|                    |                   | B <sub>4</sub>                            | 0.20 ± 0.09               | 0.63 ± 0.21                               | 0.03 ± 0.004                  | $(1.3 \pm 0.1) \cdot 10^{-3}$ | 0.01                   | < 0.001 |
|                    | B <sub>3.5</sub>  | A <sub>3</sub>                            | 0.24 ± 0.06               | $(7.1 \pm 0.7) \cdot 10^{-4}$             | $(1.6 \pm 0.5) \cdot 10^{-3}$ | 0.05 ± 0.0006                 | >100                   | 27      |
|                    |                   | A <sub>3.5</sub>                          | 0.23 ± 0.03               | 0.01 ± 0.0004                             | 0.17 ± 0.02                   | 0.03 ± 0.0009                 | 4.1                    | 1.6     |
|                    |                   | A <sub>4</sub>                            | 0.29 ± 0.03               | 0.02 ± 0.0006                             | 0.29 ± 0.03                   | 0.02 ± 0.0006                 | 1.0                    | 1.0     |
|                    |                   | B <sub>3</sub>                            | 0.25 ± 0.05               | $(3.3 \pm 0.1) \cdot 10^{-3}$             | 0.27 ± 0.05                   | 0.06 ± 0.003                  | 17                     | 56      |
|                    |                   | B <sub>3.5</sub>                          | 0.25 ± 0.05               | 0.031 ± 0.002                             | 0.20 ± 0.03                   | 0.025 ± 0.001                 | 1.0                    | 1.0     |
|                    |                   | B <sub>4</sub>                            | 0.22 ± 0.07               | 0.45 ± 0.08                               | 0.05 ± 0.009                  | $(9.1 \pm 0.9) \cdot 10^{-4}$ | 0.009                  | 0.01    |
|                    | B <sub>4</sub>    | A <sub>3</sub>                            | 0.16 ± 0.04               | $(9.9 \pm 0.7) \cdot 10^{-4}$             | 0.13 ± 0.03                   | 0.03 ± 0.001                  | 37                     | >100    |
|                    |                   | A <sub>3.5</sub>                          | 0.15 ± 0.04               | $(1.9 \pm 0.5) \cdot 10^{-3}$             | 0.01 ± 0.001                  | 0.01 ± 0.0008                 | 79                     | 13      |
|                    |                   | A <sub>4</sub>                            | 0.11 ± 0.24               | 0.013 ± 0.04                              | 0.11 ± 0.30                   | 0.013 ± 0.04                  | 1.0                    | 1.0     |
|                    |                   | B <sub>3</sub>                            | 0.05 ± 0.009              | $(1.1 \pm 0.06) \cdot 10^{-3}$            | 0.14 ± 0.03                   | 0.21 ± 0.05                   | 68                     | >100    |
|                    |                   | B <sub>3.5</sub>                          | 0.20 ± 0.06               | $(9.2 \pm 0.8) \cdot 10^{-4}$             | 0.20 ± 0.06                   | 0.13 ± 0.01                   | >100                   | 97      |
|                    |                   | B <sub>4</sub>                            | 0.32 ± 0.08               | 0.013 ± 0.0006                            | 0.32 ± 0.06                   | 0.013 ± 0.0006                | 1.0                    | 1.0     |

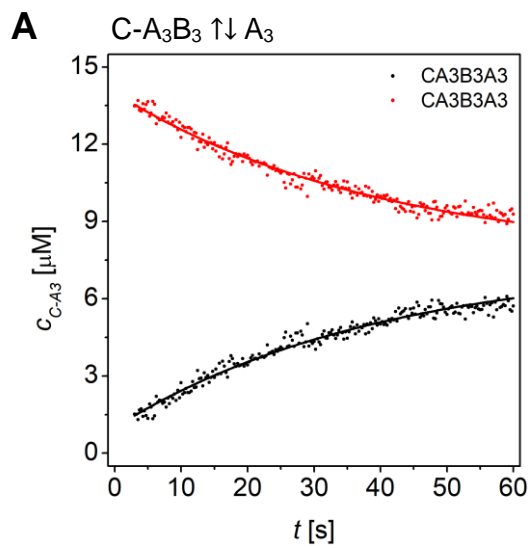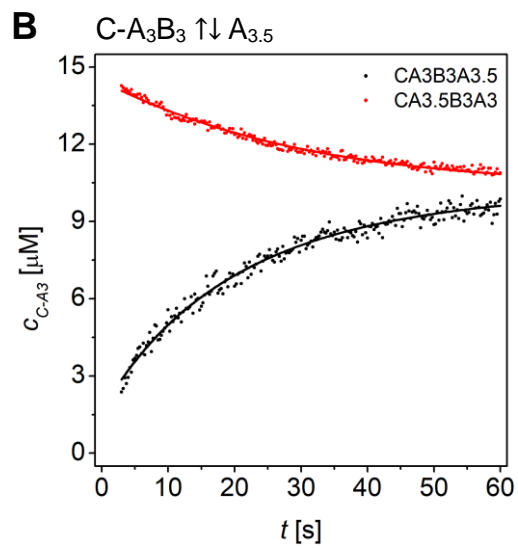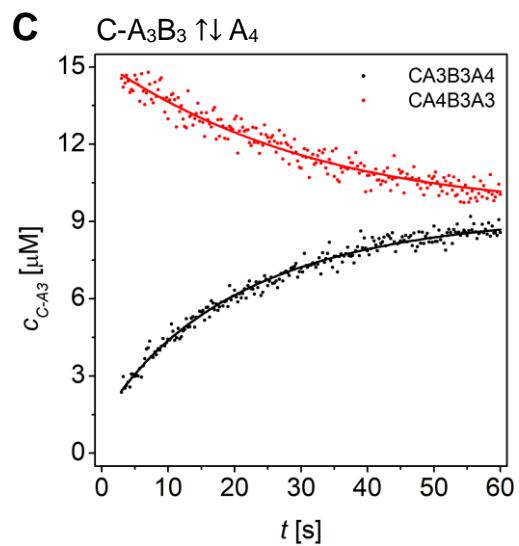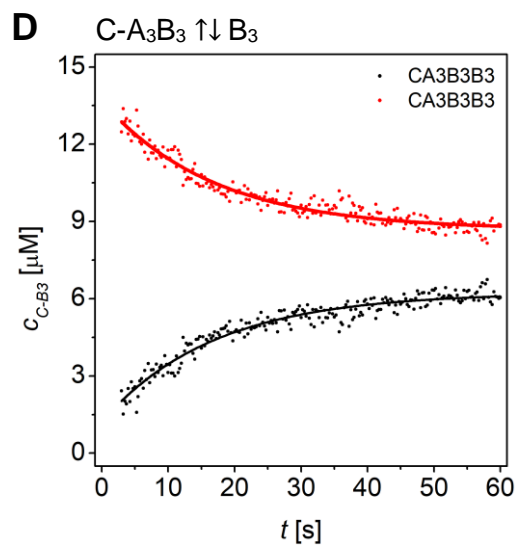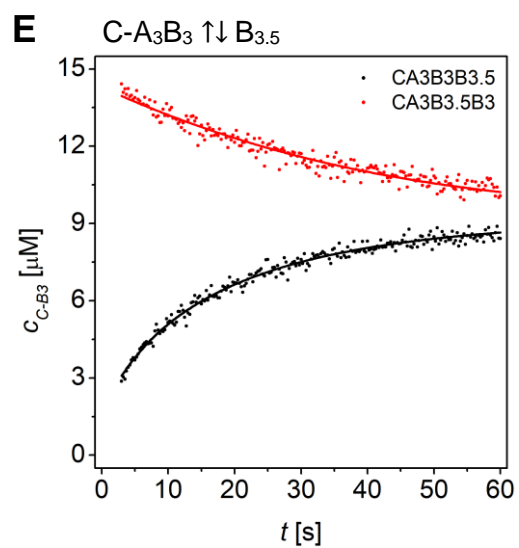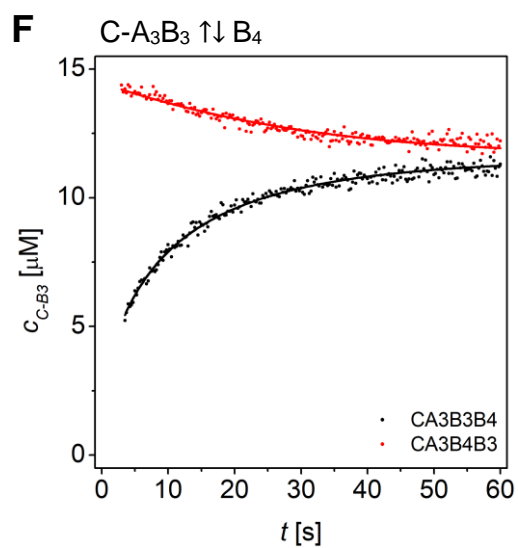

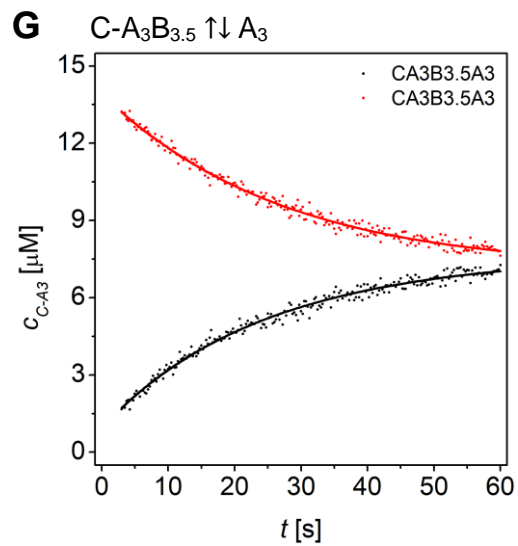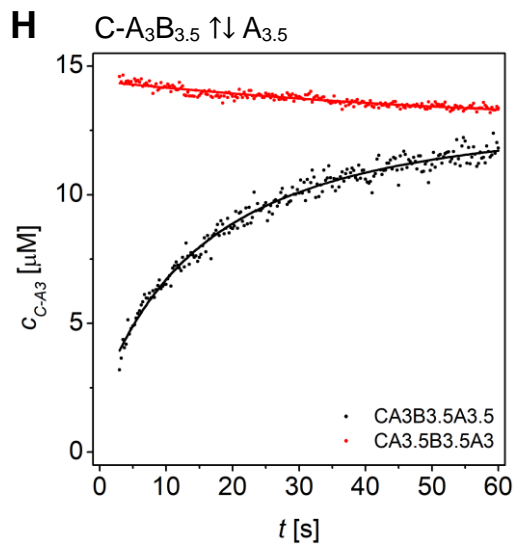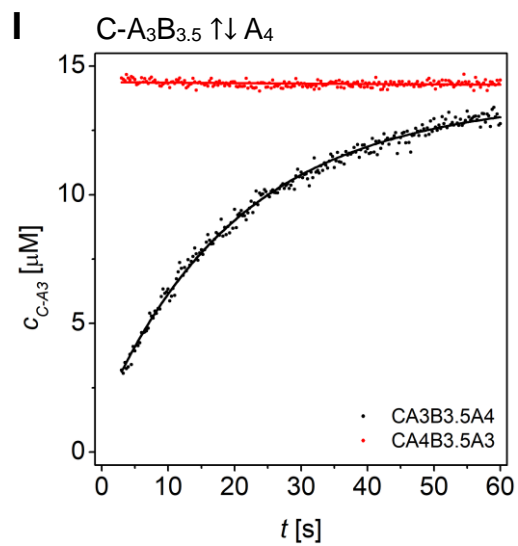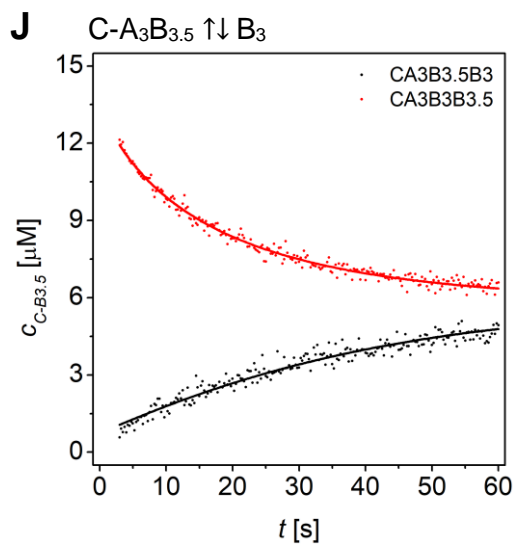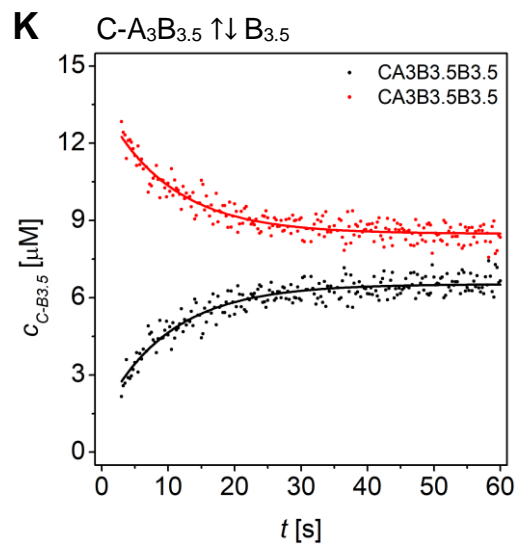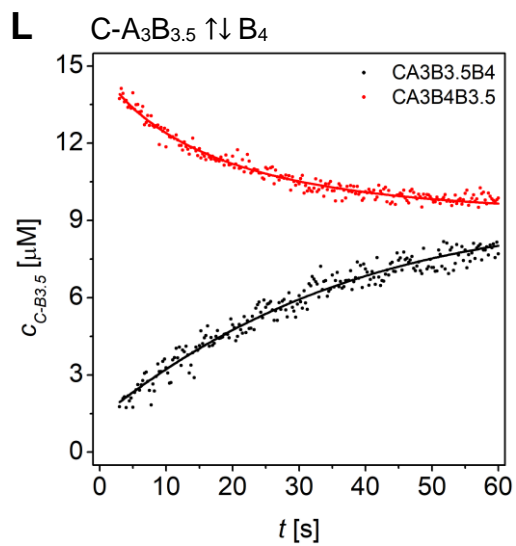

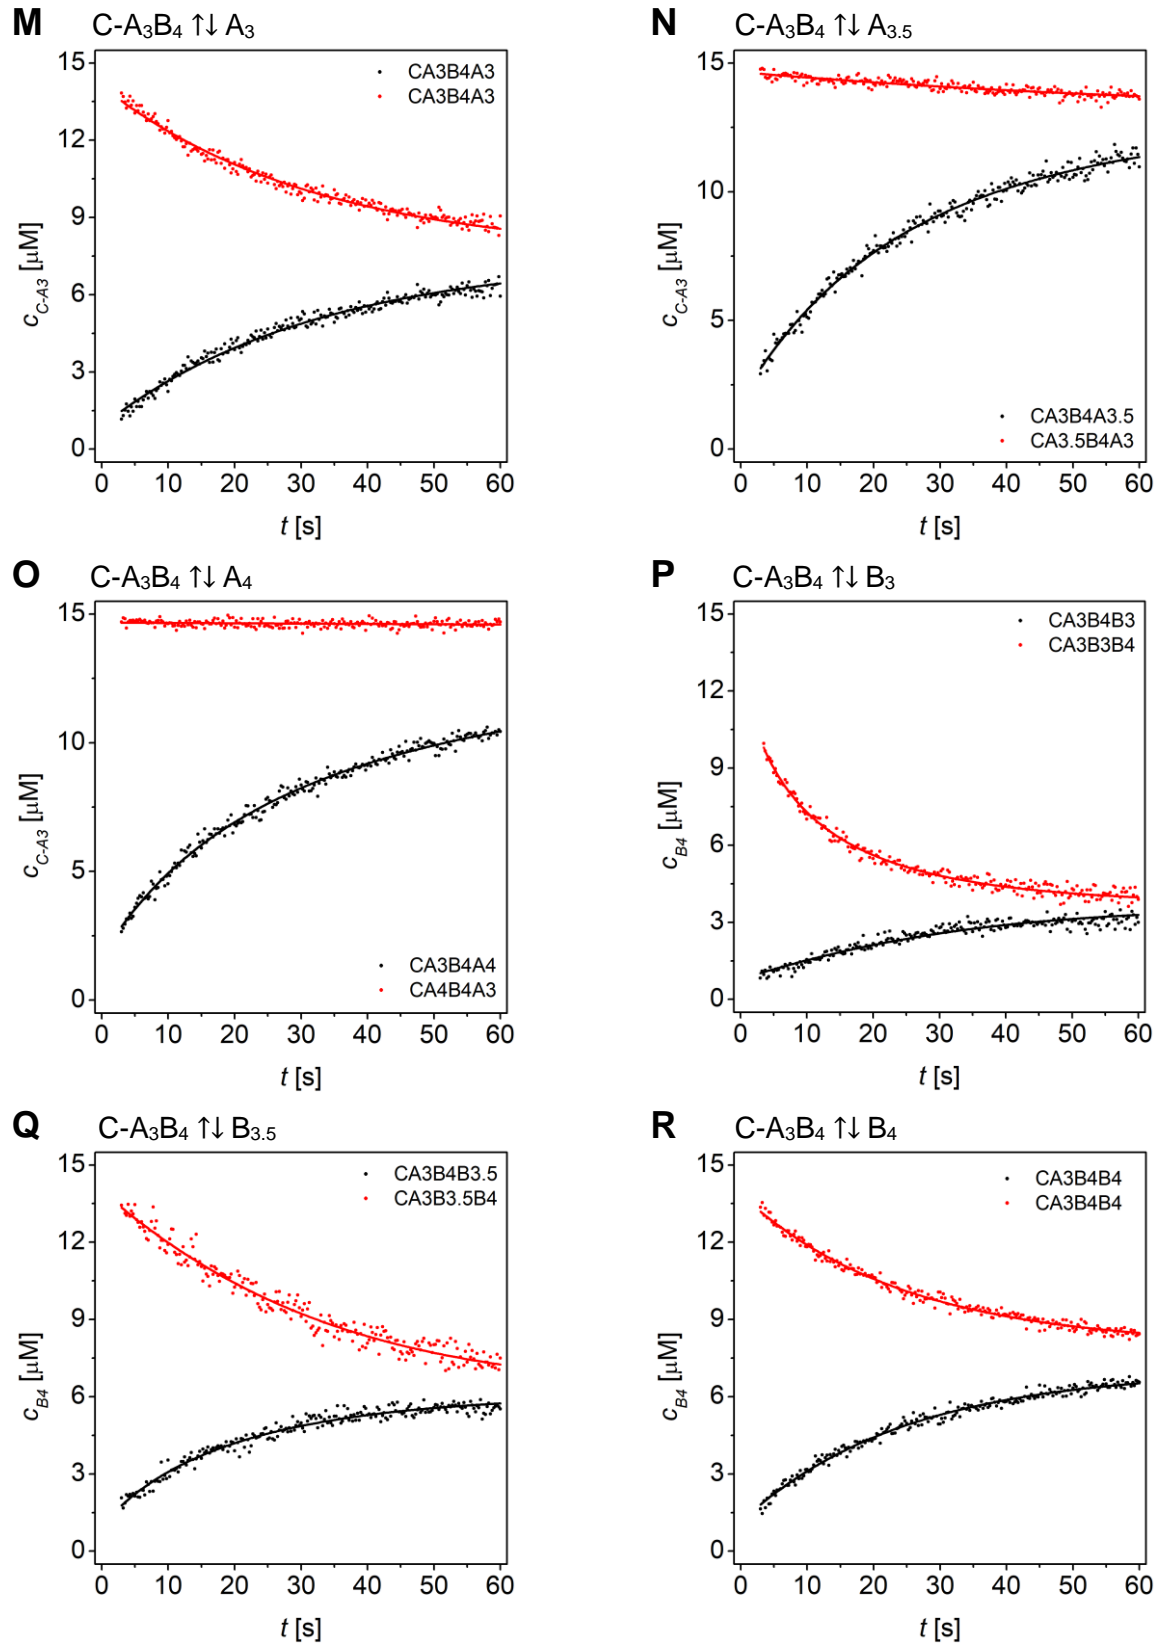

**Figure S11.** Dynafit results of least-squares fits strand displacement in C-A<sub>3</sub>B peptides using a competitive binding model.

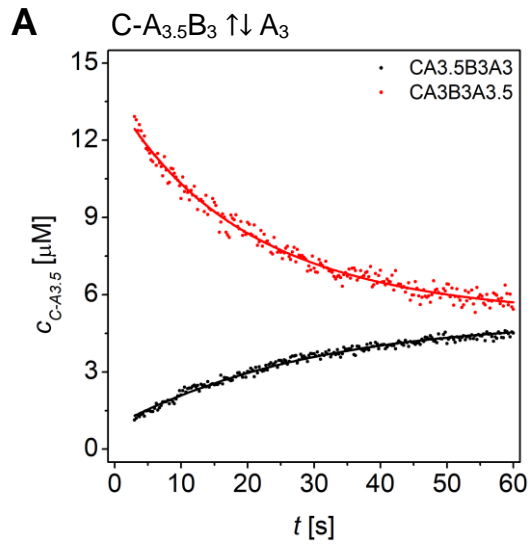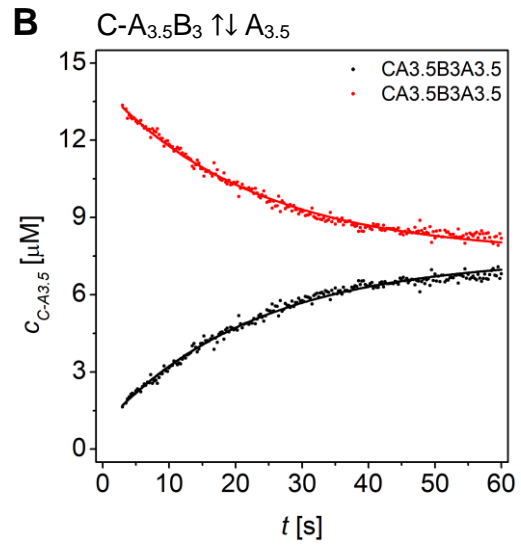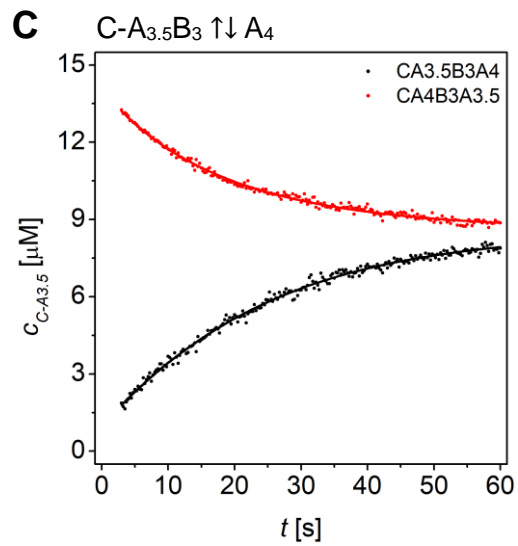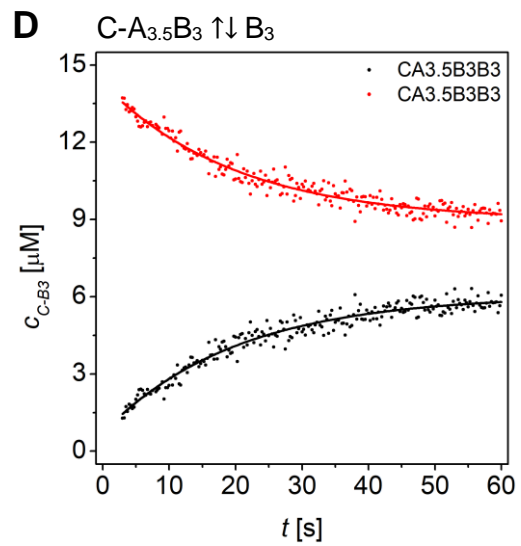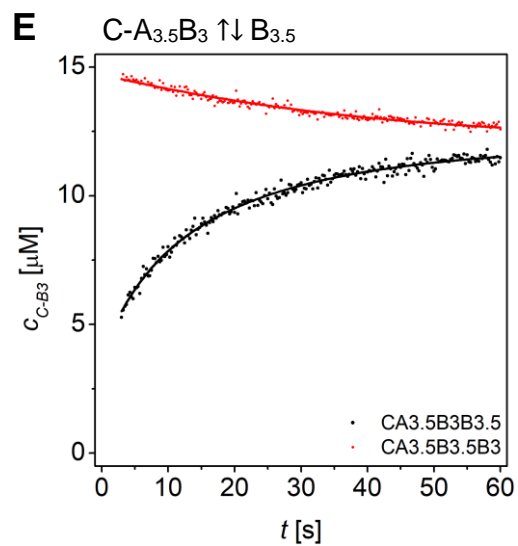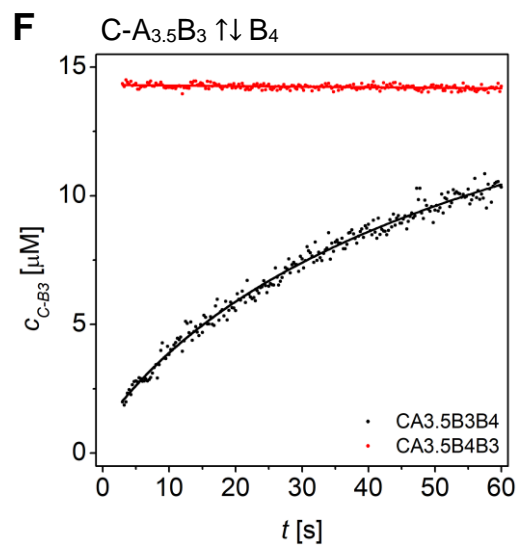

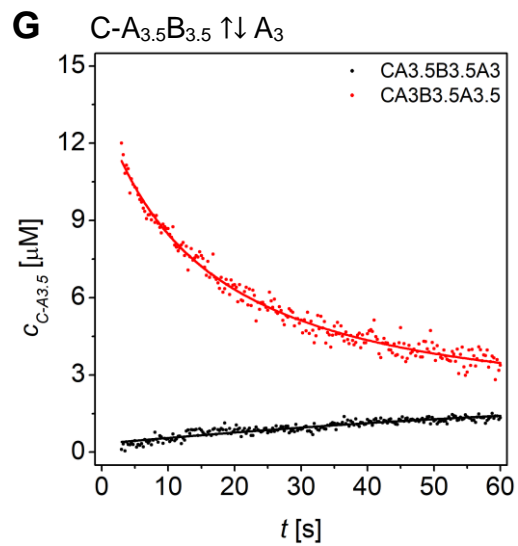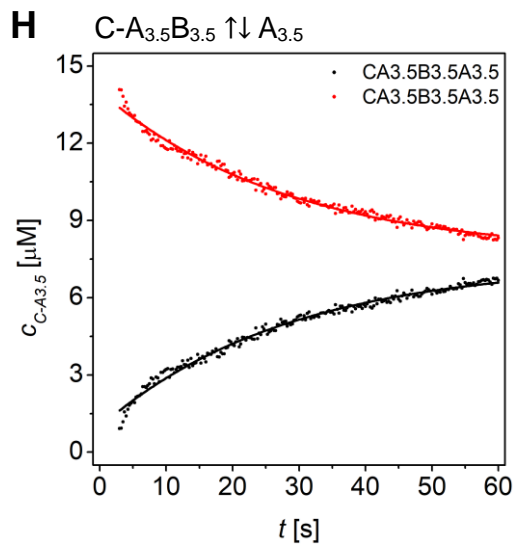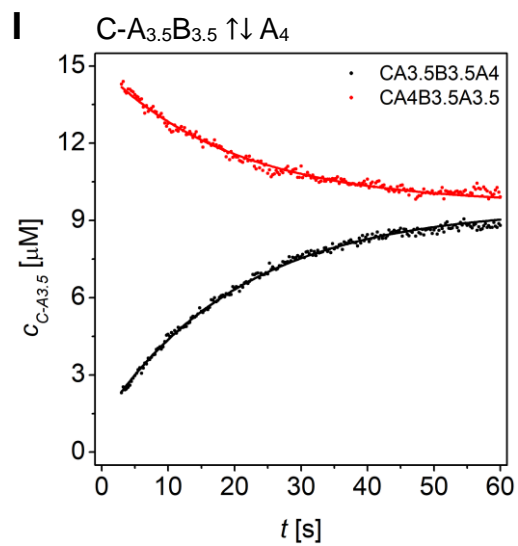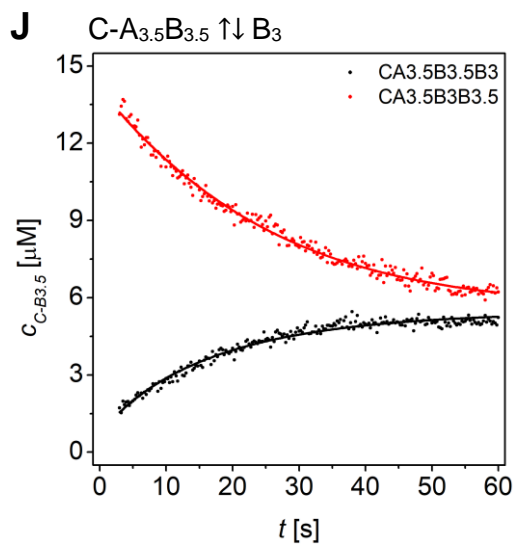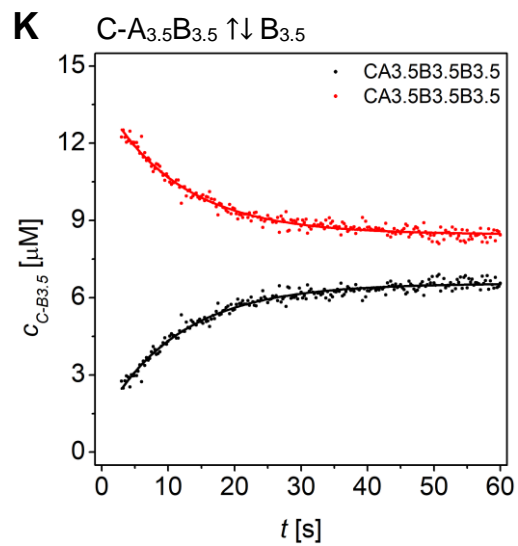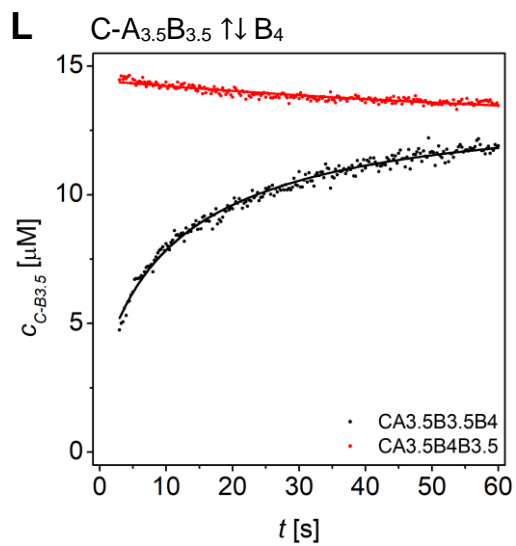

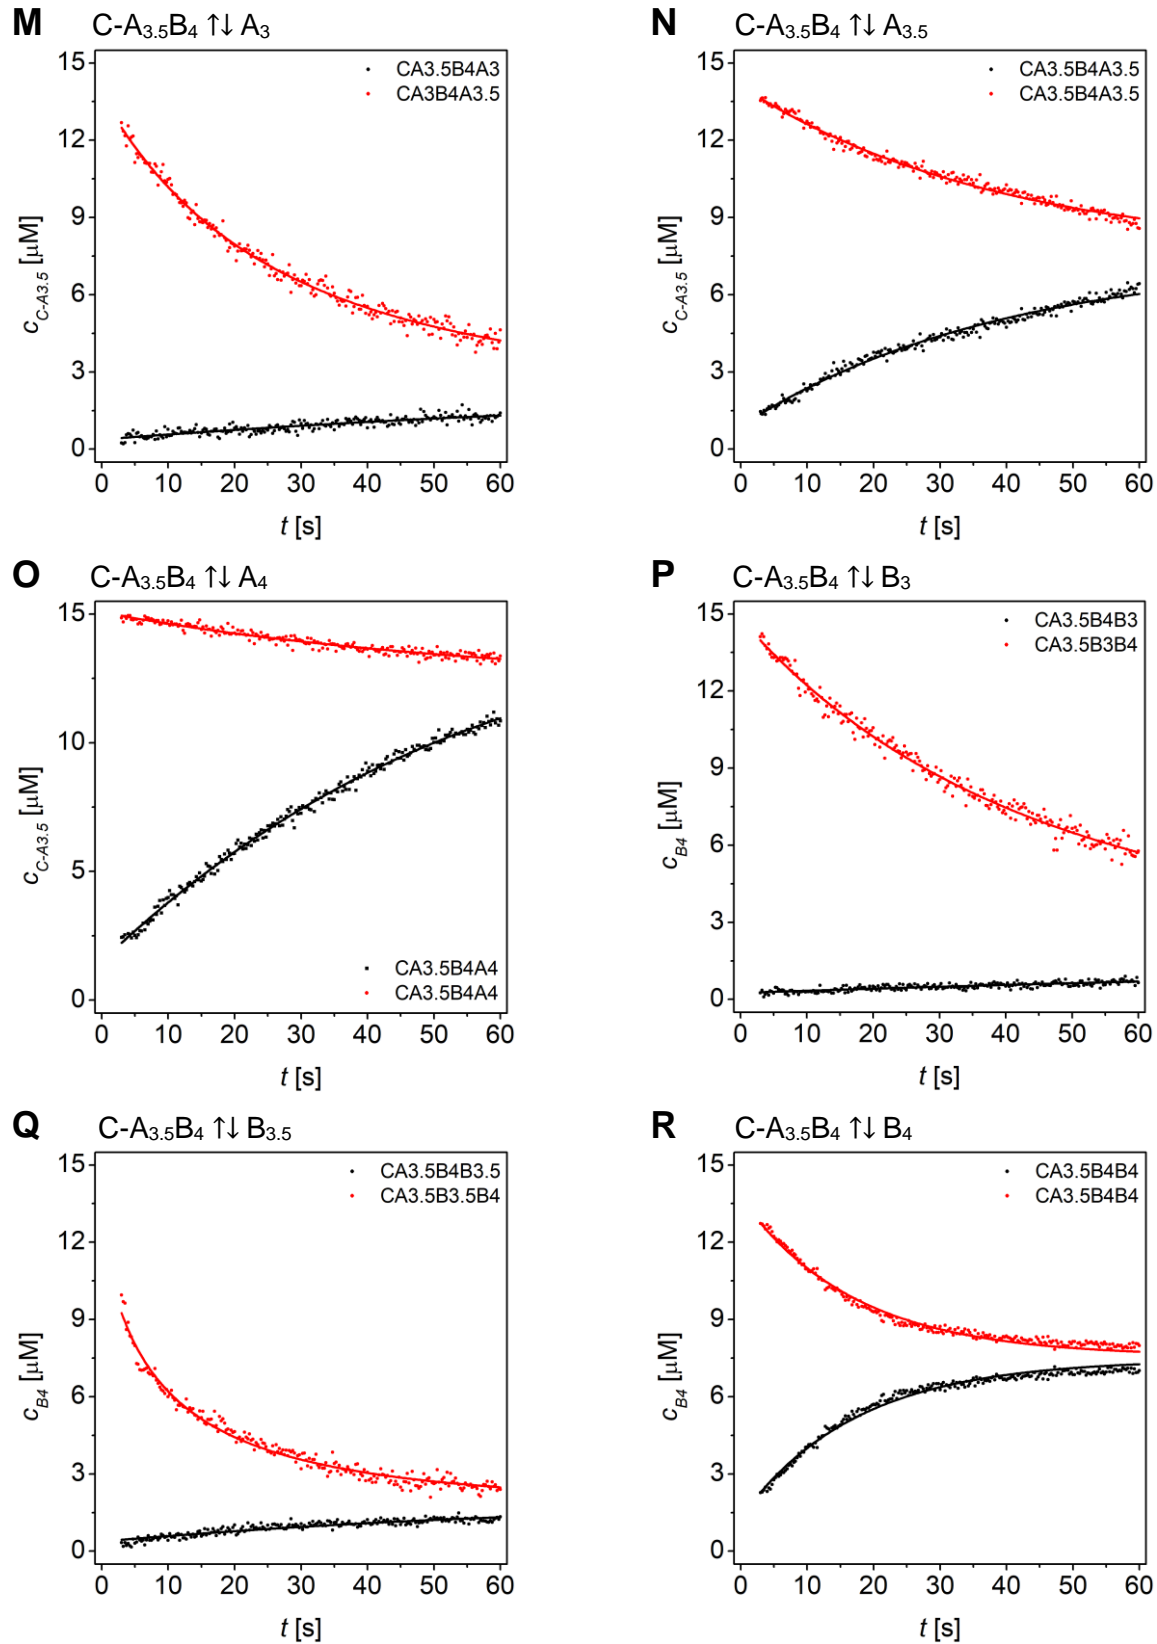

**Figure S12.** Dynafit results of least-squares fits strand displacement in C-A<sub>3.5</sub>B peptides using a competitive binding model.



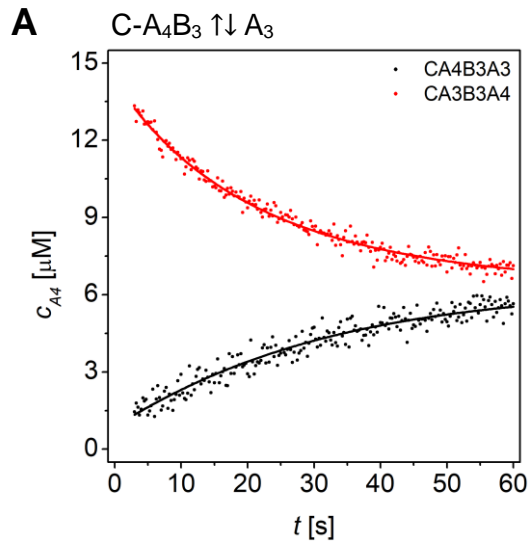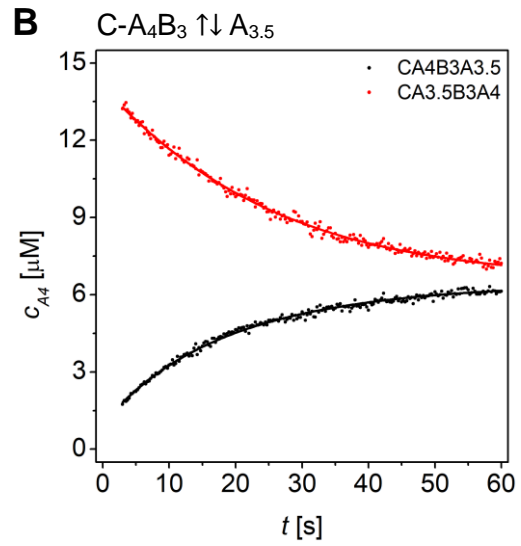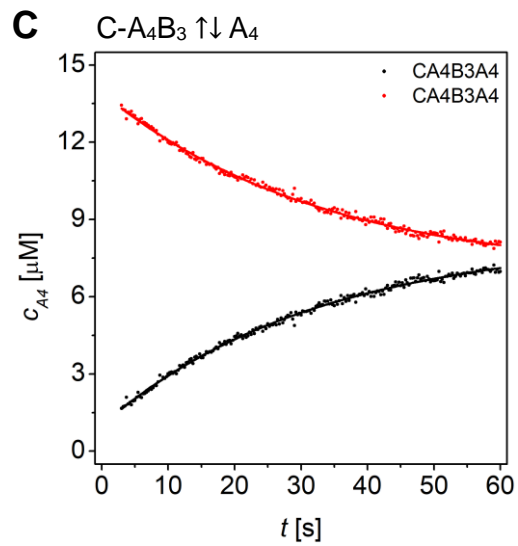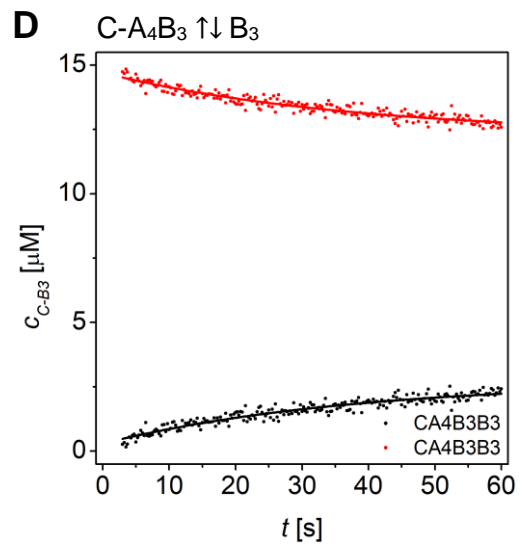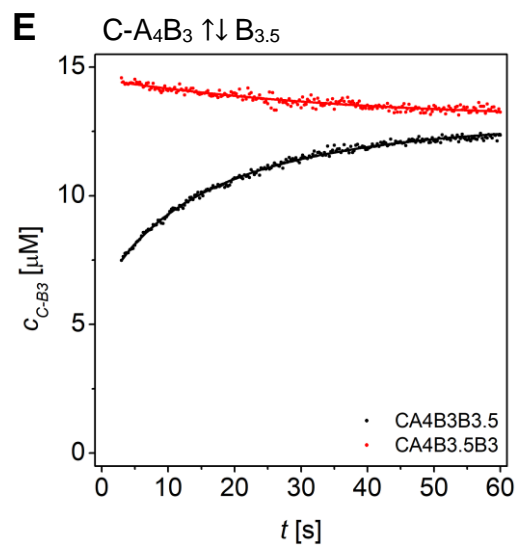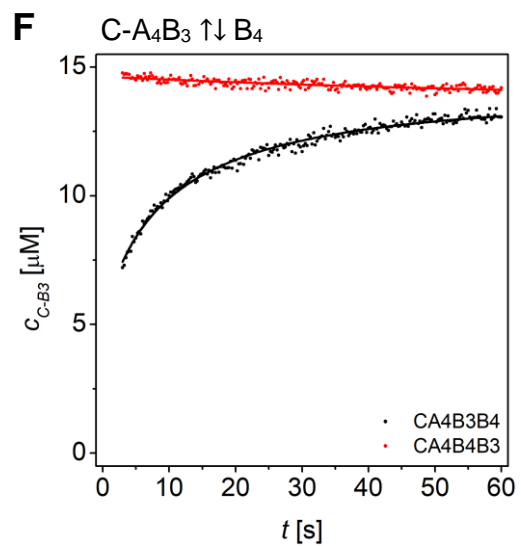

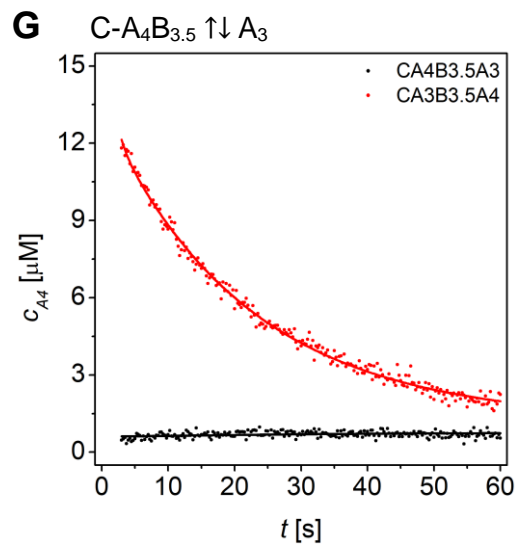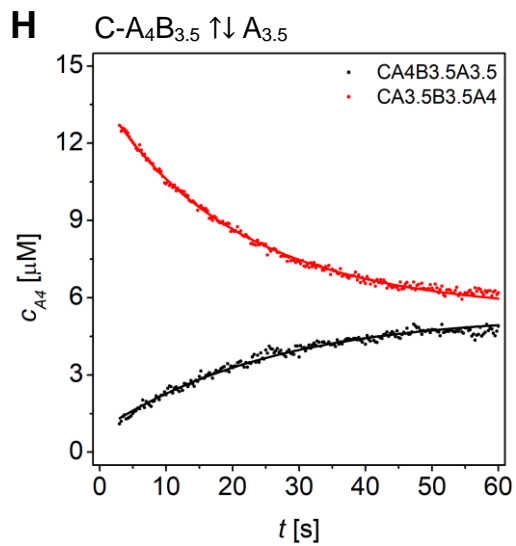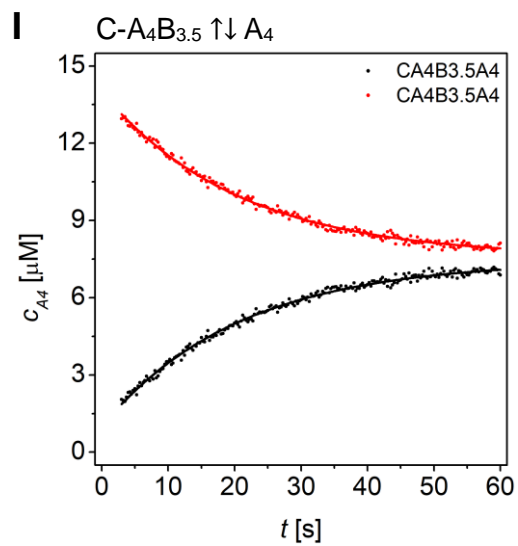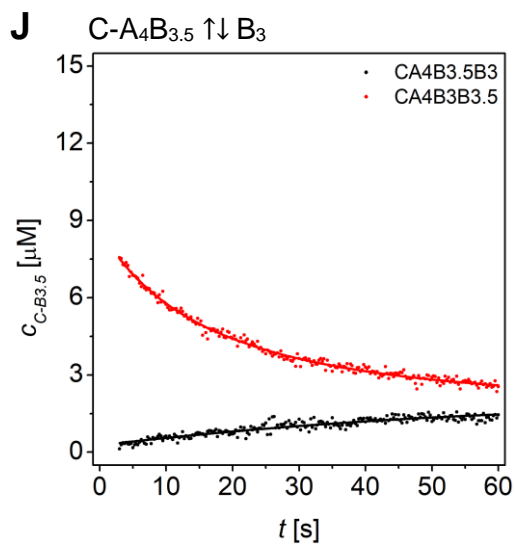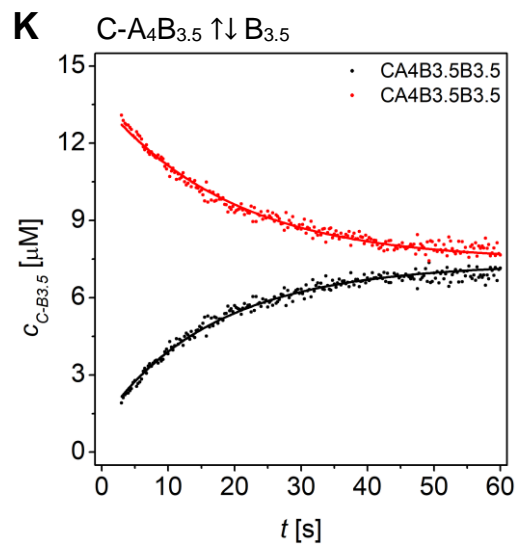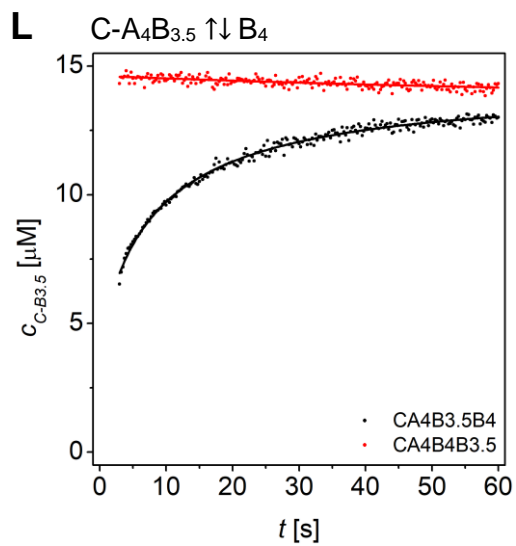

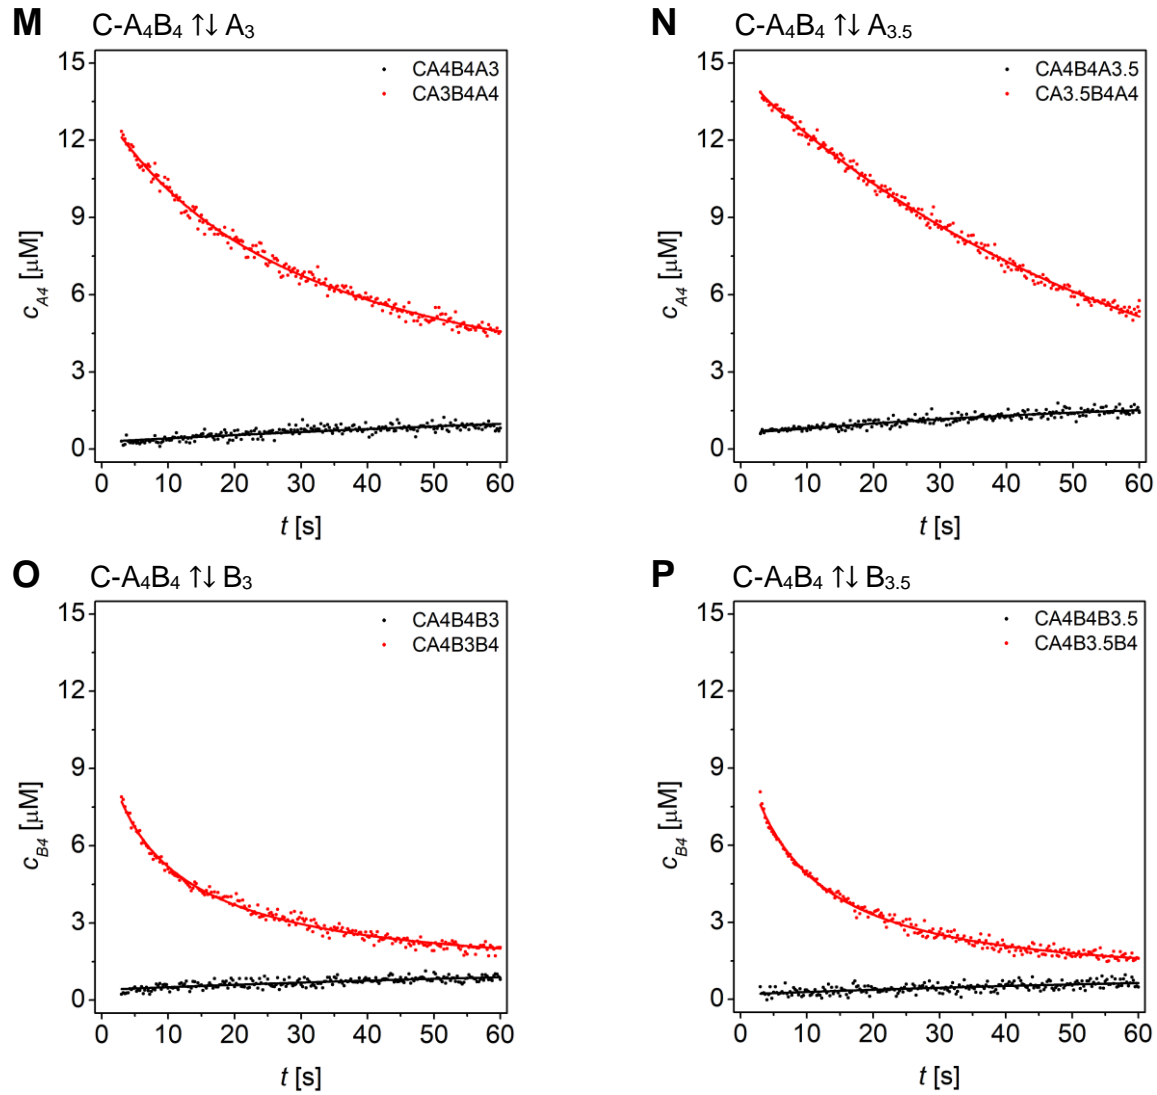

**Figure S13** Dynafit results of least-squares fits strand displacement in C-A<sub>4</sub>B peptides using a competitive binding model.

## 5. MALDI-TOF mass spectrometry and HPLC

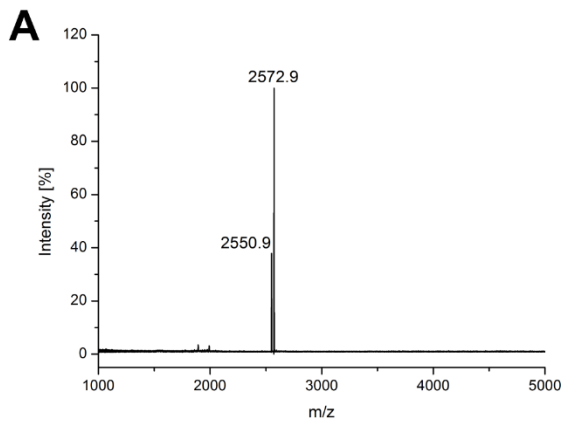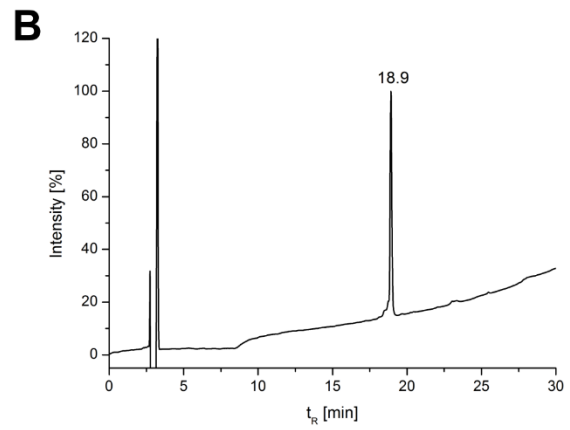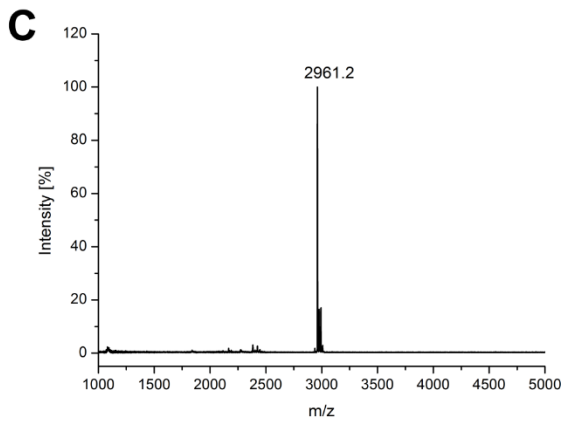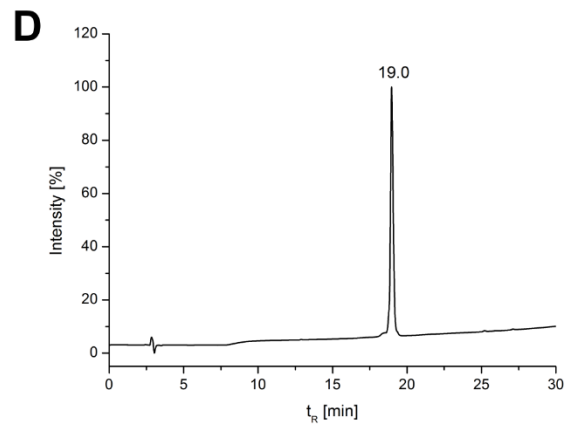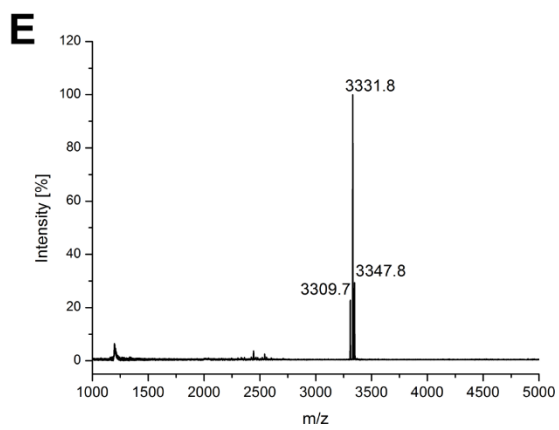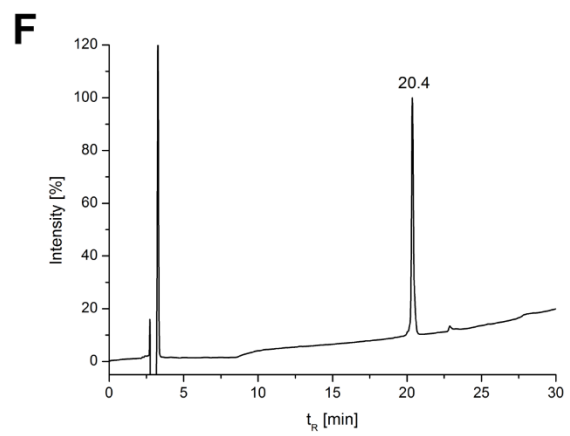

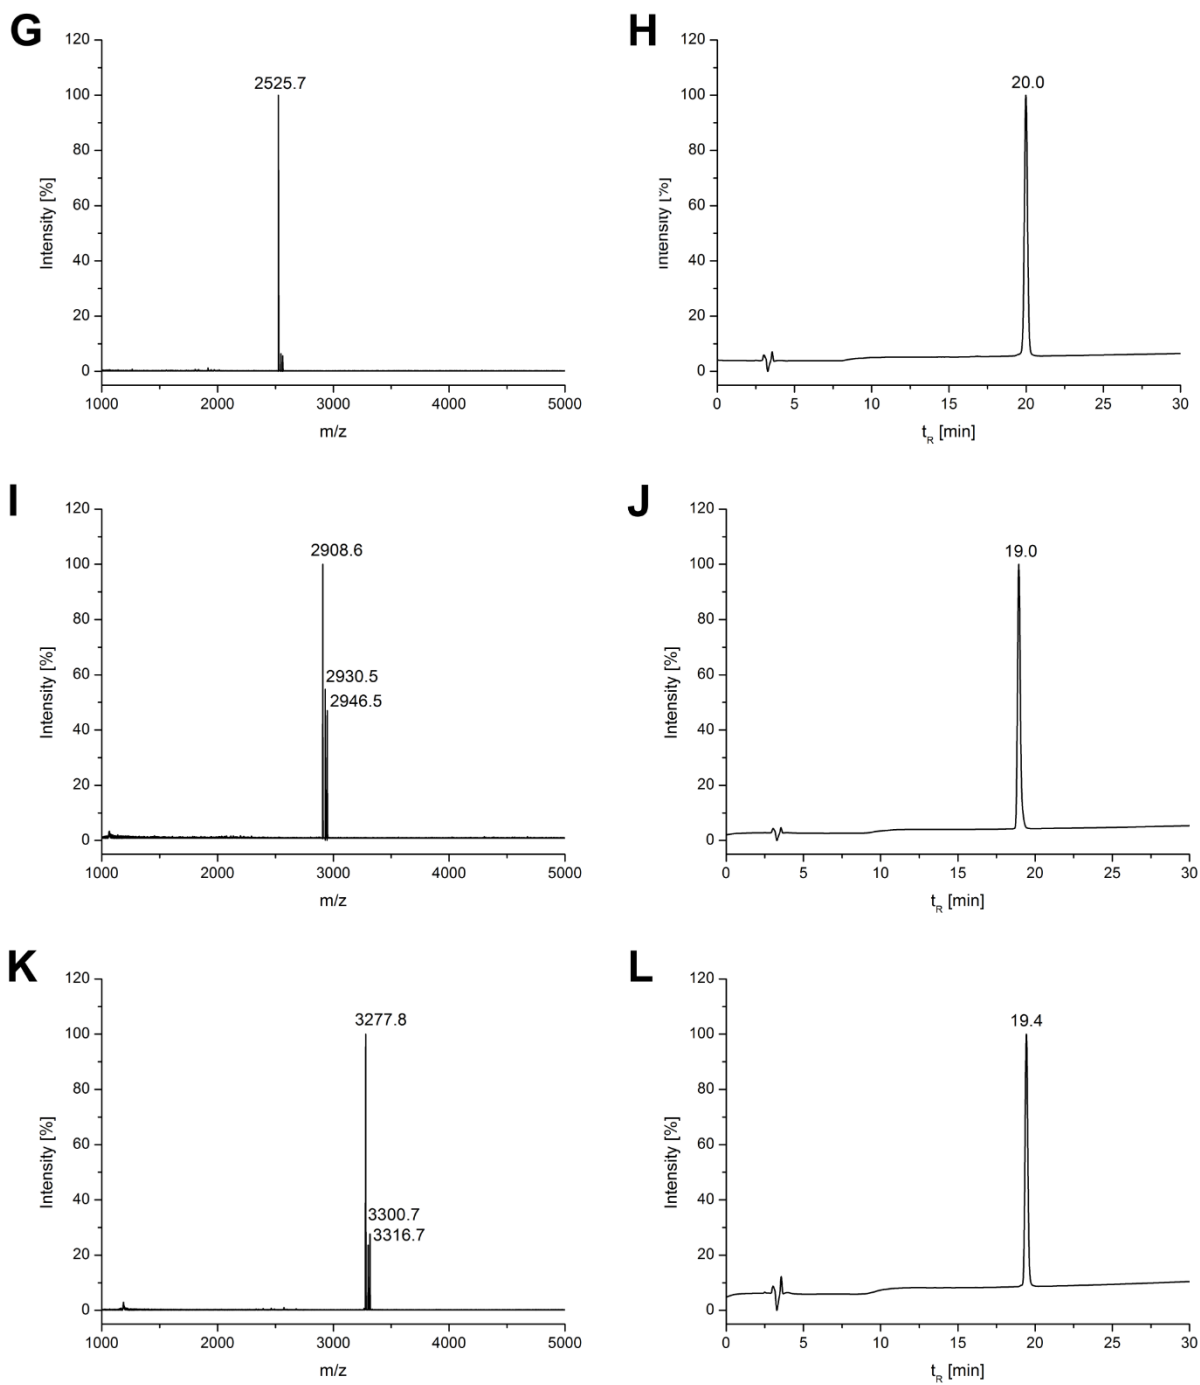

**Figure S14** MALDI/TOF mass spectra and HPLC traces of coiled-coil single strands of the C-truncated set of heterodimeric coiled coils (A-B: C-A<sub>3</sub> calc. [M+H<sup>+</sup>]: 2552.2, C-D: C-A<sub>3.5</sub> calc. [M+Na<sup>+</sup>]: 2961.2, E-F: A<sub>4</sub> calc. [M+H<sup>+</sup>]: 3309.6, G-H: C-B<sub>3</sub> calc. [M+H<sup>+</sup>]: 2525.1, I-J: C-B<sub>3.5</sub> calc. [M+H<sup>+</sup>]: 2909.6, K-L: B<sub>4</sub> calc. [M+H<sup>+</sup>]: 3279.0).

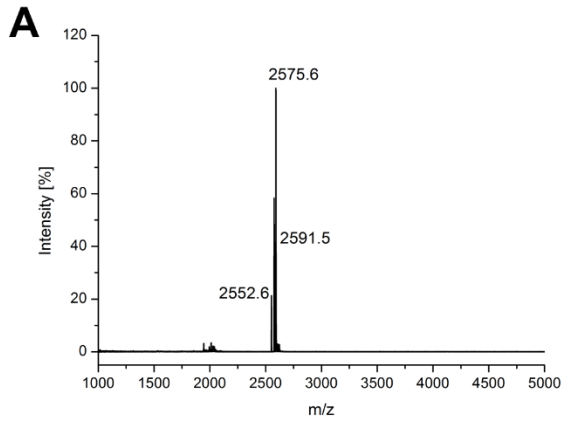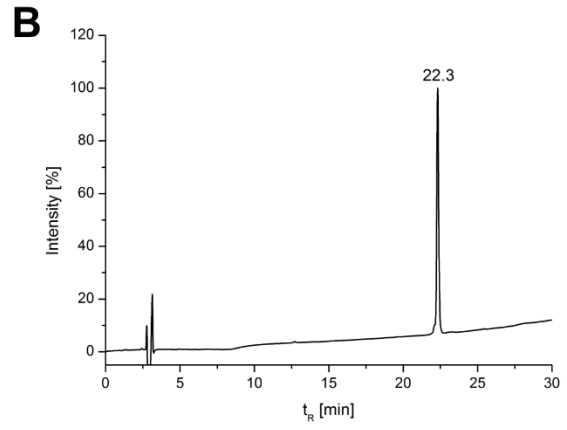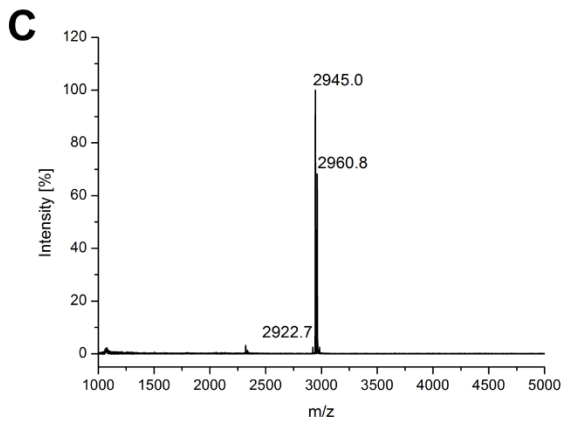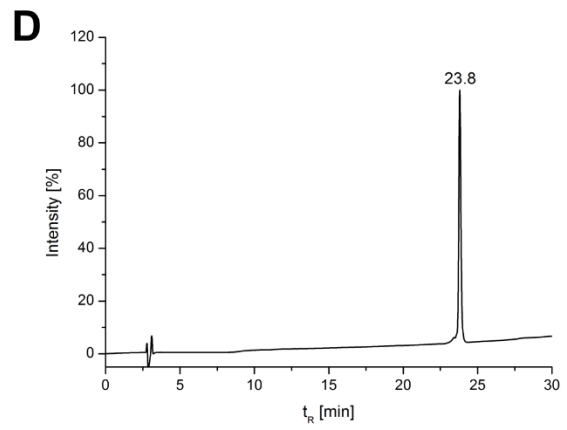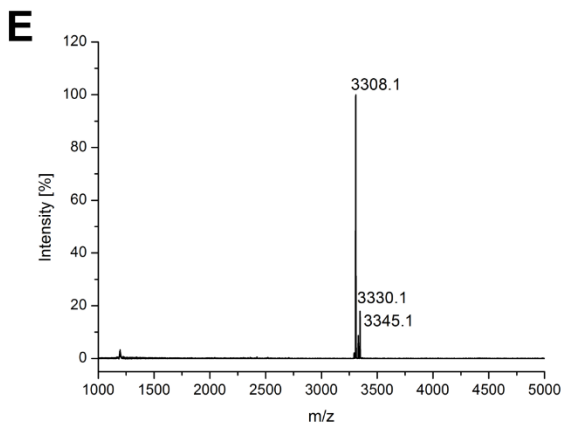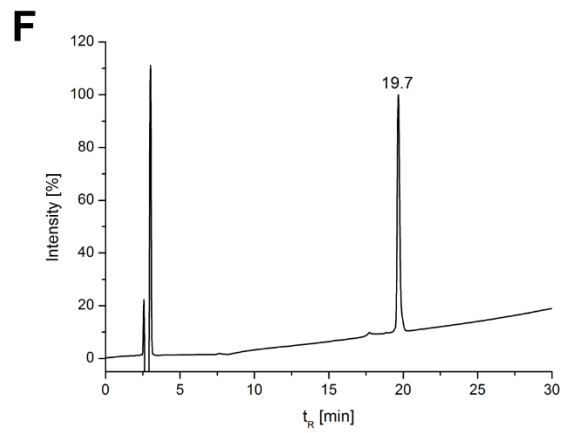

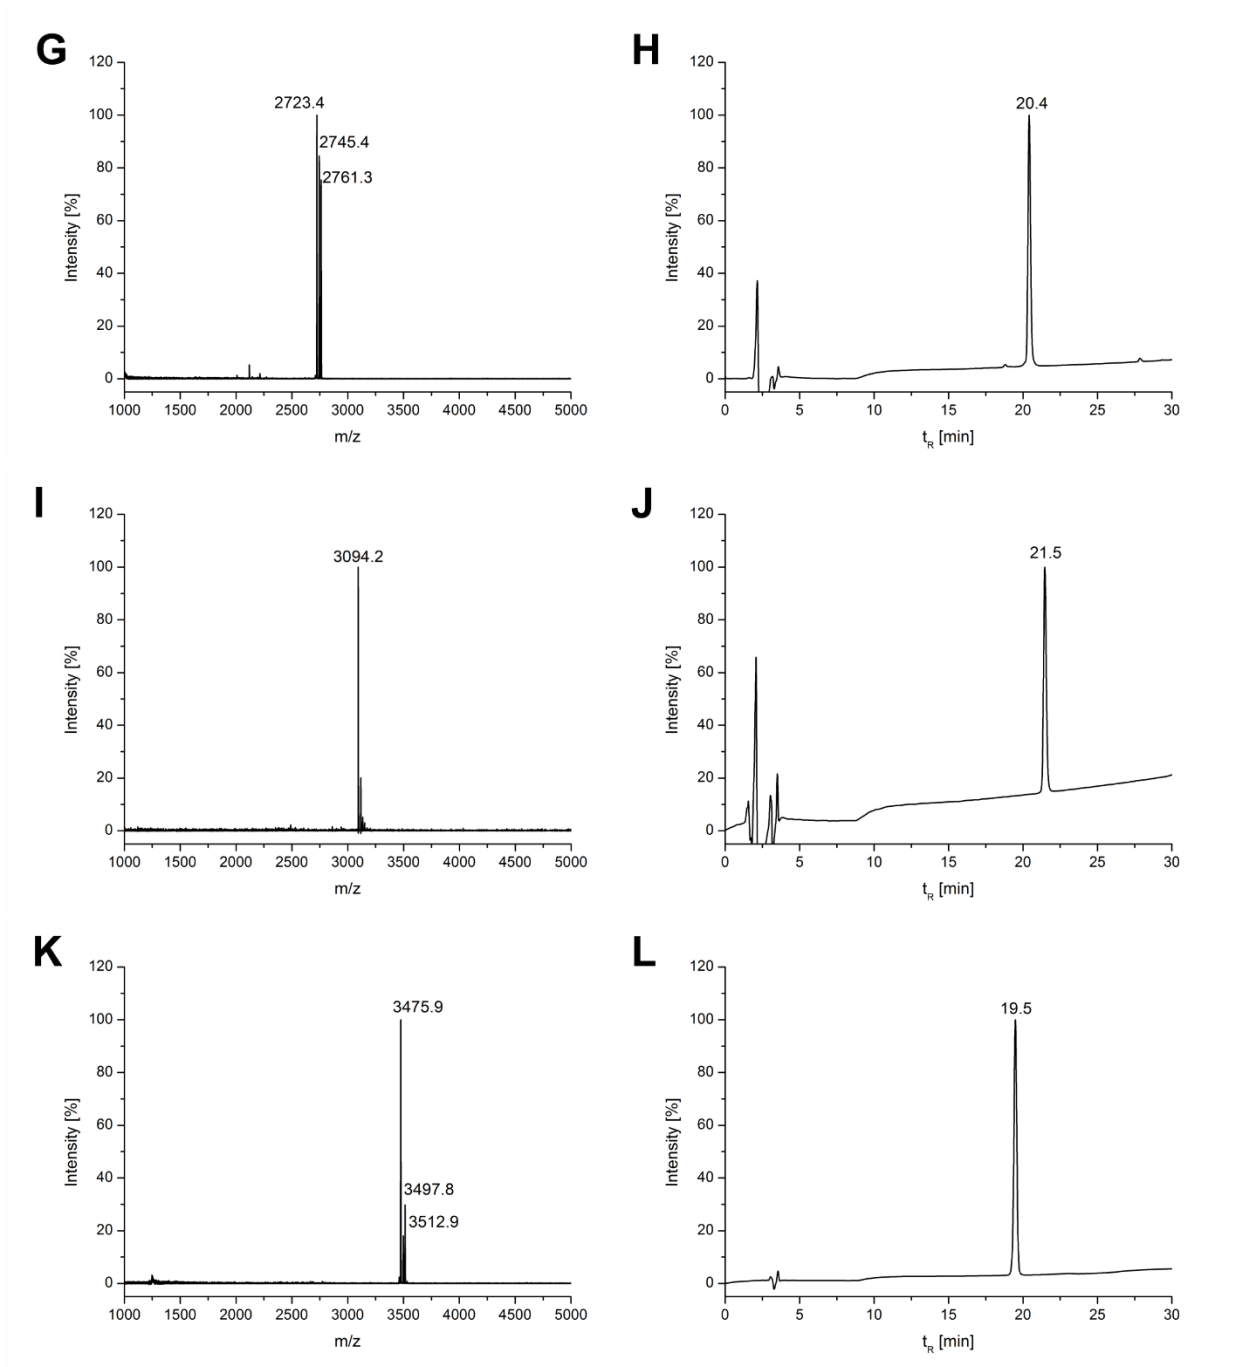

**Figure S15.** MALDI/TOF mass spectra and HPLC traces of coiled-coil single strands of the N-truncated set of heterodimeric coiled coils (A-B: N-A<sub>3</sub><sup>+</sup> calc. [M+H]<sup>+</sup>: 2553.3, C-D: N-A<sub>3.5</sub><sup>+</sup> calc. [M+Na]<sup>+</sup>: 2945.5, E-F: A<sub>4</sub><sup>+</sup> calc. [M+H]<sup>+</sup>: 3309.6, G-H: N-B<sub>3</sub><sup>+</sup> calc. [M+H]<sup>+</sup>: 2723.3, I-J: N-B<sub>3.5</sub><sup>+</sup> calc. [M+H]<sup>+</sup>: 3093.8, K-L: B<sub>4</sub><sup>+</sup> calc. [M+H]<sup>+</sup>: 3476.3).

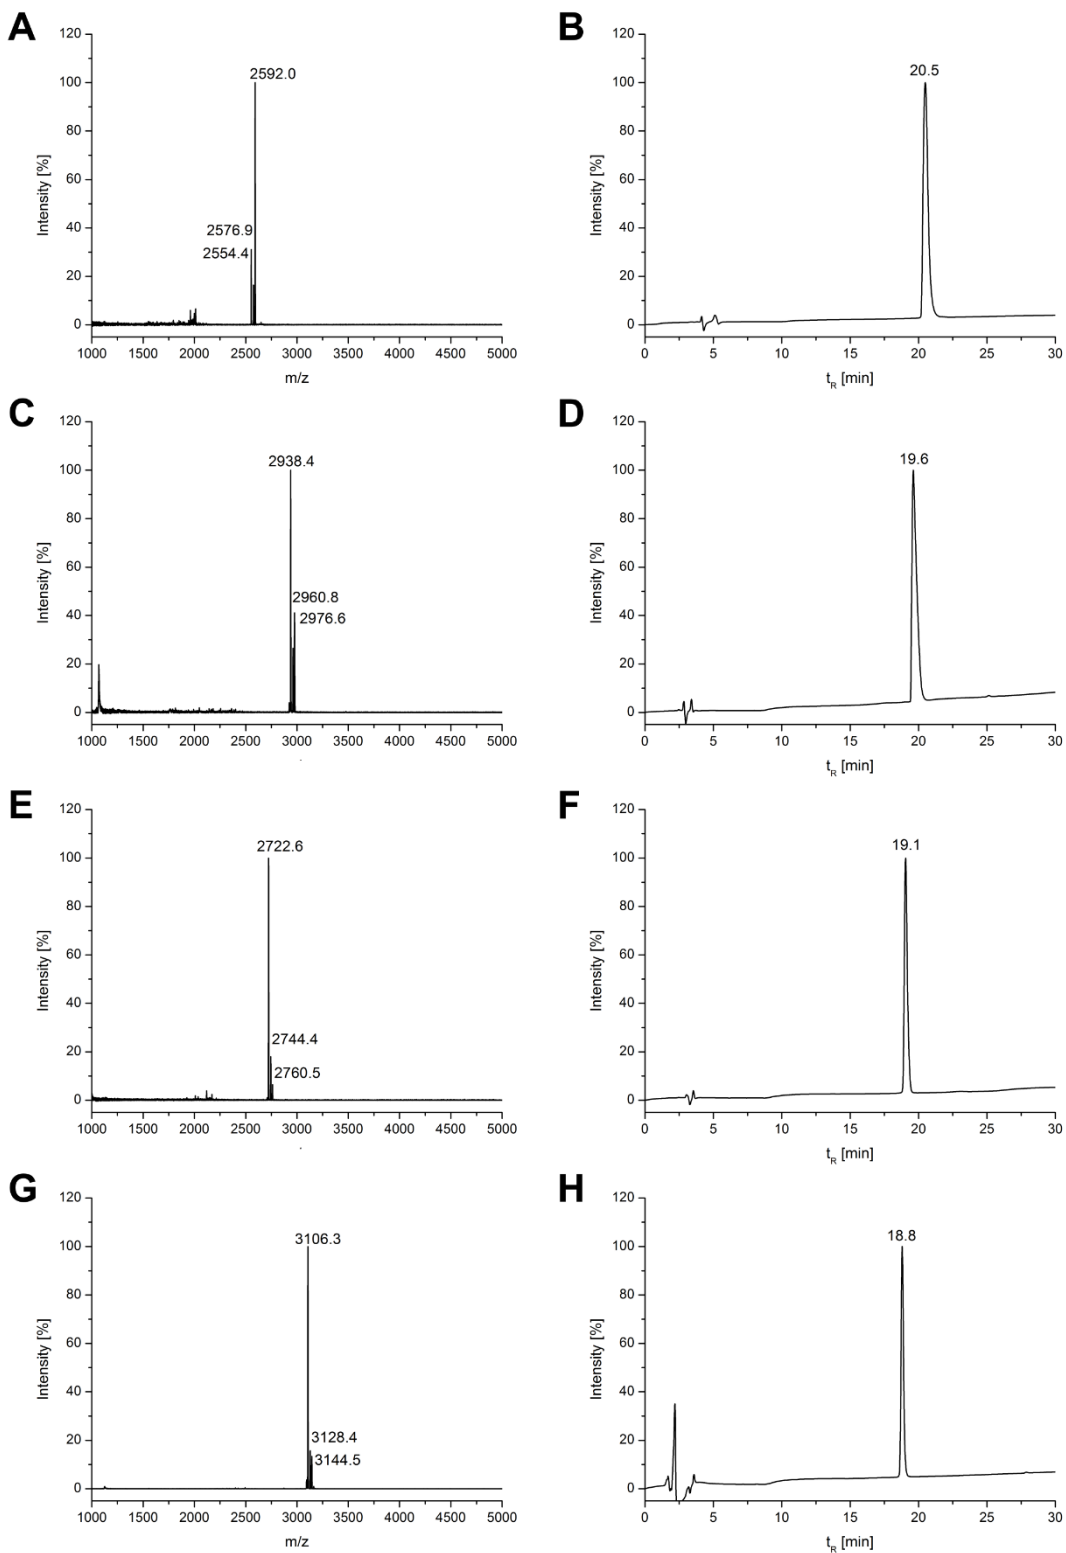

**Figure S16.** MALDI/TOF mass spectra and HPLC traces of coiled-coil single strands of the C-truncated set of heterodimeric coiled coils (A-B: C-A<sub>3</sub>\* calc. [M+H]<sup>+</sup>: 2553.2, C-D: C-A<sub>3.5</sub>\* calc. [M+H]<sup>+</sup>: 3937.4, E-F: C-B<sub>3</sub>\* calc. [M+H]<sup>+</sup>: 2723.3, G-H: C-B<sub>3.5</sub>\* calc. [M+H]<sup>+</sup>: 3106.9).



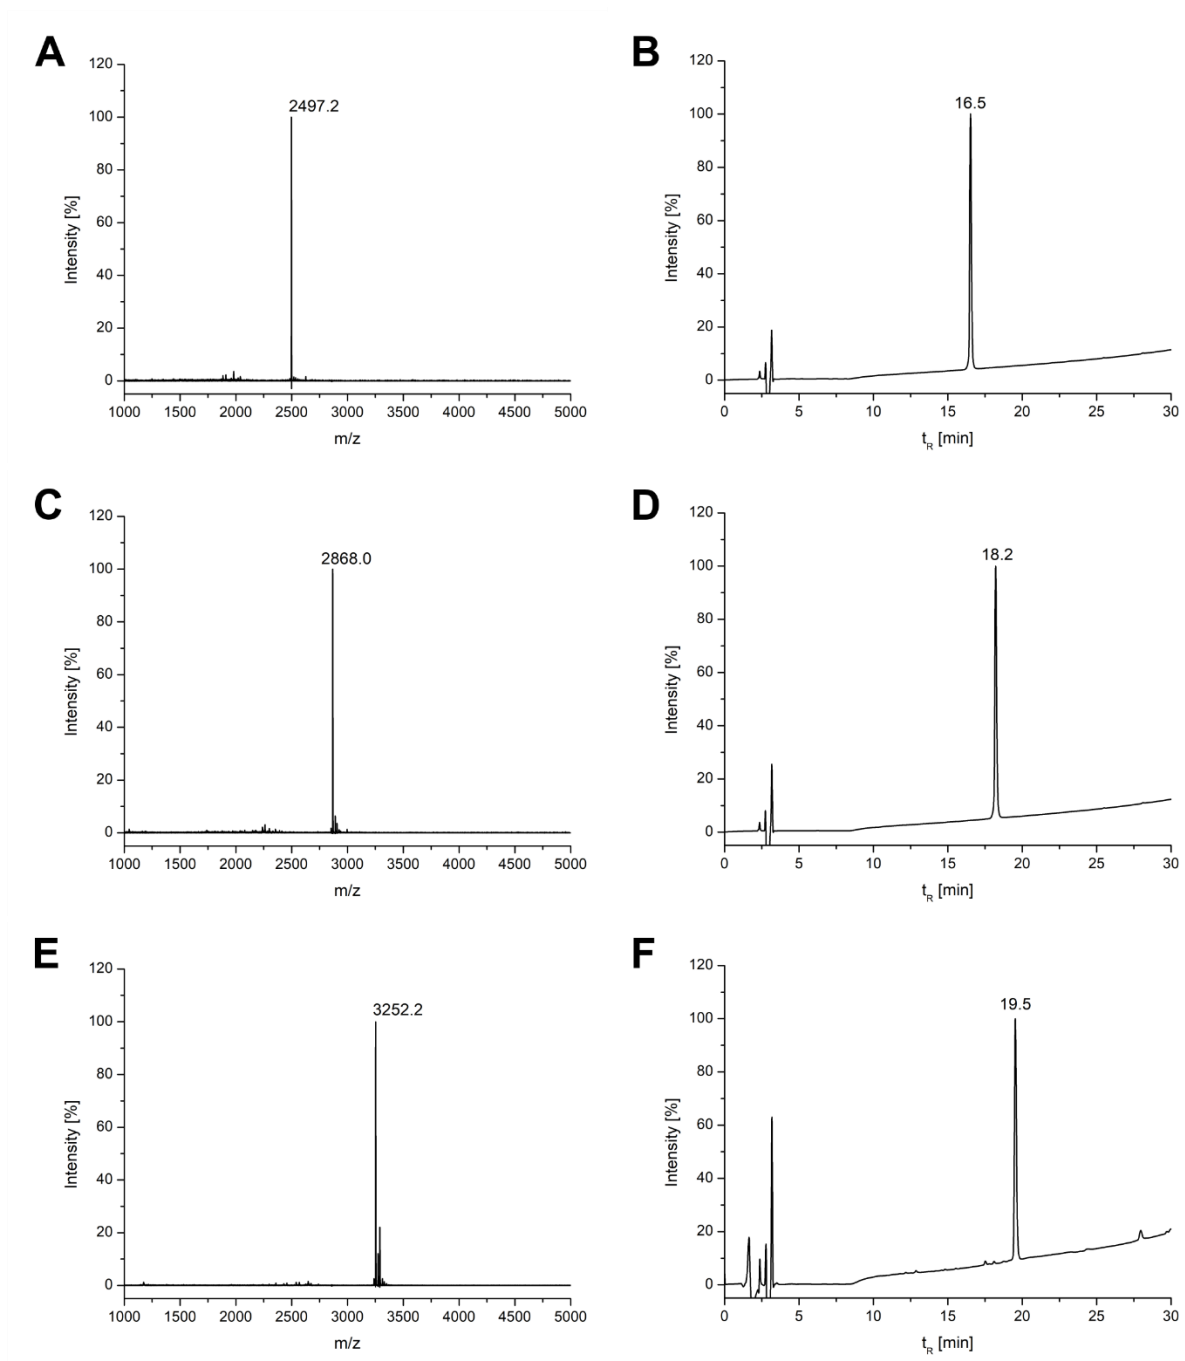

**Figure S17.** MALDI/TOF mass spectra and HPLC traces of non-labelled A-peptides of the *N*-truncated set of heterodimeric coiled coils (A-B: N-A3\_W15K calc.  $[M+H]^+$ : 2496.7, C-D: N-A3.5\_W18K calc.  $[M+H]^+$ : 2867.1, E-F: A4\_W22K calc.  $[M+H]^+$ : 3251.6).

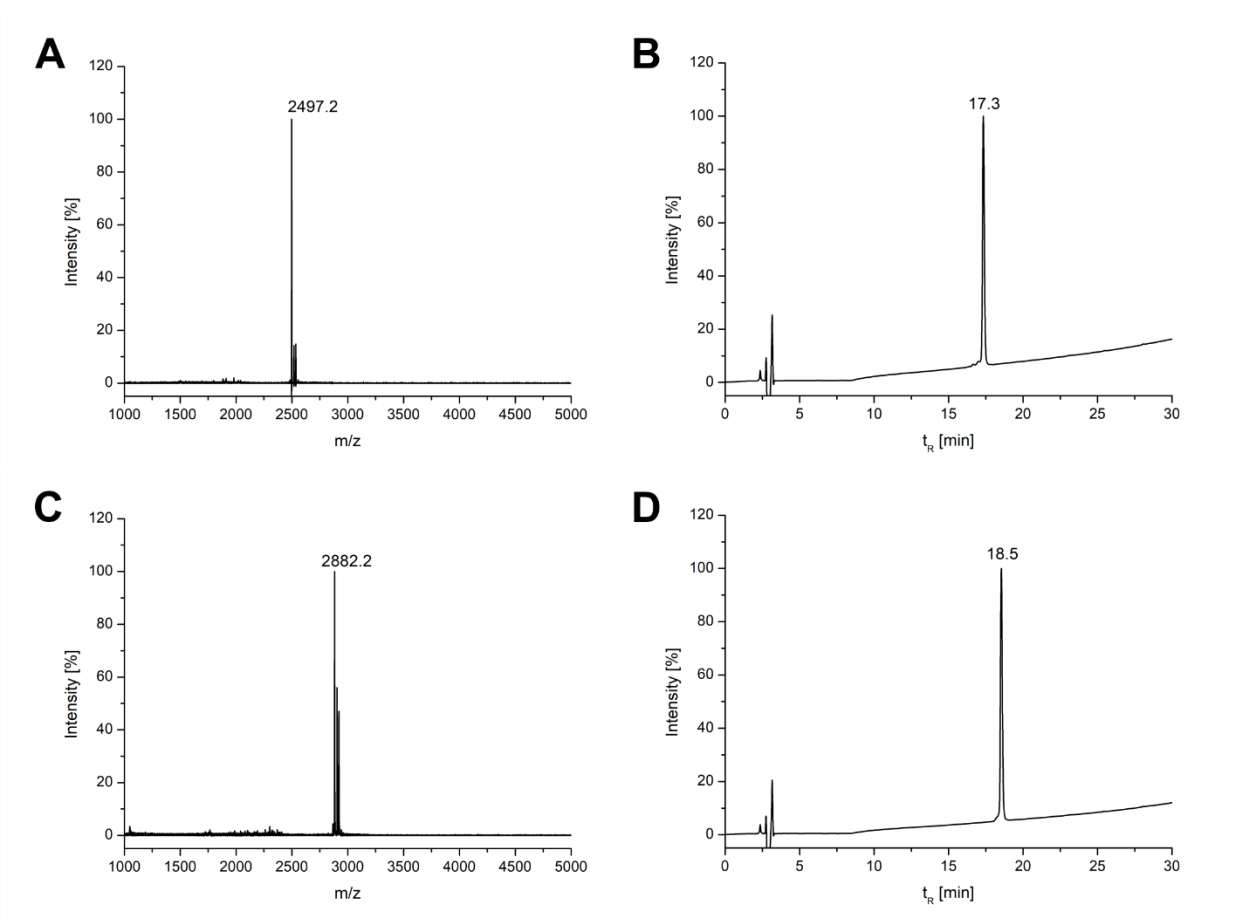

**Figure S18.** MALDI/TOF mass spectra and HPLC traces of coiled-coil single strands of the C-truncated set of heterodimeric coiled coils (A-B: C-A<sub>3</sub>\_W22K calc. [M+H<sup>+</sup>]: 2496.7, C-D: C-A<sub>3.5</sub>\_W22K calc. [M+H<sup>+</sup>]: 2881.2).

## 6. CD spectroscopy and thermal denaturation of C-truncated heterodimeric coiled coils

**A** C-A<sub>3</sub>

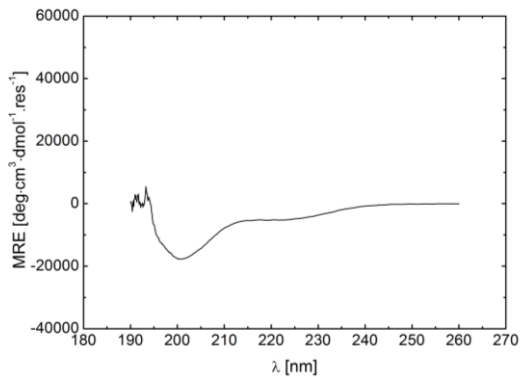

**B** C-A<sub>3</sub> CD melt

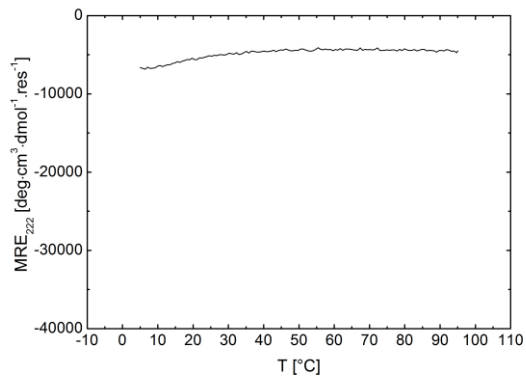

**C** C-A<sub>3.5</sub>

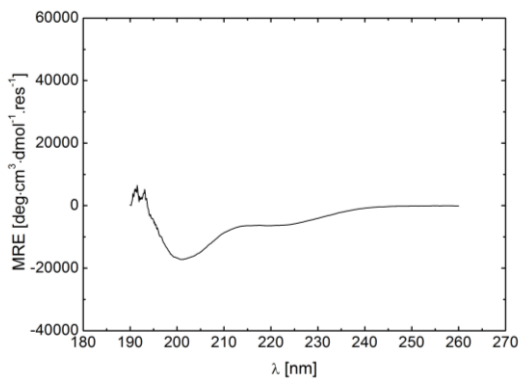

**D** C-A<sub>3.5</sub> CD melt

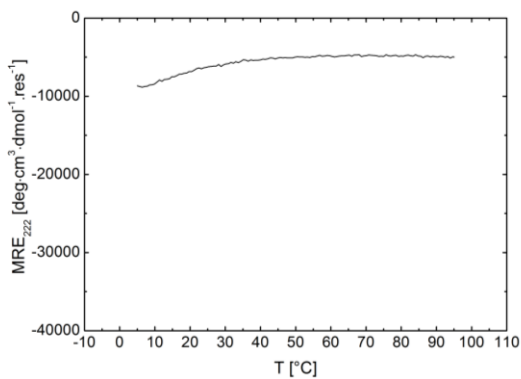

**E** A<sub>4</sub>

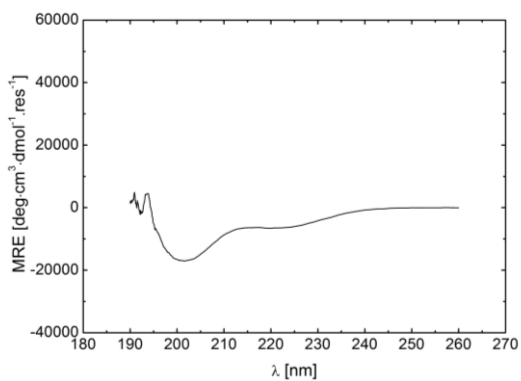

**F** A<sub>4</sub> CD melt

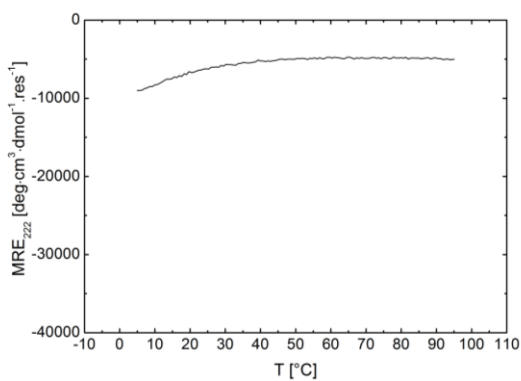

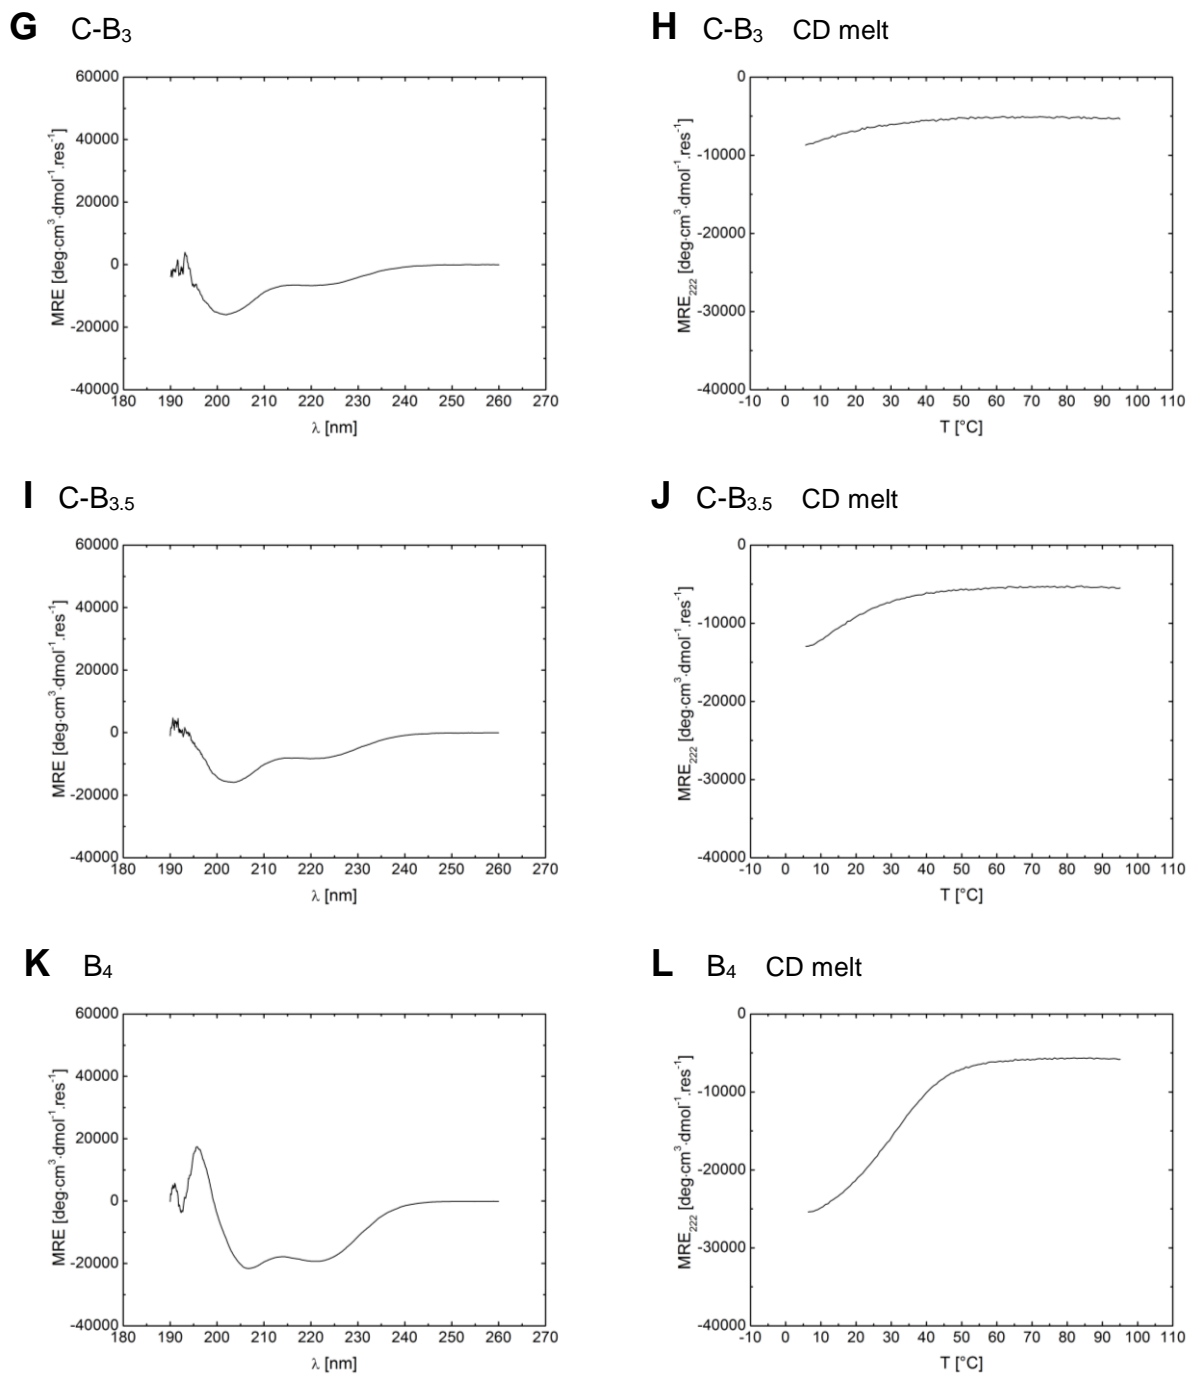

**Figure S19.** CD spectra (left) and thermal denaturation curves (right) of the coiled-coil single strands of the C-terminal truncated set of parallel heterodimeric coiled coils.

**A** C-A<sub>3</sub>B<sub>3</sub>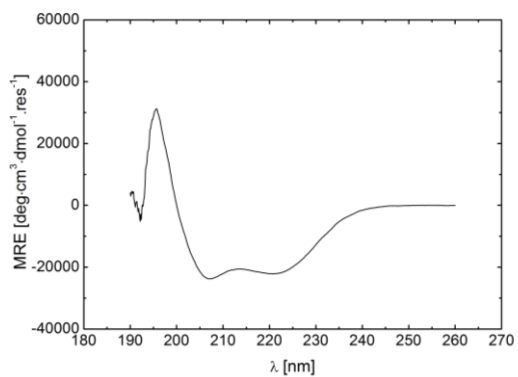**B** C-A<sub>3</sub>B<sub>3</sub> CD melt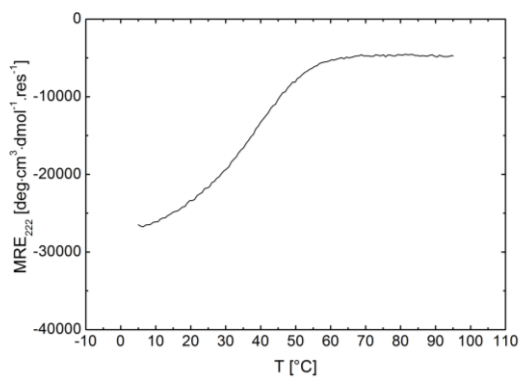**C** C-A<sub>3</sub>B<sub>3.5</sub>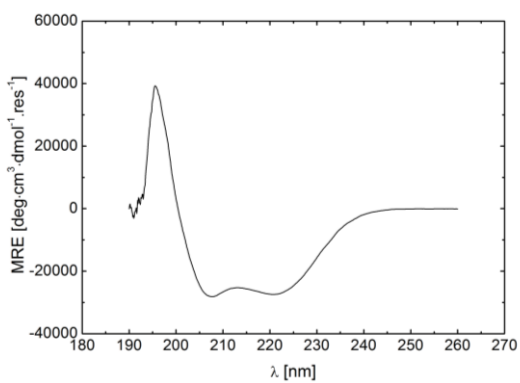**D** C-A<sub>3</sub>B<sub>3.5</sub> CD melt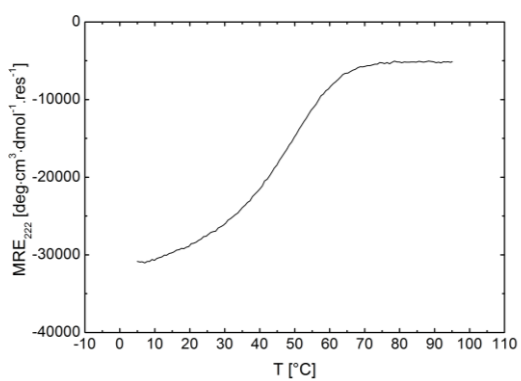**E** C-A<sub>3</sub>B<sub>4</sub>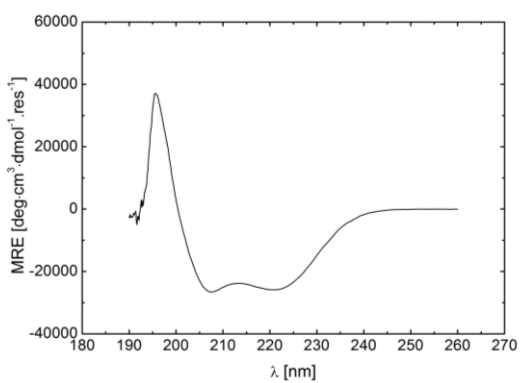**F** C-A<sub>3</sub>B<sub>4</sub> CD melt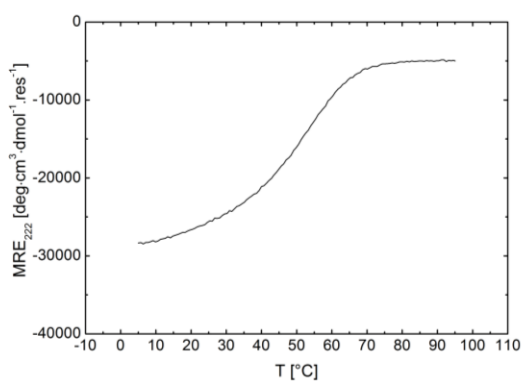

**E** C-A<sub>3.5</sub>B<sub>3</sub>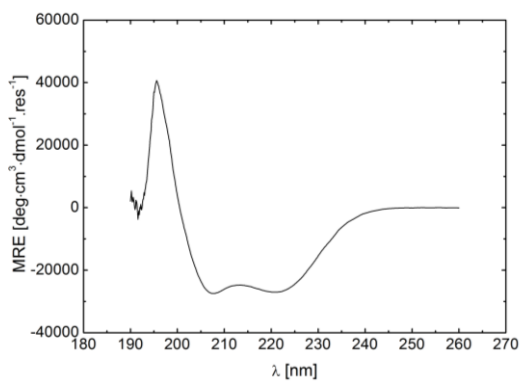**F** C-A<sub>3.5</sub>B<sub>3</sub> CD melt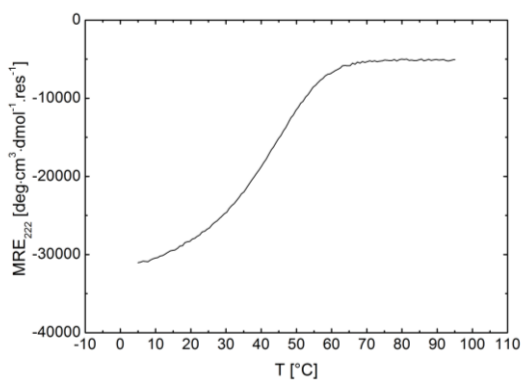**G** C-A<sub>3.5</sub>B<sub>3.5</sub>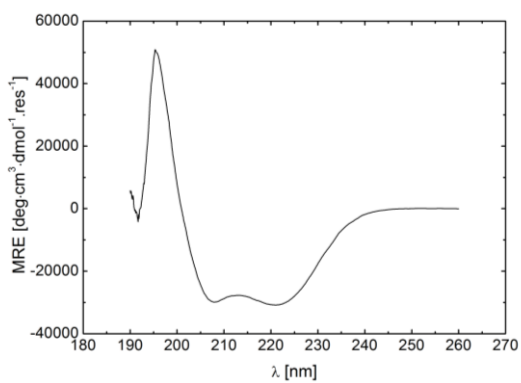**H** C-A<sub>3.5</sub>B<sub>3.5</sub> CD melt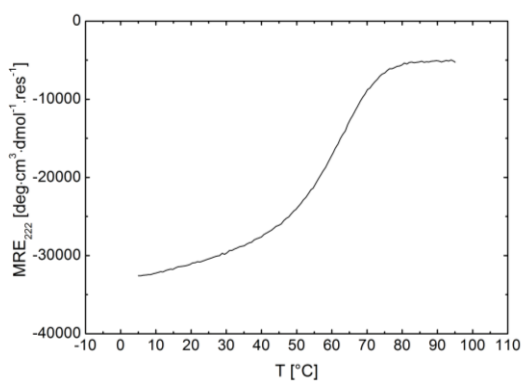**I** C-A<sub>3.5</sub>B<sub>4</sub>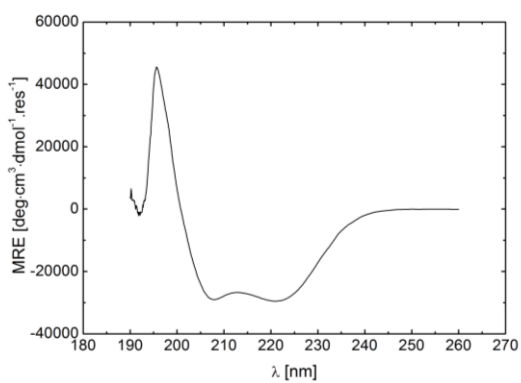**J** C-A<sub>3.5</sub>B<sub>4</sub> CD melt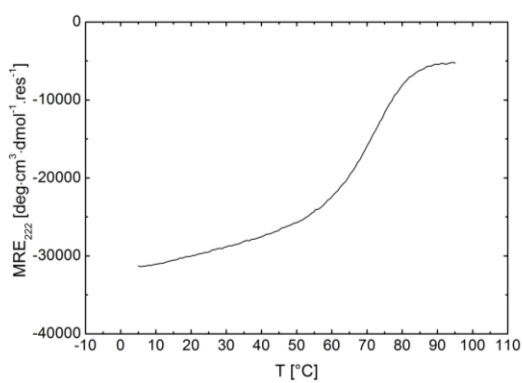

**K** C-A<sub>4</sub>B<sub>3</sub>

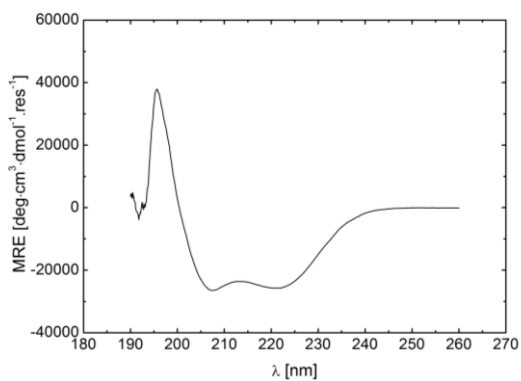

**L** C-A<sub>4</sub>B<sub>3</sub> CD melt

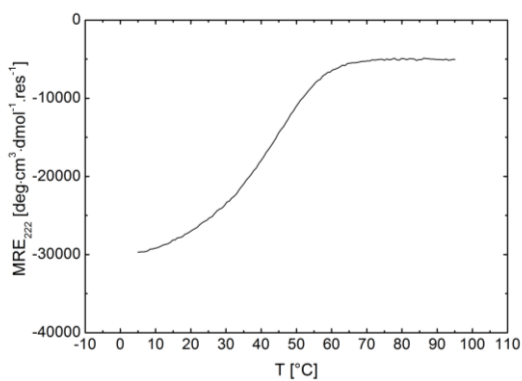

**M** C-A<sub>4</sub>B<sub>3.5</sub>

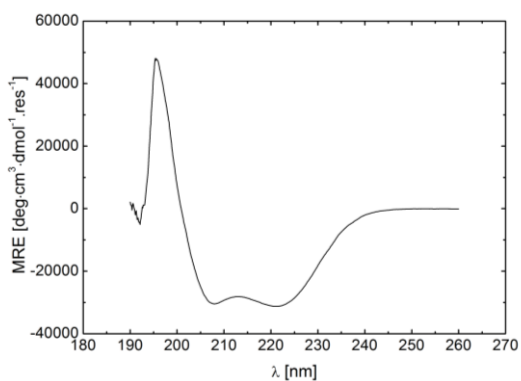

**N** C-A<sub>4</sub>B<sub>3.5</sub> CD melt

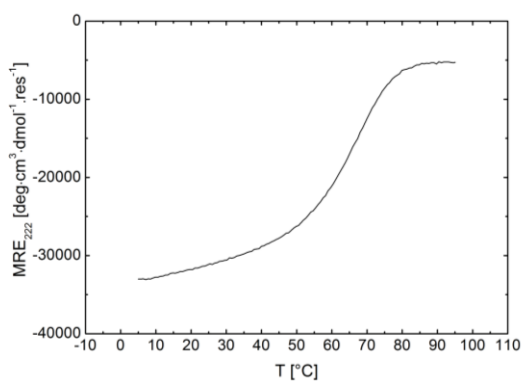

**O** A<sub>4</sub>B<sub>4</sub>

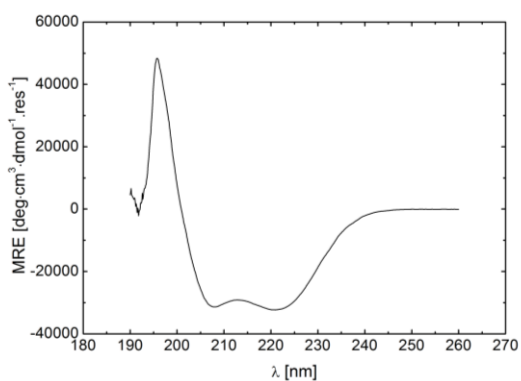

**P** A<sub>4</sub>B<sub>4</sub> CD melt

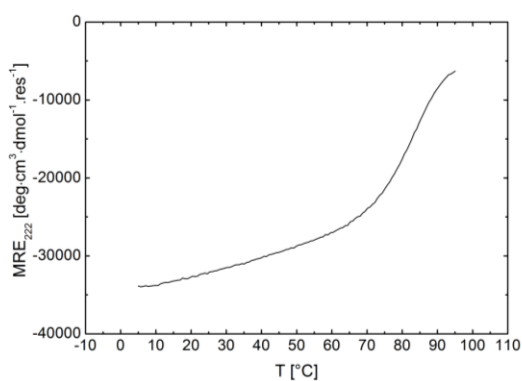

**Figure S20.** CD spectra (left) and thermal denaturation curves (right) of all possible combinations of C-terminal truncated set of parallel heterodimeric coiled coils.

## 7. References

- 1 M. Rabe, A. Boyle, H. R. Zope, F. Versluis and A. Kros, *Biopolymers*, 2015, **104**, 65–72.
- 2 P. Kuzmic, *Anal. Biochem.*, 1996, **237**, 260–273.
- 3 P. Kuzmic, *Anal. Biochem.*, 1999, **267**, 17–23.
